# Supplementary material
Source: publisher figshare collection journal article supplement (https://acs.figshare.com/ndownloader/files/3855166)
Supplement: Supplementary file 1 [file 3855166]

## Sheet: Supporting Information S1
Supporting Information S1 - BCS validation set of 127 compounds
#	Compound Name	Solubility (mg/mL)	Log Papp	Permeability Reference	Experimental BCS class	Literature BCS class	Literature BCS References	Differences between literature and experimental BCS class assignment
1	Praziquantel	0.4	-4.35655	González-Esquivel D, Rivera J, Castro N., et al., Int J Pharm. 2005 May 13;295(1-2):93-9	1	2	Annex 8: Proposal to waive in vivo bioequivalence requirements for WHO Model List of Essential Medicines immediate-release, solid oral dosage forms; Technical Report Series No. 937; 40th; WHO Expert Committee on Specification for Pharmaceutical Preparations, WHO Technical Report Series, No. 937, 2006; pp 391– 461; http://www.who.int/medicines/publications/essentialmedicines/en/index.html (accesse…	Large maximum dose causes a large dose number and therefore low solubility definition according to FDA guidelines	x
2	Verapamil	0.7205	-4.43783	Varma MV, Sateesh K, Panchagnula R., Mol Pharm. 2005 Jan-Feb;2(1):12-21 Polli JW, Wring SA, Humphreys JE., et al., J Pharmacol Exp Ther. 2001 Nov;299(2):620-8 Skolnik S, Lin X, Wang J., et al., J Pharm Sci, 2010, 99, 3246-65	1	2	Annex 8: Proposal to waive in vivo bioequivalence requirements for WHO Model List of Essential Medicines immediate-release, solid oral dosage forms; Technical Report Series No. 937; 40th; WHO Expert Committee on Specification for Pharmaceutical Preparations, WHO Technical Report Series, No. 937, 2006; pp 391– 461; http://www.who.int/medicines/publications/essentialmedicines/en/index.html (accesse…	Large maximum dose causes a large dose number and therefore low solubility definition according to FDA guidelines	x
3	Acetazolamide	0.7112	-6.67778	Granero GE, Longhi MR, Becker C., et al, J Pharm Sci. 2008 Sep;97(9):3691-9; Crowe A, Teoh YK. J Drug Target, 2006, 14:291–300.	3	2/4	Annex 8: Proposal to waive in vivo bioequivalence requirements for WHO Model List of Essential Medicines immediate-release, solid oral dosage forms; Technical Report Series No. 937; 40th; WHO Expert Committee on Specification for Pharmaceutical Preparations, WHO Technical Report Series, No. 937, 2006; pp 391– 461; http://www.who.int/medicines/publications/essentialmedicines/en/index.html (accesse…	Large maximum dose causes a large dose number and therefore low solubility definition according to FDA guidelines	x
4	Gemfibrozil	>0.5	-4.40671	Huang L, Berry L, Ganga S, et al, Drug Metab Dispos. 2010 Feb;38(2):223-31.	1	2	Bergman E, Matsson EM, Hedeland M, et al., J Clin Pharmacol. 2010 Sep;50(9):1039-49	Large maximum dose causes a large dose number and therefore low solubility definition according to FDA guidelines	x
5	Biperiden	0.01 (PI)	-4.08145	Abalos IS, Rodríguez YI, Lozano V, Environ Toxicol Pharmacol. 2012 Sep;34(2):223-7	2	1/3	Annex 8: Proposal to waive in vivo bioequivalence requirements for WHO Model List of Essential Medicines immediate-release, solid oral dosage forms; Technical Report Series No. 937; 40th; WHO Expert Committee on Specification for Pharmaceutical Preparations, WHO Technical Report Series, No. 937, 2006; pp 391– 461; http://www.who.int/medicines/publications/essentialmedicines/en/index.html (accesse…	The WHO BCS class assignment was on the basis on insufficient permeability data based on permeability data can now be assigned either 1/2 due to differences in free base and hydrochloride salt formulation	x
6	Paricalcitol	0.01 (PI)	-5.10292	Palaparthy R, Pradhan RS, Chan J, et al., Biopharm Drug Dispos. 2007 Mar;28(2):65-71	2	4	http://www.accessdata.fda.gov/drugsatfda_docs/nda/2005/021606s000_ClinPharmR.pdf (Accessed 5 Jan 2014)	Permeability is close to cut off threshold so with variability of caco-2 data could therefore be classed as poorly permeable, also HIA is less than 90% could explain why BCS assignment is wrong if based on in vivo data	x
7	Doxepin	0.03157	-4.266	Varma MV, Sateesh K, Panchagnula R., Mol Pharm. 2005 Jan-Feb;2(1):12-21	2	1	http://www.accessdata.fda.gov/drugsatfda_docs/nda/2010/022036Orig1s000ClinPharmR.pdf (accessed 18 December 2013)	Based on HCl salt assigned BCS class 1, solubility value based on free base	x
8	Vardenafil	0.11	-5.25181	Choi MK, Song IS., J Pharm Pharmacol. 2012 Aug;64(8):1074-83	4	2	http://www.ema.europa.eu/docs/en_GB/document_library/EPAR_-_Assessment_Report_-_Variation/human/000475/WC500097073.pdf (Accessed 5 Jan 2014) Choi MK, Song IS., J Pharm Pharmacol. 2012 Aug;64(8):1074-83.	Low permeability (in Caco-2) due to efflux effects by multiple transporters where as in MDCK-MDR1 higher permeability, differences between in vitro/in vivo. Based on %HIA of 90% this compound would be classed as highly absorbed. Choi MK, Song IS., J Pharm Pharmacol. 2012 Aug;64(8):1074-83	x
9	Pregabalin	32.1	-5.92812	Jezyk N, Li C, Stewart BH., et al., Pharm Res. 1999 Apr;16(4):519-26.	3	1	Cook, J., Addicks,W., Wu, YH., AAPS J. 2008 June; 10(2): 306–310.	Substrate for an Ltype uptake transporter therefore differences could be due to IVIV transporter expression. The literature states that caco-2 is not a suitable model for highlighting the effect of transporter mediated transport for this compound. Jezyk N, Li C, Stewart BH, Wu X, et al, Pharm Res. 1999 Apr;16(4):519-26. Su TZ, Feng MR, Weber ML., J Pharmacol Exp Ther. 2005 Jun;313(3):1406-15. Epu…	x
10	Aspirin	4.46	-5.31876	Irvine JD, Takahashi L, Lockhart K., et al., J Pharm Sci. 1999 Jan;88(1):28-33	3	1	Dressman JB, Nair A, Abrahamsson B, et al., J Pharm Sci. 2012 Aug;101(8):2653-67. doi: 10.1002/jps.23212. Epub 2012 Jun 6. Lindenberg M, Kopp S, Dressman JB., Eur J Pharm Biopharm. 2004 Sep;58(2):265-78.	A weak acid and is absorbed in lower part of the intestine (pH 5.4), permeability carried out at pH 7.4 therefore possibly explains low experimental permeability Levitt, D G. BMC Pharmacol Toxicol. 2013; 14: 34.	x
11	Cefixime	1 (SS)	-5.92082	Balimane PV, Chong S, Patel K., Arch Pharm Res. 2007 Apr;30(4):507-18	3	2/4	Annex 8: Proposal to waive in vivo bioequivalence requirements for WHO Model List of Essential Medicines immediate-release, solid oral dosage forms; Technical Report Series No. 937; 40th; WHO Expert Committee on Specification for Pharmaceutical Preparations, WHO Technical Report Series, No. 937, 2006; pp 391– 461; http://www.who.int/medicines/publications/essentialmedicines/en/index.html (accesse…	pH dependent solubility and literature states ionized at physiological pH therefore solubility could be lower as suspension pH is low (http://products.sanofi.ca/en/suprax.pdf (Accessed 5Jan2014)). Based on solubility definition according to FDA across a wide pH range could explain difference in solubility. Evidence suggests this compound is substrate for an influx carrier mediated transporter in …	x
12	Abacavir	1.68e-06	-5.46344	Shaik N, Giri N, Pan G., Drug Metab Dispos. 2007 Nov;35(11):2076-85	4	3	Annex 8: Proposal to waive in vivo bioequivalence requirements for WHO Model List of Essential Medicines immediate-release, solid oral dosage forms; Technical Report Series No. 937; 40th; WHO Expert Committee on Specification for Pharmaceutical Preparations, WHO Technical Report Series, No. 937, 2006; pp 391– 461; http://www.who.int/medicines/publications/essentialmedicines/en/index.html (accesse…	Experimental solubility value from free base of compound. However sulfate of compound is highly soluble (77mg/ml) and this could be why compound is classed as BCS class 3. In addition this compound is a substrate for pgp and this could explain the low permeability in the MDCK-MDR1 cell line http://www.accessdata.fda.gov/drugsatfda_docs/label/2013/020977s026,020978s030lbl.pdf (Accessed 6Jan 2014) …	x
13	Venlafaxine	<0.1	-4.66555	Wager , TT., Chandrasekaran, RY., Xinjun Hou, X., et al., ACS Chem. Neurosci., 2010, 1 (6), pp 420–434 Feng B, Mills JB, Davidson RE, et al.Drug Metab Dispos. 2008 Feb;36(2):268-75.	2	1	Ramirez E, Laosa O, Guerra P, Duque B, Mosquera B, Borobia AM, Lei SH, Carcas AJ, Frias J. Br J Clin Pharmacol 2010; 70: 694–702	Martindale states FS for hydrochloride salt, free base much lower solubility comapred with marketed product (hydrochloride salt 572 mg/ml). Therefore BCS differences due to formulation	x
14	Acetaminophen	14.475	-4.44788	Sherer, EC., Verras, A., Madeira, M., et al, Mol Inform, 2012, 31, 231–245 Chen LL, Yao J, Yang JB., et al, Acta Pharmacol Sin. 2005 Nov;26(11):1322-33	1	3	Kalantzi L, Reppas C, Dressman JB.., et al., J Pharm Sci. 2006 Jan;95(1):4-14. Annex 8: Proposal to waive in vivo bioequivalence requirements for WHO Model List of Essential Medicines immediate-release, solid oral dosage forms; Technical Report Series No. 937; 40th; WHO Expert Committee on Specification for Pharmaceutical Preparations, WHO Technical Report Series, No. 937, 2006; pp 391– 461; http…	Based on other in vitro/in situ tests compounds classed as poorly permeable in addition literature stated that in vivo absorption could be higher than 80% therefore differences between in vitro/in vivo and the thresholds used and the uncertaining surrounding this compounds assignment Kalantzi L, Reppas C, Dressman JB.., et al., J Pharm Sci. 2006 Jan;95(1):4-14.	x
15	Sertraline hydrochloride	4.24	-5.62893	Ingels, F., Oth, M., Augustijns, P., AAPS Annual Meeting and Exposition location:Baltimore date:November 7-11, 2004 (abstract) Feng B, Mills JB, Davidson RE,., et al., Drug Metab Dispos. 2008 Feb;36(2):268-75	3	1	Ramirez E, Laosa O, Guerra P., et al., Br J Clin Pharmacol. 2010 Nov;70(5):694-702. http://www.accessdata.fda.gov/drugsatfda_docs/label/2013/019839s079,020990s038lbl.pdf (Accessed 7 Jan 2014)	Compound is stated to be absorbed but very slowly therefore this could explain difference between classes, in addition this compound can inhibit certain transporters. Literature indicated compound (as hydrocloride salt) is slightly soluble. Inhibitor of pgp, PAT1(non competitive). Evidence suggests a pgp subtsrate and inhibitor Nielsen CU, Frølund S, Abdulhadi S et al., Br J Pharmacol. 2013 Nov;1…	x
16	Paroxetine	6.213	-5.45593	Wager , TT., Chandrasekaran, RY., Xinjun Hou, X., et al., ACS Chem. Neurosci., 2010, 1 (6), pp 420–434 Feng B, Mills JB, Davidson RE, et al.Drug Metab Dispos. 2008 Feb;36(2):268-75.	3	1	http://www.hma.eu/fileadmin/dateien/pipar/dk233paroxetinhexal/mod5_par_dk233_03_04_paroxetin_hexal_20060620.pdf (Accessed 13 Jan 2014)	Strong inhibitor of pgp and SERT, Conflicting literature stating whether or not this compound is a pgp substrate however efflux ratios collected from the literature seem to indicate it is a substrate and also a inhibitor Löscher, W., Potschka, H., NeuroRx. 2005 January; 2(1): 86–98. Maines LW, Antonetti DA, Wolpert EB., et al., Neuropharmacology. 2005 Oct;49(5):610-7. Maines LW, Antonetti DA, Wol…	x
17	Mirtazapine	0.01 (PI)	-4.5867	Wager , TT., Chandrasekaran, RY., Xinjun Hou, X., et al., ACS Chem. Neurosci., 2010, 1 (6), pp 420–434	2	1/2	Ramirez E, Laosa O, Guerra P., et al., Br J Clin Pharmacol. 2010 Nov;70(5):694-702. http://www.pfizer.ca/en/our_products/products/monograph/320	http://www.mhra.gov.uk/home/groups/l-unit1/documents/websiteresources/con2032430.pdf (accessed 15 Jan 2014) indicated pH dependent solubility, high pH becomes less soluble. Could be highly soluble if used label information (slighly soluble 1mg/ml) compared with martindale (PI 0.01mg/ml) which would be poorly soluble- we took solubility for the worse possible scenario therefore 0.01mg/ml was used	x
18	Isoniazid	122.8	-4.66354	Ranaldi, G., Islam, K, Sambuy, Y., Antimicrob Agents Chemother. 1992 July; 36(7): 1374–1381	1	1/3	Annex 8: Proposal to waive in vivo bioequivalence requirements for WHO Model List of Essential Medicines immediate-release, solid oral dosage forms; Technical Report Series No. 937; 40th; WHO Expert Committee on Specification for Pharmaceutical Preparations, WHO Technical Report Series, No. 937, 2006; pp 391– 461; http://www.who.int/medicines/publications/essentialmedicines/en/index.html (accesse…	x
19	Ethosuximide	190	-4.57187	Feng B, Mills JB, Davidson RE,., et al., Drug Metab Dispos. 2008 Feb;36(2):268-75	1	1/3	Annex 8: Proposal to waive in vivo bioequivalence requirements for WHO Model List of Essential Medicines immediate-release, solid oral dosage forms; Technical Report Series No. 937; 40th; WHO Expert Committee on Specification for Pharmaceutical Preparations, WHO Technical Report Series, No. 937, 2006; pp 391– 461; http://www.who.int/medicines/publications/essentialmedicines/en/index.html (accesse…	x
20	Clomipramine	100 (FS)	-4.43297	Varma MV, Sateesh K, Panchagnula R., Mol Pharm. 2005 Jan-Feb;2(1):12-21	1	1/3	Annex 8: Proposal to waive in vivo bioequivalence requirements for WHO Model List of Essential Medicines immediate-release, solid oral dosage forms; Technical Report Series No. 937; 40th; WHO Expert Committee on Specification for Pharmaceutical Preparations, WHO Technical Report Series, No. 937, 2006; pp 391– 461; http://www.who.int/medicines/publications/essentialmedicines/en/index.html (accesse…	x
21	Furosemide	0.0062	-6.23545	Rege BD, Yu LX, Hussain AS., et al., J Pharm Sci. 2001 Nov;90(11):1776-86 Irvine JD, Takahashi L, Lockhart K., et al., J Pharm Sci. 1999 Jan;88(1):28-33; Varma MV, Gardner I, Steyn SJ., et al., Mol Pharm. 2012 May 7;9(5):1199-212	4	2/4	Annex 8: Proposal to waive in vivo bioequivalence requirements for WHO Model List of Essential Medicines immediate-release, solid oral dosage forms; Technical Report Series No. 937; 40th; WHO Expert Committee on Specification for Pharmaceutical Preparations, WHO Technical Report Series, No. 937, 2006; pp 391– 461; http://www.who.int/medicines/publications/essentialmedicines/en/index.html (accesse…	x
22	Amoxicillin	4	-6.47496	Sherer, EC., Verras, A., Madeira, M., et al, Mol Inform, 2012, 31, 231–245 Irvine JD, Takahashi L, Lockhart K., et al., J Pharm Sci. 1999 Jan;88(1):28-33	3	1/3	Annex 8: Proposal to waive in vivo bioequivalence requirements for WHO Model List of Essential Medicines immediate-release, solid oral dosage forms; Technical Report Series No. 937; 40th; WHO Expert Committee on Specification for Pharmaceutical Preparations, WHO Technical Report Series, No. 937, 2006; pp 391– 461; http://www.who.int/medicines/publications/essentialmedicines/en/index.html (accesse…	x
23	Antipyrine	637	-4.31216	Varma MV, Gardner I, Steyn SJ., et al., Mol Pharm. 2012 May 7;9(5):1199-212; Varma MV, Sateesh K, Panchagnula R., Mol Pharm. 2005 Jan-Feb;2(1):12-21 Yamashita S, Furubayashi T, Kataoka M.,European J Pharm Sci, 2000, 10, 195-204; Hilgendorf C, Spahn-Langguth H, Regårdh CG., J Pharm Sci, 2000, 89, 63-75; Garberg P, Ball M, Borg N., et al., Toxicol In Vitro. 2005 Apr;19(3):299-334; Jung SJ, Choi SO,…	1	1/2	http://www.fda.gov/downloads/Drugs/.../Guidances/ucm070246.pdf (Accessed 19 December 2013)	x
24	Rilpivirine	0.01 (PI)	-4.92372	http://www.accessdata.fda.gov/drugsatfda_docs/nda/2011/202022Orig1s000ClinPharmR.pdf	2	2	Mathias, A., Mennin, M., Wiser, L., J Bioequiv Availab 2012, 4: 100-105	x
25	Cinacalcet	<0.001	-5.23657	http://www.accessdata.fda.gov/drugsatfda_docs/nda/2004/21-688.pdf_Sensipar_BioPharmr.pdf	4	4	http://www.accessdata.fda.gov/drugsatfda_docs/nda/2004/21-688.pdf_Sensipar_BioPharmr.pdf (Accessed 7 Jan 2014)	x
26	Metronidazole	10.3	-4.73518	Varma MV, Gardner I, Steyn SJ., et al., Mol Pharm. 2012 May 7;9(5):1199-212	1	1	Annex 8: Proposal to waive in vivo bioequivalence requirements for WHO Model List of Essential Medicines immediate-release, solid oral dosage forms; Technical Report Series No. 937; 40th; WHO Expert Committee on Specification for Pharmaceutical Preparations, WHO Technical Report Series, No. 937, 2006; pp 391– 461; http://www.who.int/medicines/publications/essentialmedicines/en/index.html (accesse…	x
27	Voriconazole	0.1 (VSS)	-4.55129	Damle B, Varma MV, Wood N., Antimicrob Agents Chemother. 2011 Nov;55(11):5172-7	2	2	http://www.accessdata.fda.gov/drugsatfda_docs/nda/2003/021630s000_Vfend_ClinPharm.pdf (Accessed 19 December 2013)	x
28	Ethambutol	649	-6.09691	Varma MV, Gardner I, Steyn SJ., et al., Mol Pharm. 2012 May 7;9(5):1199-212	3	3	Annex 8: Proposal to waive in vivo bioequivalence requirements for WHO Model List of Essential Medicines immediate-release, solid oral dosage forms; Technical Report Series No. 937; 40th; WHO Expert Committee on Specification for Pharmaceutical Preparations, WHO Technical Report Series, No. 937, 2006; pp 391– 461; http://www.who.int/medicines/publications/essentialmedicines/en/index.html (accesse…	x
29	Pyridostigmine	1000 (VS)	-5.9914	Varma MV, Sateesh K, Panchagnula R., Mol Pharm. 2005 Jan-Feb;2(1):12-21	3	3	Annex 8: Proposal to waive in vivo bioequivalence requirements for WHO Model List of Essential Medicines immediate-release, solid oral dosage forms; Technical Report Series No. 937; 40th; WHO Expert Committee on Specification for Pharmaceutical Preparations, WHO Technical Report Series, No. 937, 2006; pp 391– 461; http://www.who.int/medicines/publications/essentialmedicines/en/index.html (accesse…	x
30	Ascorbic_Acid	249	-5.14297	Lu Z, Chen W, Viljoen A., et al., Phytother Res. 2010 Feb;24(2):211-8 Luo S, Wang Z, Kansara V, et al., Int J Pharm. 2008 Jun 24;358(1-2):168-76	1	1	Annex 8: Proposal to waive in vivo bioequivalence requirements for WHO Model List of Essential Medicines immediate-release, solid oral dosage forms; Technical Report Series No. 937; 40th; WHO Expert Committee on Specification for Pharmaceutical Preparations, WHO Technical Report Series, No. 937, 2006; pp 391– 461; http://www.who.int/medicines/publications/essentialmedicines/en/index.html (accesse…	x
31	Propranolol	360	-4.47991	Varma MV, Sateesh K, Panchagnula R., Mol Pharm. 2005 Jan-Feb;2(1):12-21; Mahar Doan KM, Humphreys JE, Webster LO, et al., J Pharmacol Exp Ther. 2002 Dec;303(3):1029-37 Skolnik S, Lin X, Wang J., et al., J Pharm Sci, 2010, 99, 3246-65	1	1	Annex 8: Proposal to waive in vivo bioequivalence requirements for WHO Model List of Essential Medicines immediate-release, solid oral dosage forms; Technical Report Series No. 937; 40th; WHO Expert Committee on Specification for Pharmaceutical Preparations, WHO Technical Report Series, No. 937, 2006; pp 391– 461; http://www.who.int/medicines/publications/essentialmedicines/en/index.html (accesse…	x
32	Ranitidine	550	-6.25767	Varma MV, Gardner I, Steyn SJ., et al., Mol Pharm. 2012 May 7;9(5):1199-212 Rege BD, Yu LX, Hussain AS., et al., J Pharm Sci. 2001 Nov;90(11):1776-86	3	3	Annex 8: Proposal to waive in vivo bioequivalence requirements for WHO Model List of Essential Medicines immediate-release, solid oral dosage forms; Technical Report Series No. 937; 40th; WHO Expert Committee on Specification for Pharmaceutical Preparations, WHO Technical Report Series, No. 937, 2006; pp 391– 461; http://www.who.int/medicines/publications/essentialmedicines/en/index.html (accesse…	x
33	Atenolol	26.5	-6.09745	Yazdanian, M., Glynn, SL., Wright, JL., Pharm Res, 1998, 15, 1490-1494; Yamashita S, Furubayashi T, Kataoka M.,European J Pharm Sci, 2000, 10, 195-204; Hilgendorf C, Spahn-Langguth H, Regårdh CG., J Pharm Sci, 2000, 89, 63-75; Jung SJ, Choi SO, Um SY., et al., J Pharm Biomed Anal. 2006 May 3;41(2):469-75; Stenberg P, Norinder U, Luthman K., et al., J med chem 2001;44(12):1927-37; Nordqvist, A., N…	3	3	Annex 8: Proposal to waive in vivo bioequivalence requirements for WHO Model List of Essential Medicines immediate-release, solid oral dosage forms; Technical Report Series No. 937; 40th; WHO Expert Committee on Specification for Pharmaceutical Preparations, WHO Technical Report Series, No. 937, 2006; pp 391– 461; http://www.who.int/medicines/publications/essentialmedicines/en/index.html (accesse…	x
34	Dapsone	0.15	-4.95703	Monteiro LM, Lione VF, do Carmo FA., et al, Int J Nanomedicine. 2012;7:5175-82	2	2	Annex 8: Proposal to waive in vivo bioequivalence requirements for WHO Model List of Essential Medicines immediate-release, solid oral dosage forms; Technical Report Series No. 937; 40th; WHO Expert Committee on Specification for Pharmaceutical Preparations, WHO Technical Report Series, No. 937, 2006; pp 391– 461; http://www.who.int/medicines/publications/essentialmedicines/en/index.html (accesse…	x
35	Diethylcarbamazine	1000 (VS)	-4.88074	Kogan A, Kesselman E, Danino D., Colloids Surf B Biointerfaces. 2008 Oct 1;66(1):1-12	1	1	Lindenberg M, Kopp S, Dressman JB., Eur J Pharm Biopharm. 2004 Sep;58(2):265-78.	x
36	Pramipexole	>10	-4.89279	Wager , TT., Chandrasekaran, RY., Xinjun Hou, X., et al., ACS Chem. Neurosci., 2010, 1 (6), pp 420–434	1	1	http://www.accessdata.fda.gov/drugsatfda_docs/nda/2010/022421s000chemr.pdf (accessed 19 December 2013)	x
37	Theophylline	7.55	-4.50543	Varma MV, Gardner I, Steyn SJ., et al., Mol Pharm. 2012 May 7;9(5):1199-212 Sherer, EC., Verras, A., Madeira, M., et al, Mol Inform, 2012, 31, 231–245	1	1	Lindenberg M, Kopp S, Dressman JB., Eur J Pharm Biopharm. 2004 Sep;58(2):265-78.	x
38	Glimepiride	>0.0736	-4.51713	Frick A., Helga Mo, H., Wirbitzki, E., European Journal of Pharmaceutics and Biopharmaceutics 46 (1998) 305–311	2	2	Taupitz T, Dressman JB, Klein S., Eur J Pharm Biopharm. 2013 May;84(1):208-18. Nagpal, M., Rajera, R., Nagpa, k. ,Int J Pharm Investig. 2012 Jan-Mar; 2(1): 42–47.	x
39	Perphenazine	0.02828	-4.5157	Varma MV, Sateesh K, Panchagnula R., Mol Pharm. 2005 Jan-Feb;2(1):12-21	2	2	Baboota, S., Abdullah, M., Gulam; Sahni,G., et al., J. Excipients and Food Chem. Mar2013, Vol. 4 Issue 1, p12-24.	x
40	Enzalutamide	0.002	-4.50864	http://www.accessdata.fda.gov/drugsatfda_docs/nda/2012/203415Orig1s000ClinPharmR.pdf	2	2	http://www.accessdata.fda.gov/drugsatfda_docs/nda/2012/203415Orig1s000ClinPharmR.pdf (Accessed 19Dec2013)	x
41	Clonazepam	0.1	-4.50724	Wager , TT., Chandrasekaran, RY., Xinjun Hou, X., et al., ACS Chem. Neurosci., 2010, 1 (6), pp 420–434	2	2	S S, S A, Krishnamoorthy K, Rajappan M., J Pharm Pharm Sci. 2012;15(1):103-11. Nainar, S., Rajiah, K., Angamuthu, S., et al, Nainar et al, Trop J Pharm Res, April 2012;11 (2):319-329	x
42	Loratadine	0.01	-4.42946	Varma MV, Sateesh K, Panchagnula R., Mol Pharm. 2005 Jan-Feb;2(1):12-21 Khan MZ, Rausl D, Zanoski R., Biol Pharm Bull. 2004 Oct;27(10):1630-5	2	2	Khan MZ, Rausl D, Zanoski R, et al, Biol Pharm Bull. 2004 Oct;27(10):1630-5. Ramirez E, Laosa O, Guerra P, Duque B, Mosquera B, Borobia AM, Lei SH, Carcas AJ, Frias J. Br J Clin Pharmacol 2010; 70: 694–702	x
43	Carbamazepine	0.15	-4.34104	Varma MV, Gardner I, Steyn SJ., et al., Mol Pharm. 2012 May 7;9(5):1199-212; Varma MV, Sateesh K, Panchagnula R., Mol Pharm. 2005 Jan-Feb;2(1):12-21 Skolnik S, Lin X, Wang J., et al., J Pharm Sci, 2010, 99, 3246-65	2	2	Kovacević I, Parojcić J, Homsek I, et al, Mol Pharm. 2009 Jan-Feb;6(1):40-7.	x
44	Lercanidipine	0.005	-7.30103	US Patent 2006/0073200 A1, Serial number EP1807059 A1	4	4	Granero, G. E.; Longhi, M. R.; Mora, M. et al. J Pharm Sci 2010, 99, 2544-2556.	x
45	Trospium	500	-6.82974	Langgutha, P., Kubisb, A., Krumbiegel, G., Eur J Pharm Biopharm, 1997 Jun 43(3): 265–272	3	3	Radwan A, Amidon GL, Langguth P., Biopharm Drug Dispos. 2012 Oct;33(7):403-16.	x
46	Crizotinib	<0.1	-5.16973	http://www.accessdata.fda.gov/drugsatfda_docs/nda/2011/202570Orig1s000ClinPharmR.pdf	4	4	http://www.ema.europa.eu/docs/en_GB/document_library/EPAR_-_Public_assessment_report/human/002489/WC500134761.pdf (Accessed 19 December 2013)	x
47	Caffeine	21.6	-4.41985	Varma MV, Gardner I, Steyn SJ., et al., Mol Pharm. 2012 May 7;9(5):1199-212 Feng B, Mills JB, Davidson RE, et al.Drug Metab Dispos. 2008 Feb;36(2):268-75. Yazdanian, M., Glynn, SL., Wright, JL., Pharm Res, 1998, 15, 1490-1494; Garberg P, Ball M, Borg N., et al., Toxicol In Vitro. 2005 Apr;19(3):299-334; Jung SJ, Choi SO, Um SY., et al., J Pharm Biomed Anal. 2006 May 3;41(2):469-75 Grès MC, Julian…	1	1	Wu CY, Benet LZ., Pharm Res. 2005 Jan;22(1):11-23. Smetanova L, Stetinova V, Kholova D,et al, Neuro Endocrinol Lett. 2009;30 Suppl 1:101-5.	x
48	Memantine	38.6	-4.36251	Beconi, MG., Howland, D., Park, L., et al., PLoS Curr. 2011 December 15	1	1	http://www.accessdata.fda.gov/drugsatfda_docs/nda/2003/21-487_namenda_bioeqr_p1.pdf (Accessed 19 December 2013) http://www.accessdata.fda.gov/drugsatfda_docs/nda/2005/021627s000_namenda_clinpharmr.pdf (Acessed 13 January 2014)	x
49	Gliclazide	0.025	-4.60206	Stetinova, Polaskova, Smetanova, et al., Toxicology Letters, 2008, 180	2	2	Benet LZ, Broccatelli F, Oprea TI., AAPS J. 2011 Dec;13(4):519-47 Grbic, S., Parojcic, J., Ibric, S,. et al, AAPS PharmSciTech. 2011 March; 12(1): 165–171.	x
50	Cimetidine	9.3	-5.91098	Varma MV, Gardner I, Steyn SJ., et al., Mol Pharm. 2012 May 7;9(5):1199-212; Varma MV, Sateesh K, Panchagnula R., Mol Pharm. 2005 Jan-Feb;2(1):12-21 Skolnik S, Lin X, Wang J., et al., J Pharm Sci, 2010, 99, 3246-65	3	3	Jantratid E, Prakongpan S, Dressman JB, et al., J Pharm Sci. 2006 May;95(5):974-84.	x
51	Clopidogrel bisulfate	0.01	-4.8962	Ki MH, Choi MH, Ahn KB., et al, Arch Pharm Res. 2008 Feb;31(2):250-8	2	2	Ramirez E, Laosa O, Guerra P, Duque B, Mosquera B, Borobia AM, Lei SH, Carcas AJ, Frias J. Br J Clin Pharmacol 2010; 70: 694–702 Lassoued MA, Khemiss F, Sfar S., J Pharm Pharm Sci. 2011;14(1):117-27.	x
52	Nalidixic_Acid	0.1	-3.84406	Ranaldi, G., Islam, K, Sambuy, Y., Antimicrob Agents Chemother. 1992 July; 36(7): 1374–1381	2	2	Excipient Development for Pharmaceutical, Biotechnology, and Drug Delivery Systems, Ed: Ashok Katdare, A., Mahesh Chaubal, M., CRC Press; 1 edition, New York, pg 191	x
53	Glyburide	0.031	-4.6135	Varma MV, Gardner I, Steyn SJ., et al., Mol Pharm. 2012 May 7;9(5):1199-212 Zerrouk N, Corti G, Ancillotti S., Eur J Pharm Biopharm. 2006 Apr;62(3):241-6	2	2	Wei H, Löbenberg R., Eur J Pharm Sci. 2006 Sep;29(1):45-52.	x
54	Quinine	0.5497	-4.49757	Crivori , P., Reinach, B. , Pezzetta, D., et al., Mol. Pharm. , 2006, 3, 33–44	1	1	Annex 8: Proposal to waive in vivo bioequivalence requirements for WHO Model List of Essential Medicines immediate-release, solid oral dosage forms; Technical Report Series No. 937; 40th; WHO Expert Committee on Specification for Pharmaceutical Preparations, WHO Technical Report Series, No. 937, 2006; pp 391– 461; http://www.who.int/medicines/publications/essentialmedicines/en/index.html (accesse…	x
55	Metoprolol	43	-4.67737	Varma MV, Gardner I, Steyn SJ., et al., Mol Pharm. 2012 May 7;9(5):1199-212; Varma MV, Sateesh K, Panchagnula R., Mol Pharm. 2005 Jan-Feb;2(1):12-21 Skolnik S, Lin X, Wang J., et al., J Pharm Sci, 2010, 99, 3246-65	1	1	Tsume Y, Amidon GL., Mol Pharm. 2010 Aug 2;7(4):1235-43.	x
56	Ruxolitinib	2.7	-4.66756	http://www.accessdata.fda.gov/drugsatfda_docs/nda/2011/202192Orig1s000ClinPharmR.pdf	1	1	http://ec.europa.eu/health/documents/community-register/2012/20120823123254/anx_123254_en.pdf (Accessed 2 January 2014)	x
57	Itraconazole	0.004	-4.82391	Varma MV, Gardner I, Steyn SJ., et al., Mol Pharm. 2012 May 7;9(5):1199-212	2	2	http://www.accessdata.fda.gov/drugsatfda_docs/nda/2010/022484Orig1s000ClinPharmR.pdf (Accessed 2 Jan 2014)	x
58	Nimodipine	0.00305461	-4.81248	Wager , TT., Chandrasekaran, RY., Xinjun Hou, X., et al., ACS Chem. Neurosci., 2010, 1 (6), pp 420–434	2	2	Papageorgiou, G. Z., Docoslis, A., Georgarakis, M., et al, J therm anal calorim, 2009, 95(3), 903-915.	x
59	Galantamine Hydrobromine	31	-4.80688	Wager , TT., Chandrasekaran, RY., Xinjun Hou, X., et al., ACS Chem. Neurosci., 2010, 1 (6), pp 420–434	1	1	http://www.accessdata.fda.gov/drugsatfda_docs/nda/2001/21-224_REMINYL_biopharmr.pdf (accessed 13 Jan 2014)	x
60	Norfloxacin	0.19	-5.62709	Skolnik S, Lin X, Wang J., et al., J Pharm Sci, 2010, 99, 3246-65	4	4	Breda SA, Jimenez-Kairuz AF, Manzo RH, et al., Int J Pharm. 2009 Apr 17;371(1-2):106-13. doi: 10.1016/j.ijpharm.2008.12.026. Epub 2008 Dec 27.	x
61	Phenylbutazone	0.034	-4.99827	Khan S, Batchelor H, Hanson P., et al., J Pharm Sci. 2011 May 10	2	2	Anagha Bhakay, A., Rajesh Davé, R., Ecevit Bilgili, E., Powder Technology, 2013, 236, 221–234	x
62	Amphotericin_B	0.003	-6.92082	Skolnik S, Lin X, Wang J., et al., J Pharm Sci, 2010, 99, 3246-65	4	4	Wu CY, Benet LZ., Pharm Res. 2005 Jan;22(1):11-23. Yáñez JA, Remsberg CM, Sayre CL, et al.,Ther Deliv. 2011 May;2(5):643-72. doi: 10.4155/tde.11.19.	x
63	Milnacipran	100 (FS)	-5.05061	Dyck B, Tamiya J, Jovic F., et al., J Med Chem. 2008 Nov 27;51(22):7265-72	1	1	http://www.accessdata.fda.gov/drugsatfda_docs/nda/2009/022256s000_CDTLMemo.pdf(accessed 19 December 2019)	x
64	Quetiapine	0.4	-4.66154	Wager , TT., Chandrasekaran, RY., Xinjun Hou, X., et al., ACS Chem. Neurosci., 2010, 1 (6), pp 420–434	2	2	http://www.accessdata.fda.gov/drugsatfda_docs/nda/2007/022047Orig1s000ChemR.pdf (Accessed 2 Jan 2014)	x
65	Hydrocodone	33 (S)	-4.60642	Wager , TT., Chandrasekaran, RY., Xinjun Hou, X., et al., ACS Chem. Neurosci., 2010, 1 (6), pp 420–434 Feng B, Mills JB, Davidson RE, et al.Drug Metab Dispos. 2008 Feb;36(2):268-75.	1	1	Hemmingsen, PH., Haahr, AM., Gunnergaard, C., et al, Pharmaceutics 2011, 3(1)	x
66	Olanzapine	0.01 (PI)	-4.72584	Wager , TT., Chandrasekaran, RY., Xinjun Hou, X., et al., ACS Chem. Neurosci., 2010, 1 (6), pp 420–434	2	2	Thakuria, R., A. Nangia, CrystEngComm, 2011 13(6): 1759-1764. Dixit, M., A. G. Kini, et al. Braz. J. Pharm. Sci. 2011 47: 743-749.	x
67	Rivaroxaban	0.01 (PI)	-5.09151	Gnoth MJ, Buetehorn U, Muenster U., et al., J Pharmacol Exp Ther. 2011 Jul;338(1):372-80	2	2	http://www.accessdata.fda.gov/drugsatfda_docs/nda/2011/202439Orig1s000ClinPharmR.pdf (Accessed 5 jan 2014)	x
68	Citalopram Hydrobromide	100 (FS)	-4.81389	Wager , TT., Chandrasekaran, RY., Xinjun Hou, X., et al., ACS Chem. Neurosci., 2010, 1 (6), pp 420–434 Feng B, Mills JB, Davidson RE, et al.Drug Metab Dispos. 2008 Feb;36(2):268-75. http://www.acrossbarriers.eu/uploads/media/FCT02-I-0305_BCS.pdf	1	1	Ramirez E, Laosa O, Guerra P, Duque B, Mosquera B, Borobia AM, Lei SH, Carcas AJ, Frias J. Br J Clin Pharmacol 2010; 70: 694–702	x
69	Cefotaxime	100 (FS)	-5.80688	Raeissi, SD., Li, L. . Hidalgo, IJ., J Pharm Pharmacol, 1999, 51, 35–40	3	3	Sharma P, Varma MV, Chawla HP, et al, Farmaco. 2005 Nov-Dec;60(11-12):874-83. Epub 2005 Oct 21. Sharma P, Varma MV, Chawla HP, et al, Farmaco. 2005 Nov-Dec;60(11-12):870-3. Epub 2005 Sep 21.	x
70	Methylphenidate	100 (FS)	-4.57675	Wager , TT., Chandrasekaran, RY., Xinjun Hou, X., et al., ACS Chem. Neurosci., 2010, 1 (6), pp 420–434 Feng B, Mills JB, Davidson RE, et al.Drug Metab Dispos. 2008 Feb;36(2):268-75.	1	1	http://www.ema.europa.eu/docs/en_GB/document_library/Referrals_document/Methylphenidate_Hexal/WC500156885.pdf (Accessed 13 Jan 2014)	x
71	Indomethacin	0.002	-4.37696	Varma MV, Gardner I, Steyn SJ., et al., Mol Pharm. 2012 May 7;9(5):1199-212; Varma MV, Sateesh K, Panchagnula R., Mol Pharm. 2005 Jan-Feb;2(1):12-21 Sherer, EC., Verras, A., Madeira, M., et al, Mol Inform, 2012, 31, 231–245	2	2	ElShaer A, Khan S, Perumal D., et al., Curr Drug Deliv. 2011 Jul;8(4):363-72. Clarysse S, Psachoulias D, Brouwers J., et al., Pharm Res. 2009 Jun;26(6):1456-66.	x
72	Tiagabine	10 (SPS)	-4.68403	Wager , TT., Chandrasekaran, RY., Xinjun Hou, X., et al., ACS Chem. Neurosci., 2010, 1 (6), pp 420–434	1
73	Ribavirin	142	-6.74473	Li F, Hong L, Mau CI., et al., J Pharm Sci. 2006 Jun;95(6):1318-25	3
74	Atazanavir sulfate	4.5	-5.92082	Kis O, Zastre JA, Hoque MT., et al, Pharm Res. 2013 Apr;30(4):1050-64	3
75	Mexiletine	100 (FS)	-3.91578	Catalano A, Desaphy JF, Lentini G., et al., J Med Chem. 2012 Feb 9;55(3):1418-22	1
76	Mefloquine	1.806	-5.02687	Milner E, McCalmont W, Bhonsle J., et al., Malar J. 2010 Feb 11;9:5	1
77	Acamprosate	100 (FS)	-5.9859	Zornoza T, Cano-Cebrián MJ, Nalda-Molina R, European J Pharm Sci, 2004, 22, 347-56	3
78	Selegiline	100 (FS)	-4.15304	Varma MV, Sateesh K, Panchagnula R., Mol Pharm. 2005 Jan-Feb;2(1):12-21	1
79	Cefamandole_Nafate	100 (FS)	-5.64975	Raeissi, SD., Li, L. . Hidalgo, IJ., J Pharm Pharmacol, 1999, 51, 35–40	3
80	Doxapram	10 (SPS)	-4.34582	Varma MV, Sateesh K, Panchagnula R., Mol Pharm. 2005 Jan-Feb;2(1):12-21	1
81	Methysergide	1 (SS)	-4.75945	Varma MV, Sateesh K, Panchagnula R., Mol Pharm. 2005 Jan-Feb;2(1):12-21	1
82	Dofetilide	0.1 (VSS)	-4.8041	Singleton DH, Boyd H, Steidl-Nichols JV., et al, J Med Chem. 2007 Jun 28;50(13):2931-41	2
83	Zonisamide	0.8	-4.53611	Wager , TT., Chandrasekaran, RY., Xinjun Hou, X., et al., ACS Chem. Neurosci., 2010, 1 (6), pp 420–434	1
84	Ramelteon	0.21	-4.47625	Wager , TT., Chandrasekaran, RY., Xinjun Hou, X., et al., ACS Chem. Neurosci., 2010, 1 (6), pp 420–434	1
85	Trimipramine	0.0048	-4.39254	Varma MV, Sateesh K, Panchagnula R., Mol Pharm. 2005 Jan-Feb;2(1):12-21	2
86	Tacrine	0.92	-4.58269	Varma MV, Sateesh K, Panchagnula R., Mol Pharm. 2005 Jan-Feb;2(1):12-21 Marasanapalle VP, Crison JR, Ma J., et al., Biopharm Drug Dispos. 2009 Mar;30(2):71-80	1
87	Darifenacin hydrobromide	6.03	-4.72125	Skerjanec, A., Clin Pharmacokinet, 2006, 45, 325-50	1
88	Flumazenil	0.1 (VSS)	-4.22403	Varma MV, Sateesh K, Panchagnula R., Mol Pharm. 2005 Jan-Feb;2(1):12-21	2
89	Piperacillin	100 (FS)	-7.48812	Violette A, Cortes DA, Bergeon JA., et al., Int J Pharm. 2008 Mar 3;351(1-2):152-7	3
90	Naltrexone	100 (FS)	-4.5583	Varma MV, Sateesh K, Panchagnula R., Mol Pharm. 2005 Jan-Feb;2(1):12-21 Kanaan M, Daali Y, Dayer P., et al., Fundam Clin Pharmacol. 2009 Oct;23(5):543-8	1
91	Cefadroxil	1 (SS)	-5.05552	Raeissi, SD., Li, L. . Hidalgo, IJ., J Pharm Pharmacol, 1999, 51, 35–40	1
92	Dolasetron	100 (FS)	-4.88941	Dow J, Francesco GF, Berg C., J Pharm Sci. 1996 Jul;85(7):685-9	1
93	Reboxetine	250	-4.91364	Wager , TT., Chandrasekaran, RY., Xinjun Hou, X., et al., ACS Chem. Neurosci., 2010, 1 (6), pp 420–434	1
94	Oseltamivir phosphate	>500	-5.20936	Oo C, Snell P, Barrett J., et al., Int J Pharm. 2003 May 12;257(1-2):297-9 Wen, G., Jia, R., Kardos, P., et al., The AAPS Journal. 2006; 8(S2) (Abstract)	3
95	Rivastigmine	1000 (VS)	-4.56384	Wager , TT., Chandrasekaran, RY., Xinjun Hou, X., et al., ACS Chem. Neurosci., 2010, 1 (6), pp 420–434	1
96	Riluzole	0.1 (VSS)	-4.51713	Wager , TT., Chandrasekaran, RY., Xinjun Hou, X., et al., ACS Chem. Neurosci., 2010, 1 (6), pp 420–434	2
97	Zaleplon	0.01 (PI)	-4.43063	Wager , TT., Chandrasekaran, RY., Xinjun Hou, X., et al., ACS Chem. Neurosci., 2010, 1 (6), pp 420–434	2
98	UK-294,315	0.74	-4.95078	Harrison A, Betts A, Fenner K, et al, Drug Metab Dispos, 2004, 32,197-204.	1
99	Nalbuphine hydrochloride	35.5	-4.85387	Varma MV, Sateesh K, Panchagnula R., Mol Pharm. 2005 Jan-Feb;2(1):12-21	1
100	Prazosin	0.0032	-5.01886	Varma MV, Sateesh K, Panchagnula R., Mol Pharm. 2005 Jan-Feb;2(1):12-21; Di L, Whitney-Pickett C, Umland JP., et al., J Pharm Sci. 2011 Nov;100(11):4974-85 Skolnik S, Lin X, Wang J., et al., J Pharm Sci, 2010, 99, 3246-65	2
101	Minocycline	52	-5.3098	Varma MV, Gardner I, Steyn SJ., et al., Mol Pharm. 2012 May 7;9(5):1199-212	3
102	Ropinirole Hydrochloride	133	-4.57025	Wager , TT., Chandrasekaran, RY., Xinjun Hou, X., et al., ACS Chem. Neurosci., 2010, 1 (6), pp 420–434	1
103	Cephalothin	0.457	-5.34872	Raeissi, SD., Li, L. . Hidalgo, IJ., J Pharm Pharmacol, 1999, 51, 35–40	3
104	Norethindrone	0.00633	-4.76981	Faassen, F., Kelder, J., Lenders, J., et al., Pharm Res February 2003, Volume 20, Issue 2, pp 177-186 Kim WY, Benet LZ., Pharm Res. 2004 Jul;21(7):1284-93	2
105	Propoxyphene	0.0037	-4.65956	Feng B, Mills JB, Davidson RE,., et al., Drug Metab Dispos. 2008 Feb;36(2):268-75	2
106	Flurazepam	500	-4.15181	Varma MV, Sateesh K, Panchagnula R., Mol Pharm. 2005 Jan-Feb;2(1):12-21	1
107	Cefaclor	10	-5.82391	Balimane PV, Chong S, Patel K., Arch Pharm Res. 2007 Apr;30(4):507-18	3
108	Terbutaline	90	-5.77211	Skolnik S, Lin X, Wang J., et al., J Pharm Sci, 2010, 99, 3246-65 Irvine JD, Takahashi L, Lockhart K., et al., J Pharm Sci. 1999 Jan;88(1):28-33	3
109	Maprotiline	0.0008334	-4.34199	Varma MV, Sateesh K, Panchagnula R., Mol Pharm. 2005 Jan-Feb;2(1):12-21	2
110	Oxycodone	142.9	-4.63827	Wager , TT., Chandrasekaran, RY., Xinjun Hou, X., et al., ACS Chem. Neurosci., 2010, 1 (6), pp 420–434 Hassan HE, Myers AL, Lee IJ, et al., J Pharm Sci. 2007 Sep;96(9):2494-506	1
111	Pheniramine	11.05	-4.75362	Varma MV, Sateesh K, Panchagnula R., Mol Pharm. 2005 Jan-Feb;2(1):12-21 Marasanapalle VP, Crison JR, Ma J., et al., Biopharm Drug Dispos. 2009 Mar;30(2):71-81	1
112	Cilostazol	0.000101	-4.69897	Young AM, Audus KL, Proudfoot J., J Pharm Sci. 2006 Apr;95(4):717-25	2
113	Methimazole	~200	-4.31876	Sköld C, Winiwarter S, Wernevik J., et al., J Med Chem. 2006 Nov 16;49(23):6660-71	1
114	Famciclovir	20	-5.14752	Varma MV, Sateesh K, Panchagnula R., Mol Pharm. 2005 Jan-Feb;2(1):12-21	1
115	Nitrazepam	0.043	-4.41005	Varma MV, Sateesh K, Panchagnula R., Mol Pharm. 2005 Jan-Feb;2(1):12-21	2
116	Hydroxyzine	100 (FS)	-5.0348	Laitinen L, Kangas H, Kaukonen AM., et al., Pharm Res. 2003 Feb;20(2):187-97 Feng B, Mills JB, Davidson RE,., et al., Drug Metab Dispos. 2008 Feb;36(2):268-75	1
117	Oxybutynin	0.8	-4.45593	Callegari E, Malhotra B, Bungay PJ., et al., Br J Clin Pharmacol. 2011 Aug;72(2):235-46	1
118	Gemifloxacin	0.35	-4.92082	Jin HE, Song B, Kim SB., et al., Xenobiotica. 2013 Apr;43(4):355-67	1
119	Indacaterol maleate	0.1 (VSS)	-4.70333	http://www.accessdata.fda.gov/drugsatfda_docs/nda/2011/022383Orig1s000ClinPharmR.pdf	2
120	Vildagliptin	>50	-5.82391	He H, Tran P, Yin H., et al., Drug Metab Dispos. 2009 Mar;37(3):545-54	3
121	Atomoxetine	27.8	-4.77728	Wager , TT., Chandrasekaran, RY., Xinjun Hou, X., et al., ACS Chem. Neurosci., 2010, 1 (6), pp 420–434	1
122	Fluvoxamine	14.869	-4.49894	Varma MV, Sateesh K, Panchagnula R., Mol Pharm. 2005 Jan-Feb;2(1):12-21	1
123	Pergolide_Mesilate	1 (SS)	-5.01323	Wager , TT., Chandrasekaran, RY., Xinjun Hou, X., et al., ACS Chem. Neurosci., 2010, 1 (6), pp 420–434	1
124	Procyclidine	0.001055	-4.15304	Varma MV, Sateesh K, Panchagnula R., Mol Pharm. 2005 Jan-Feb;2(1):12-21	2
125	Nortriptyline	0.025	-4.47237	Varma MV, Sateesh K, Panchagnula R., Mol Pharm. 2005 Jan-Feb;2(1):12-21	2
126	Methylphenobarbital	0.15	-4.38722	Behrens I, Stenberg P, Artursson P., et al., Pharm Res. 2001 Aug;18(8):1138-45.	2
127	Diphenoxylate	0.8	-6.69897	Crowe A, Wong P., Toxicol Appl Pharmacol. 2003 Nov 15;193(1):127-37	3

## Sheet: Supporting Information S2
Supporting Information S2 - Solubility dataset
#	Name	Solubility (mg/mL)	Comments e.g conditions -pH, salt (temp in oC)	Solubility Reference
1	Abacavir	1.68e-06	32	AQUASOL dATAbASE 6th edition
2	Acamprosate	100 (FS)	Calcium	Martindale, The complete drug reference, Ed 36th, Sweetman, SC., Pharmaceutical Press, London
3	Acarbose	1000 (VS)		Martindale, The complete drug reference, Ed 36th, Sweetman, SC., Pharmaceutical Press, London
4	Acebutolol	0.711	Intrinsic	Hopfinger AJ, Esposito EX, Llinàs A., et al., J Chem Inf Model. 2009 Jan;49(1):1-5
5	Acenocoumarol	0.00939	20-25	Hazardous Substances Data Bank (HSDB)
6	Acetaminophen	14.475	25	AQUASOL dATAbASE 6th edition
7	Acetanilide	5.84	25	AQUASOL dATAbASE 6th edition
8	Acetazolamide	0.7112	25	AQUASOL dATAbASE 6th edition
9	Acetohexamide	0.25	EFG, pH 6.5 (25)	AQUASOL dATAbASE 6th edition
10	Acitretin	0.01 (PI)		Martindale, The complete drug reference, Ed 36th, Sweetman, SC., Pharmaceutical Press, London
11	Acrivastine	0.7	pH 6.8, 25	Gu X, Li H, Macnair KR, et al., J Pharm Biomed Anal. 2005 Apr 1;37(4):663-7
12	Acyclovir	1.817	25	AQUASOL dATAbASE 6th edition
13	Albendazole	0.01		AQUASOL dATAbASE 6th edition
14	Alcuronium	100 (FS)	Chloride	Martindale, The complete drug reference, Ed 36th, Sweetman, SC., Pharmaceutical Press, London
15	Alfacalcidol	0.01 (PI)		Martindale, The complete drug reference, Ed 36th, Sweetman, SC., Pharmaceutical Press, London
16	Alfentanil	100 (FS)	Hydrochloride	Martindale, The complete drug reference, Ed 36th, Sweetman, SC., Pharmaceutical Press, London
17	Allopurinol	0.525	25	AQUASOL dATAbASE 6th edition
18	Almotriptan	100 (FS)	Malate	Suneetha, A.,Ravi teja, R., Kathirvel, S., IJMCA, 2012, 2(2),76-80
19	Alogliptin	10 (SPS)		http://www.accessdata.fda.gov/drugsatfda_docs/label/2013/022271s000lbl.pdf (accessed June 2013)
20	Alprazolam	0.07	Ambient temp	AQUASOL dATAbASE 6th edition
21	Alprenolol	0.3669	22.5	AQUASOL dATAbASE 6th edition
22	Altretamine	0.091		AQUASOL dATAbASE 6th edition
23	Amantadine	2.119	Intrinsic	Sköld C, Winiwarter S, Wernevik J., et al., J Med Chem. 2006 Nov 16;49(23):6660-71
24	Amifostine	100 (FS)		Martindale, The complete drug reference, Ed 36th, Sweetman, SC., Pharmaceutical Press, London
25	Amikacin	185	pH 10.4 (25)	AQUASOL dATAbASE 6th edition
26	Amiloride	659	25	AQUASOL dATAbASE 6th edition
27	Aminoglutethimide	0.01 (PI)		Martindale, The complete drug reference, Ed 36th, Sweetman, SC., Pharmaceutical Press, London
28	Aminopyrine	50.3	25	AQUASOL dATAbASE 6th edition
29	Amiodarone	0.7164	25	AQUASOL dATAbASE 6th edition
30	Amisulpride	0.01 (PI)		Martindale, The complete drug reference, Ed 36th, Sweetman, SC., Pharmaceutical Press, London
31	Amitriptyline	0.0097	24	SRC PHYSPROP
32	Amlodipine	<0.01	RT	AQUASOL dATAbASE 6th edition
33	Amobarbital	0.59	25	AQUASOL dATAbASE 6th edition
34	Amoxapine	0.0344	pH 7.4 (22.5-24.5), Hydrochloride salt	Pubchem (AID 1996): Burnham Center for Chemical Genomics (BCCG-A233-Analiza-Solubility-Assay)
35	Amoxicillin	4		AQUASOL dATAbASE 6th edition
36	Amphetamine	100 (FS)	Sulphate	Martindale, The complete drug reference, Ed 36th, Sweetman, SC., Pharmaceutical Press, London
37	Amphotericin_B	0.003	Intrinsic	AQUASOL dATAbASE 6th edition
38	Ampicillin	13.9	25	AQUASOL dATAbASE 6th edition
39	Amprenavir	0.04	25	Cao, D., Wang, J., Zhou, R. et al, J Chem Info Model, 2012, 52, 1132-1137
40	Amrinone	>0.0281	pH 7.4 (22.5-24.5)	Pubchem (AID 1996): Burnham Center for Chemical Genomics (BCCG-A233-Analiza-Solubility-Assay)
41	Amygdalin	77.8	10	AQUASOL dATAbASE 6th edition
42	Anagrelide	0.0012	pH 4-8 (25)	US Patent 2004/6,811,794, serial number US 10/027,349
43	Anastrozole	0.5		Cao, D., Wang, J., Zhou, R. et al, J Chem Info Model, 2012, 52, 1132-1137
44	Antipyrine	637	25	AQUASOL dATAbASE 6th edition
45	Arbekacin	1000 (VS)	Sulphate	Japanese Pharmacopoeia, 15th Ed, Pharmaceuticals and medical devices agency, Japan
46	Aripiprazole	<0.0003	pH 7.4 (22.5-24.5)	Pubchem (AID 1996): Burnham Center for Chemical Genomics (BCCG-A233-Analiza-Solubility-Assay)
47	Ascorbic_Acid	249	25	AQUASOL dATAbASE 6th edition
48	Aspirin	4.46	25 (different forms used)	AQUASOL dATAbASE 6th edition
49	Astemizole	0.321	pH 5.8 (30)	AQUASOL dATAbASE 6th edition
50	Atazanavir sulfate	4.5	24	http://www.accessdata.fda.gov/drugsatfda_docs/label/2012/021567s028lbl.pdf (Accessed June 2013)
51	Atenolol	26.5	37 (free base)	http://www.accessdata.fda.gov/drugsatfda_docs/label/2012/018240s032lbl.pdf (accessed June 2013)
52	Atomoxetine	27.8	Hydrochloride	Cao, D., Wang, J., Zhou, R. et al, J Chem Info Model, 2012, 52, 1132-1137
53	Atovaquone	<0.0001		Charman WN, Porter CJ, Mithani S., et al., J Pharm Sci. 1997 Mar;86(3):269-82
54	Atracurium	33 (S)	Besilate	Martindale, The complete drug reference, Ed 36th, Sweetman, SC., Pharmaceutical Press, London
55	Atropine	3.322	25	AQUASOL dATAbASE 6th edition
56	Auranofin	0.01 (PI)		Hazardous Substances Data Bank (HSDB)
57	Azatadine	100 (FS)	Malate	Martindale, The complete drug reference, Ed 36th, Sweetman, SC., Pharmaceutical Press, London
58	Azathioprine	0.13	25	AQUASOL dATAbASE 6th edition
59	Azelastine	10 (SPS)		Martindale, The complete drug reference, Ed 36th, Sweetman, SC., Pharmaceutical Press, London
60	Azimilide	290	pH 2.85 (Dihydrochloride)	Salata, JJ., Brooks, RR., Cardiovasc Drug Rev , 1997, 15(2), 137-156
61	Azithromycin	<0.003		Oh YK, Nix DE, Straubinger RM., Antimicrob Agents Chemother. 1995 Sep;39(9):2104-11
62	Azlocillin	50	Sodium	http://www.sigmaaldrich.com/etc/medialib/docs/Sigma/Product_Information_Sheet/a7926pis.Par.0001.File.tmp/a7926pis.pdf (Accessed June 2013)
63	Aztreonam	0.1 (VSS)		Martindale, The complete drug reference, Ed 36th, Sweetman, SC., Pharmaceutical Press, London
64	Baclofen	4.549	25	AQUASOL dATAbASE 6th edition
65	Bambuterol	100 (FS)	Hydrochloride	Martindale, The complete drug reference, Ed 36th, Sweetman, SC., Pharmaceutical Press, London
66	Benazepril	2.76	pH 7.4, Hydrochloride salt	Thomas S, Brightman F, Gill H., et al., J Pharm Sci. 2008 Oct;97(10):4557-74
67	Bendroflumethiazide	0.1083	25	AQUASOL dATAbASE 6th edition
68	Benorylate	0.02	21	AQUASOL dATAbASE 6th edition
69	Benserazide	100 (FS)	Hydrochloride	Martindale, The complete drug reference, Ed 36th, Sweetman, SC., Pharmaceutical Press, London
70	Benzbromarone	>0.042	pH 7.4 (22.5-24.5)	Pubchem (AID 1996): Burnham Center for Chemical Genomics (BCCG-A233-Analiza-Solubility-Assay)
71	Benzydamine	1000 (VS)	Hydrochloride	Martindale, The complete drug reference, Ed 36th, Sweetman, SC., Pharmaceutical Press, London
72	Bephenium	0.01 (PI)		Hazardous Substances Data Bank (HSDB)
73	Bepridil	7.43	37	AQUASOL dATAbASE 6th edition
74	Betahistine	1000 (VS)	Hydrochloride	Martindale, The complete drug reference, Ed 36th, Sweetman, SC., Pharmaceutical Press, London
75	Betaxolol	1000 (VS)	Hydrochloride	Martindale, The complete drug reference, Ed 36th, Sweetman, SC., Pharmaceutical Press, London
76	Bethanechol	100 (FS)	Chloride	Martindale, The complete drug reference, Ed 36th, Sweetman, SC., Pharmaceutical Press, London
77	Bezafibrate	>0.0543	pH 7.4 (22.5-24.5)	Pubchem (AID 1996): Burnham Center for Chemical Genomics (BCCG-A233-Analiza-Solubility-Assay)
78	Bicalutamide	<0.005		Cao, D., Wang, J., Zhou, R. et al, J Chem Info Model, 2012, 52, 1132-1137
79	Biotin	0.257	25	AQUASOL dATAbASE 6th edition
80	Biperiden	0.01 (PI)		Martindale, The complete drug reference, Ed 36th, Sweetman, SC., Pharmaceutical Press, London
81	Bisoprolol	5.5e-06	100	AQUASOL dATAbASE 6th edition
82	Boceprevir	~0.0015		http://www.accessdata.fda.gov/drugsatfda_docs/nda/2011/202258orig1s000clinpharmr.pdf
83	Bosentan	0.01		US Patent EP 2294056 A1 Serial number EP20090749657
84	Bretylium	>0.0622	pH 7.4 (22.5-24.5) tosylate salt	Pubchem (AID 1996): Burnham Center for Chemical Genomics (BCCG-A233-Analiza-Solubility-Assay)
85	Bromazepam	0.17		Benet LZ, Broccatelli F, Oprea TI., AAPS J. 2011 Dec;13(4):519-47
86	Bromfenac	33 (S)	Sodium	http://www.ema.europa.eu/docs/en_GB/document_library/EPAR_-_Public_assessment_report/human/001198/WC500107577.pdf (Accessed June 2013)
87	Bromhexine	0.1 (VSS)	Hydrochloride	Martindale, The complete drug reference, Ed 36th, Sweetman, SC., Pharmaceutical Press, London
88	Bromocriptine	0.00207		AQUASOL dATAbASE 6th edition
89	Brompheniramine_Maleate	33 (S)	Maleate	Martindale, The complete drug reference, Ed 36th, Sweetman, SC., Pharmaceutical Press, London
90	Budesonide	0.02153		AQUASOL dATAbASE 6th edition
91	Buflomedil	100 (FS)	Hydrochloride	Martindale, The complete drug reference, Ed 36th, Sweetman, SC., Pharmaceutical Press, London
92	Bumetanide	>0.0547	pH 7.4 (22.5-24.5)	Pubchem (AID 1996): Burnham Center for Chemical Genomics (BCCG-A233-Analiza-Solubility-Assay)
93	Bupivacaine	0.1015	25	AQUASOL dATAbASE 6th edition
94	Bupropion	78.7		Alelyunas YW, Empfield JR, McCarthy D., Bioorg Med Chem Lett. 2010 Dec 15;20(24):7312-6
95	Buspirone	100 (FS)	Hydrochloride	Martindale, The complete drug reference, Ed 36th, Sweetman, SC., Pharmaceutical Press, London
96	Busulfan	0.1		http://www.ema.europa.eu/docs/en_GB/document_library/EPAR__Scientific_Discussion/human/000472/WC500052062.pdf (Accessed June 2013)
97	Butylscopolamine	100 (FS)		Martindale, The complete drug reference, Ed 36th, Sweetman, SC., Pharmaceutical Press, London
98	Caffeine	21.6	25	AQUASOL dATAbASE 6th edition
99	Calcitriol	0.01 (PI)		Martindale, The complete drug reference, Ed 36th, Sweetman, SC., Pharmaceutical Press, London
100	Canagliflozin	0.01 (PI)		http://www.accessdata.fda.gov/drugsatfda_docs/label/2013/204042s000lbl.pdf (Accessed June 2013)
101	Capecitabine	26	20	Cao, D., Wang, J., Zhou, R. et al, J Chem Info Model, 2012, 52, 1132-1137
102	Capreomycin	100 (FS)	Sulphate	Martindale, The complete drug reference, Ed 36th, Sweetman, SC., Pharmaceutical Press, London
103	Capreomycin_2	100 (FS)	Sulphate	Martindale, The complete drug reference, Ed 36th, Sweetman, SC., Pharmaceutical Press, London
104	Captopril	119		AQUASOL dATAbASE 6th edition
105	Carbamazepine	0.15	25	AQUASOL dATAbASE 6th edition
106	Carbimazole	1 (SS)		Martindale, The complete drug reference, Ed 36th, Sweetman, SC., Pharmaceutical Press, London
107	Carboplatin	14.85		Harrap KR., Cancer Treat Rev. 1985 Sep;12 Suppl A:21-33
108	Carmustine	4	25	SRC PHYSPROP
109	Carprofen	0.00511	Intrinsic (25)	Llinàs A, Glen RC, Goodman JM., J Chem Inf Model. 2008 Jul;48(7):1289-303
110	Carteolol	33 (S)	Hydrochloride	Martindale, The complete drug reference, Ed 36th, Sweetman, SC., Pharmaceutical Press, London
111	Carvedilol	0.0004492	22.5	AQUASOL dATAbASE 6th edition
112	Cefaclor	10		AQUASOL dATAbASE 6th edition
113	Cefadroxil	1 (SS)		Martindale, The complete drug reference, Ed 36th, Sweetman, SC., Pharmaceutical Press, London
114	Cefamandole_Nafate	100 (FS)		Martindale, The complete drug reference, Ed 36th, Sweetman, SC., Pharmaceutical Press, London
115	Cefatrizine	16	For propylene glycolate, recalculated to main substance (25oC, H2O)	Kurochkina VB, Sklyarenko AV, Satarova JE., et al., Bioprocess Biosyst Eng. 2011 Nov;34(9):1103-17
116	Cefazolin	1 (SS)		Martindale, The complete drug reference, Ed 36th, Sweetman, SC., Pharmaceutical Press, London
117	Cefetamet_Pivoxil	0.16	pH 5-6	Koup JR, Dubach UC, Brandt R., et al., Antimicrob Agents Chemother. 1988 Apr;32(4):573-9
118	Cefixime	1 (SS)		Martindale, The complete drug reference, Ed 36th, Sweetman, SC., Pharmaceutical Press, London
119	Cefmetazole	1000 (VS)	Sodium	Martindale, The complete drug reference, Ed 36th, Sweetman, SC., Pharmaceutical Press, London
120	Cefodizime	164.41	Di sodium salt	Auda SH, Mrestani Y, Nies DH., et al., J Pharm Pharmacol. 2009 Jun;61(6):753-8.
121	Ceforanide	0.01 (PI)		Martindale, The complete drug reference, Ed 36th, Sweetman, SC., Pharmaceutical Press, London
122	Cefotaxime	100 (FS)	Sodium	Martindale, The complete drug reference, Ed 36th, Sweetman, SC., Pharmaceutical Press, London
123	Cefpodoxime_Proxetil	0.4		Khan F, Katara R, Ramteke S., AAPS PharmSciTech. 2010 Sep;11(3):1368-75
124	Ceftazidime	5		Chen XQ, Cho SJ, Li Y., et al., J Pharm Sci. 2002 Aug;91(8):1838-52
125	Ceftizoxime	100 (FS)	Sodium	Martindale, The complete drug reference, Ed 36th, Sweetman, SC., Pharmaceutical Press, London
126	Ceftriaxone	100 (FS)	Sodium	Martindale, The complete drug reference, Ed 36th, Sweetman, SC., Pharmaceutical Press, London
127	Cefuroxime_Axetil	1 (SS)		Martindale, The complete drug reference, Ed 36th, Sweetman, SC., Pharmaceutical Press, London
128	Celecoxib	0.007	25	AQUASOL dATAbASE 6th edition
129	Celiprolol	0.0229	20	AQUASOL dATAbASE 6th edition
130	Cephalexin	4.62	25	AQUASOL dATAbASE 6th edition
131	Cephalothin	0.457	Intrinsic (25)	Llinàs A, Glen RC, Goodman JM., J Chem Inf Model. 2008 Jul;48(7):1289-303
132	Cephradine	21.3		AQUASOL dATAbASE 6th edition
133	Cetirizine	100 (FS)	Hydrochloride	Martindale, The complete drug reference, Ed 36th, Sweetman, SC., Pharmaceutical Press, London
134	Chenodeoxycholic_Acid	0.0106	pH 3 (25)	AQUASOL dATAbASE 6th edition
135	Chloral_Hydrate	793	RT	AQUASOL dATAbASE 6th edition
136	Chlorambucil	>0.0456	pH 7.4 (22.5-24.5)	Pubchem (AID 1996): Burnham Center for Chemical Genomics (BCCG-A233-Analiza-Solubility-Assay)
137	Chloramphenicol	3.19	25	AQUASOL dATAbASE 6th edition
138	Chlordiazepoxide	2	RT	AQUASOL dATAbASE 6th edition
139	Chlorhexidine	0.042	22.5	AQUASOL dATAbASE 6th edition
140	Chlormezanone	2.5	25	SRC PHYSPROP
141	Chloroquine	50	Diphosphate salt	http://www.sigmaaldrich.com/etc/medialib/docs/Sigma/Product_Information_Sheet/c6628pis.Par.0001.File.tmp/c6628pis.pdf (Accessed June 2013)
142	Chlorothiazide	0.2827	25	AQUASOL dATAbASE 6th edition
143	Chlorphenesin	<10		SRC PHYSPROP
144	Chlorpheniramine	5.496	37.5	AQUASOL dATAbASE 6th edition
145	Chlorpromazine	0.00255	24	SRC PHYSPROP
146	Chlorpropamide	0.8913	25	AQUASOL dATAbASE 6th edition
147	Chlorthalidone	0.12	25	AQUASOL dATAbASE 6th edition
148	Chlorzoxazone	>0.0254	pH 7.4 (22.5-24.5)	Pubchem (AID 1996): Burnham Center for Chemical Genomics (BCCG-A233-Analiza-Solubility-Assay)
149	Cidofovir	>=170	pH 6-8	Hazardous Substances Data Bank (HSDB)
150	Cilazapril	5	Monhydrate (25)	http://www.rochecanada.com/gear/glossary/servlet/staticfilesServlet?type=data&communityId=re753001&id=static/attachedfile/re7300002/re77300002/AttachedFile_07590.pdf (Accessed June 2013)
151	Cilomilast	>1	>1mg/ml at pH 7	http://www.fda.gov/ohrms/dockets/ac/03/briefing/3976B1_02_G-FDA-Tab7-Part%201.pdf (Accessed June 2013)
152	Cilostazol	0.000101	37	Patel, SG., and Rajput., SJ., AAPS PharmSciTech. 2009 June; 10(2): 660–669
153	Cimetidine	9.3	Intrinsic (25)	AQUASOL dATAbASE 6th edition
154	Cinacalcet	<0.001	Neutal pH	Alvarez, F. J., G. G. Lawrence, et al. (2013). RAPID DISSOLUTION FORMULATION OF CINACALCET HCl, Google Patents. EP 1663182 B1
155	Cinchonine	0.2724	25	AQUASOL dATAbASE 6th edition
156	Cinoxacin	0.0367	pH 7.4 (22.5-24.5)	Pubchem (AID 1996): Burnham Center for Chemical Genomics (BCCG-A233-Analiza-Solubility-Assay)
157	Ciprofibrate	0.01 (PI)		Martindale, The complete drug reference, Ed 36th, Sweetman, SC., Pharmaceutical Press, London
158	Ciprofloxacin	0.086	25	AQUASOL dATAbASE 6th edition
159	Cisapride	0.009319	pH 8.2 (25)	AQUASOL dATAbASE 6th edition
160	Citalopram	100 (FS)	Hydrobromide	Martindale, The complete drug reference, Ed 36th, Sweetman, SC., Pharmaceutical Press, London
161	Clarithromycin	0.09948	EFG (20)	AQUASOL dATAbASE 6th edition
162	Clenbuterol	33 (S)	Hydrochloride	Martindale, The complete drug reference, Ed 36th, Sweetman, SC., Pharmaceutical Press, London
163	Clindamycin	1000 (VS)	Hydrochloride	Martindale, The complete drug reference, Ed 36th, Sweetman, SC., Pharmaceutical Press, London
164	Clobazam	1 (SS)		Martindale, The complete drug reference, Ed 36th, Sweetman, SC., Pharmaceutical Press, London
165	Clofibrate	0.09708	RT	AQUASOL dATAbASE 6th edition
166	Clomethiazole	1 (SS)		Martindale, The complete drug reference, Ed 36th, Sweetman, SC., Pharmaceutical Press, London
167	Clomifene	1 (SS)	Citrate	Martindale, The complete drug reference, Ed 36th, Sweetman, SC., Pharmaceutical Press, London
168	Clomipramine	100 (FS)	Hydrochloride	Martindale, The complete drug reference, Ed 36th, Sweetman, SC., Pharmaceutical Press, London
169	Clonazepam	0.1	25	SRC PHYSPROP
170	Clonidine	182.767	hydrochloride salt	Bergström CA, Wassvik CM, Norinder U., et al., J Chem Inf Comput Sci. 2004 Jul-Aug;44(4):1477-88
171	Clopidogrel bisulfate	0.01	At pH 6/8 (25)	http://www.accessdata.fda.gov/drugsatfda_docs/nda/2002/20-839S019_Clopidogrel%20Bisulfate_EAfonsi.pdf
172	Clorazepate	100 (FS)	Dipotassium	Martindale, The complete drug reference, Ed 36th, Sweetman, SC., Pharmaceutical Press, London
173	Clozapine	0.1889	Intrinsic	Hopfinger AJ, Esposito EX, Llinàs A., et al., J Chem Inf Model. 2009 Jan;49(1):1-5
174	Codeine	10.69	25	AQUASOL dATAbASE 6th edition
175	Conivaptan	<0.001		Crombie AL, Antrilli TM, Campbell BA., et al , Bioorg Med Chem Lett. 2010 Jun 15;20(12):3742-5
176	Corticosterone	0.2405	37	AQUASOL dATAbASE 6th edition
177	Coumarin	2.494	25	AQUASOL dATAbASE 6th edition
178	Creatinine	80.1	16	AQUASOL dATAbASE 6th edition
179	Crizotinib	<0.1		http://www.accessdata.fda.gov/drugsatfda_docs/label/2013/202570s004lbl.pdf (Accessed June 2013)
180	Cromolyn	>100	20	Hazardous Substances Data Bank (HSDB)
181	Cyclopenthiazide	0.05	RT	AQUASOL dATAbASE 6th edition
182	Cyclophosphamide	40		AQUASOL dATAbASE 6th edition
183	Cycloserine	100 (FS)		Martindale, The complete drug reference, Ed 36th, Sweetman, SC., Pharmaceutical Press, London
184	Cyclosporine_A	0.04	25	AQUASOL dATAbASE 6th edition
185	Cyproheptadine	0.0003176	22.5	AQUASOL dATAbASE 6th edition
186	Cyproterone_Acetate	0.01 (PI)		Martindale, The complete drug reference, Ed 36th, Sweetman, SC., Pharmaceutical Press, London
187	Cysteamine	33 (S)		Hazardous Substances Data Bank (HSDB)
188	Dalfampridine	83.3	20	SRC PHYSPROP
189	Dantrolene	0.1 (VSS)	Sodium	Martindale, The complete drug reference, Ed 36th, Sweetman, SC., Pharmaceutical Press, London
190	Dapsone	0.15	pH 7.4 (25)	AQUASOL dATAbASE 6th edition
191	Darifenacin hydrobromide	6.03	37	http://www.novartis.com.au/PI_PDF/ena.pdf (Accessed June 2013) http://www.ema.europa.eu/docs/en_GB/document_library/EPAR_-_Scientific_Discussion/human/000554/WC500026897.pdf (Accessed June 2013)
192	Deferasirox	~0.04	37	www.novartis.com.au/DownloadFile.aspx?t=p&f=exj.pdf&dateid (Accessed June 2013)
193	Deferoxamine	12	20	SRC PHYSPROP
194	Delavirdine	30	Intrinsic	AQUASOL dATAbASE 6th edition
195	Desipramine	0.0586	24	SRC PHYSPROP
196	Desmethyldiazepam	>0.0406	pH 7.4 (22.5-24.5)	Pubchem (AID 1996): Burnham Center for Chemical Genomics (BCCG-A233-Analiza-Solubility-Assay)
197	Desogestrel	0.01 (PI)		Martindale, The complete drug reference, Ed 36th, Sweetman, SC., Pharmaceutical Press, London
198	Desvenlafaxine_Succinate	13.6		http://www.ema.europa.eu/docs/en_GB/document_library/Application_withdrawal_assessment_report/2010/01/WC500066946.pdf (Accessed June 2013)
199	Dexamethasone	0.0985	25	AQUASOL dATAbASE 6th edition
200	Dexloxiglumide	0.533	pH 7.5	Tolle-Sander S, Grill A, Joshi H., et al., J Pharm Sci. 2003 Oct;92(10):1968-80
201	Dextromoramide	33 (S)	Tartrate	Martindale, The complete drug reference, Ed 36th, Sweetman, SC., Pharmaceutical Press, London
202	Dextrose	450.5	25	AQUASOL dATAbASE 6th edition
203	Diatrizoate	500	25	Hazardous Substances Data Bank (HSDB)
204	Diazepam	0.0468	25	AQUASOL dATAbASE 6th edition
205	Diazoxide	0.1	Intrinsic (25)	Llinàs A, Glen RC, Goodman JM., J Chem Inf Model. 2008 Jul;48(7):1289-303
206	Diclofenac	0.0035	32	AQUASOL dATAbASE 6th edition
207	Dicloxacillin	100 (FS)	Sodium	Martindale, The complete drug reference, Ed 36th, Sweetman, SC., Pharmaceutical Press, London
208	Dicyclomine	76.9		Hazardous Substances Data Bank (HSDB)
209	Didanosine	27.3	25	AQUASOL dATAbASE 6th edition
210	Diethylcarbamazine	1000 (VS)	Citrate	Martindale, The complete drug reference, Ed 36th, Sweetman, SC., Pharmaceutical Press, London
211	Diethylpropion	1000 (VS)	Hydrochloride	Martindale, The complete drug reference, Ed 36th, Sweetman, SC., Pharmaceutical Press, London
212	Diethylstilbestrol	0.012	25	AQUASOL dATAbASE 6th edition
213	Diflunisal	0.006186	pH 2 (24.9)	AQUASOL dATAbASE 6th edition
214	Digitoxin	0.0141	25	AQUASOL dATAbASE 6th edition
215	Digoxin	0.0464	25	AQUASOL dATAbASE 6th edition
216	Dihydrocodeine	100 (FS)	Tartrate	Martindale, The complete drug reference, Ed 36th, Sweetman, SC., Pharmaceutical Press, London
217	Dihydroergotamine	1 (SS)	Mesilate	Martindale, The complete drug reference, Ed 36th, Sweetman, SC., Pharmaceutical Press, London
218	Diloxanide	0.1 (VSS)	Furoate	Martindale, The complete drug reference, Ed 36th, Sweetman, SC., Pharmaceutical Press, London
219	Diltiazem	0.51	hydrochloride salt (25)	AQUASOL dATAbASE 6th edition
220	Diphenoxylate	0.8	25	SRC PHYSPROP
221	Diprophylline	333		SRC PHYSPROP
222	Dipyridamole	0.00346	Intrinsic	Hopfinger AJ, Esposito EX, Llinàs A., et al., J Chem Inf Model. 2009 Jan;49(1):1-5
223	Disopyramide	0.00617	22.5	AQUASOL dATAbASE 6th edition
224	Disulfiram	0.2	25	AQUASOL dATAbASE 6th edition
225	Dofetilide	0.1 (VSS)		Hazardous Substances Data Bank (HSDB)
226	Dolasetron	100 (FS)	Mesilate	Martindale, The complete drug reference, Ed 36th, Sweetman, SC., Pharmaceutical Press, London
227	Domperidone	0.0171	pH 6.5 (22)	AQUASOL dATAbASE 6th edition
228	Dothiepin	100 (FS)	Hydrochloride	Martindale, The complete drug reference, Ed 36th, Sweetman, SC., Pharmaceutical Press, London
229	Doxapram	10 (SPS)	Hydrochloride	Martindale, The complete drug reference, Ed 36th, Sweetman, SC., Pharmaceutical Press, London
230	Doxazosin	1 (SS)	Mesilate	Martindale, The complete drug reference, Ed 36th, Sweetman, SC., Pharmaceutical Press, London
231	Doxepin	0.03157	25	AQUASOL dATAbASE 6th edition
232	Doxifluridine	2.57	37	Zhang LJ,Pan YF.,Zhang, DT., et al., Central South Pharmacy, 2009 12 (016)
233	Doxorubicin	33 (S)	Hydrochloride	Martindale, The complete drug reference, Ed 36th, Sweetman, SC., Pharmaceutical Press, London
234	Doxycycline	1087	25	AQUASOL dATAbASE 6th edition
235	Drotaverine	13.75	Hydrochloride (37)	AQUASOL dATAbASE 6th edition
236	Edetic_Acid/EDTA	1		SRC PHYSPROP
237	Eltrombopag_Olamine	0.01 (PI)		http://www.accessdata.fda.gov/drugsatfda_docs/label/2012/022291s008lbl.pdf (Accessed June 2013)
238	Emtricitabine	112		Benet LZ, Broccatelli F, Oprea TI., AAPS J. 2011 Dec;13(4):519-47
239	Enalapril	21	Maleate (25)	AQUASOL dATAbASE 6th edition
240	Enalaprilat	1 (SS)		Martindale, The complete drug reference, Ed 36th, Sweetman, SC., Pharmaceutical Press, London
241	Enoxacin	0.383	Intrinsic (25)	Ross, DL., Riley, CM., Int J Pharm, 1990, 63, 30 Sept, 237–250
242	Enoximone	0.014		Dage RC, Kariya T, Hsieh CP., et al., Am J Cardiol. 1987 Aug 14;60(5):10C-14C
243	Entacapone	0.0124	pH 3	Savolainen,J., Forsberg, M., Taipale, H., et al., Drug Develop Res, 2000, 49 (4), 238–244
244	Entecavir	2.4	25	Cao, D., Wang, J., Zhou, R. et al, J Chem Info Model, 2012, 52, 1132-1137
245	Enzalutamide	0.002		http://www.accessdata.fda.gov/drugsatfda_docs/nda/2012/203415Orig1s000ClinPharmR.pdf (Accessed June 2013)
246	Ephedrine	52.3	25	AQUASOL dATAbASE 6th edition
247	Eprosartan	0.01 (PI)		Hazardous Substances Data Bank (HSDB)
248	Ergotamine	0.1 (VSS)	Tartrate	Martindale, The complete drug reference, Ed 36th, Sweetman, SC., Pharmaceutical Press, London
249	Erlotinib	0.4	Hydrochloride, pH 2	Benet LZ, Broccatelli F, Oprea TI., AAPS J. 2011 Dec;13(4):519-47
250	Ertapenem	33 (S)	Sodium	http://www.accessdata.fda.gov/drugsatfda_docs/label/2013/021337s041lbl.pdf (Accessed June 2013)
251	Erythromycin	0.528	dihydrate (30)	AQUASOL dATAbASE 6th edition
252	Estramustine	~0.001	30	AQUASOL dATAbASE 6th edition
253	Ethacrynic_Acid	0.1 (VSS)		Martindale, The complete drug reference, Ed 36th, Sweetman, SC., Pharmaceutical Press, London
254	Ethambutol	649	Dihydrochloride	Becker C, Dressman JB, Amidon GL., et al ., J Pharm Sci. 2008 Apr;97(4):1350-60
255	Ethanol	1000		SRC PHYSPROP
256	Ethinyl_Estradiol	0.0113		SRC PHYSPROP
257	Ethionamide	0.01 (PI)		Hazardous Substances Data Bank (HSDB)
258	Ethosuximide	190	pH 3-7.9 (25)	AQUASOL dATAbASE 6th edition
259	Ethylmorphine	2.794	20	AQUASOL dATAbASE 6th edition
260	Ethynodiol_Diacetate	0.0014	25	AQUASOL dATAbASE 6th edition
261	Etidronate	690	20	SRC PHYSPROP
262	Etilefrine	0.0189	pH 7.4 (22.5-24.5)	Pubchem (AID 1996): Burnham Center for Chemical Genomics (BCCG-A233-Analiza-Solubility-Assay)
263	Etodolac	0.04	37	AQUASOL dATAbASE 6th edition
264	Etofylline	32.26		AQUASOL dATAbASE 6th edition
265	Etoposide	0.1145	25	AQUASOL dATAbASE 6th edition
266	Etoricoxib	0.0767	RT	Nayak, AM., and Panigrahi, PP., ISRN Physical Chemistry, Volume 2012 (2012), 1-5
267	Etravirine	0.01 (PI)		http://www.janssen.com.au/files/Products/Intelence_PI.pdf (Accessed June 2013)
268	Ezetimibe	0.01 (PI)		http://www.accessdata.fda.gov/drugsatfda_docs/label/2012/021445s033lbl.pdf (Accessed June 2013)
269	Ezogabine	~16	Gastric pH	http://www.accessdata.fda.gov/drugsatfda_docs/label/2013/022345s007lbl.pdf (Accessed June 2013)
270	Famciclovir	20		Harnden MR, Jarvest RL, Boyd MR., et al., J Med Chem. 1989 Aug;32(8):1738-43
271	Famotidine	0.0011	25	AQUASOL dATAbASE 6th edition
272	Febuxostat	0.0129		Khosravan,R., Grabowski, B., Wu, JT., et al., Br J Clin Pharmacol. 2008 March; 65(3): 355–363
273	Felbamate	10 (SPS)		Martindale, The complete drug reference, Ed 36th, Sweetman, SC., Pharmaceutical Press, London
274	Felodipine	0.00453	22	AQUASOL dATAbASE 6th edition
275	Fenclofenac	0.00842	25	AQUASOL dATAbASE 6th edition
276	Fenfluramine	10 (SPS)	Hydrochloride	Hazardous Substances Data Bank (HSDB)
277	Fenofibrate	0.0008	25	AQUASOL dATAbASE 6th edition
278	Fenoprofen	0.1	37	AQUASOL dATAbASE 6th edition
279	Fenoterol	61.45		Elshafeeya, AE., Hamzab, YE., Aminb, SY., et al., J Adv Res. 2012, Apr; 3(2): 125–132
280	Fidaxomicin	0.015	Neutral pH	http://www.fda.gov/downloads/AdvisoryCommittees/CommitteesMeetingMaterials/Drugs/Anti-InfectiveDrugsAdvisoryCommittee/UCM249354.pdf (Accessed June 2013)
281	Finasteride	0.04	Ambient temp	AQUASOL dATAbASE 6th edition
282	Flecainide	33 (S)	Acetate	Martindale, The complete drug reference, Ed 36th, Sweetman, SC., Pharmaceutical Press, London
283	Fleroxacin	0.691	Intrinsic (25)	Ross, DL., Riley, CM., Int J Pharm, 1990, 63, 30 Sept, 237–250
284	Fluconazole	1		AQUASOL dATAbASE 6th edition
285	Flucytosine	15	25	SRC PHYSPROP
286	Fludrocortisone_Acetate	0.01 (PI)		Martindale, The complete drug reference, Ed 36th, Sweetman, SC., Pharmaceutical Press, London
287	Flumazenil	0.1 (VSS)		Martindale, The complete drug reference, Ed 36th, Sweetman, SC., Pharmaceutical Press, London
288	Flunarizine	0.0165		Marına,TM., Margarita, VM., Salcedo, GE., Il Farmaco 57 (2002) 723 /727
289	Flunisolide	0.01 (PI)		Martindale, The complete drug reference, Ed 36th, Sweetman, SC., Pharmaceutical Press, London
290	Flunitrazepam	0.006	pH 7.4 (37)	Boxenbaum HG, Posmanter HN, Macasieb T., et al., J Pharmacokinet Biopharm. 1978 Aug;6(4):283-93
291	Fluocortolone	0.295	37	SRC PHYSPROP
292	Fluorescein	0.05	20	Hazardous Substances Data Bank (HSDB)
293	Fluoxetine	14	Hydrochloride salt	http://www.accessdata.fda.gov/drugsatfda_docs/label/2003/018936s064lbl.pdf (Accessed June 2013)
294	Fluoxymesterone	0.01 (PI)		Martindale, The complete drug reference, Ed 36th, Sweetman, SC., Pharmaceutical Press, London
295	Flupenthixol	1000 (VS)		Martindale, The complete drug reference, Ed 36th, Sweetman, SC., Pharmaceutical Press, London
296	Flupirtine	1		AQUASOL dATAbASE 6th edition
297	Flurazepam	500	Dihydrochloride salt	Hazardous Substances Data Bank (HSDB)
298	Flurbiprofen	0.0325	25	AQUASOL dATAbASE 6th edition
299	Flutamide	0.01 (PI)		Martindale, The complete drug reference, Ed 36th, Sweetman, SC., Pharmaceutical Press, London
300	Fluvastatin	33 (S)	Sodium	Martindale, The complete drug reference, Ed 36th, Sweetman, SC., Pharmaceutical Press, London
301	Fluvoxamine	14.869	22	Henry TB, Kwon JW, Armbrust KL., et al., Environ Toxicol Chem. 2004 Sep;23(9):2229-33.
302	Folic_Acid	0.0016	25	AQUASOL dATAbASE 6th edition
303	Folinic_Acid	10 (SPS)		Martindale, The complete drug reference, Ed 36th, Sweetman, SC., Pharmaceutical Press, London
304	Formoterol_Fumarate	1 (SS)		Martindale, The complete drug reference, Ed 36th, Sweetman, SC., Pharmaceutical Press, London
305	Foscarnet	33 (S)	Sodium	Martindale, The complete drug reference, Ed 36th, Sweetman, SC., Pharmaceutical Press, London
306	Frovatriptan	33 (S)	Succinate	Hazardous Substances Data Bank (HSDB)
307	Fructose	778	25	AQUASOL dATAbASE 6th edition
308	Furosemide	0.0062	25	AQUASOL dATAbASE 6th edition
309	Fusidic_Acid	100 (FS)	Sodium	Martindale, The complete drug reference, Ed 36th, Sweetman, SC., Pharmaceutical Press, London
310	Gabapentin	100 (FS)		Martindale, The complete drug reference, Ed 36th, Sweetman, SC., Pharmaceutical Press, London
311	Galantamine	31	Hydrobromide	http://www.janssen.com.au/files/Products/Reminyl_PI.pdf (Accessed June 2013)
312	Ganciclovir	3.37	25	AQUASOL dATAbASE 6th edition
313	Gemcitabine	33 (S)	Hydrochloride	Martindale, The complete drug reference, Ed 36th, Sweetman, SC., Pharmaceutical Press, London
314	Gemfibrozil	>0.5		AQUASOL dATAbASE 6th edition
315	Gemifloxacin	0.35	pH 7 (37)	http://www.accessdata.fda.gov/drugsatfda_docs/label/2007/021158s007lbl.pdf (Accessed June 2013)
316	Gentamicin_C1A	4	25	SRC PHYSPROP
317	Gitoxin	0.002343		AQUASOL dATAbASE 6th edition
318	Gliclazide	0.025	pH 4.37	Grbic S, Parojcic J, Ibric S, et al., AAPS PharmSciTech. 2011 Mar;12(1):165-71
319	Glimepiride	>0.0736	pH 7.4 (22.5-24.5)	Pubchem (AID 1996): Burnham Center for Chemical Genomics (BCCG-A233-Analiza-Solubility-Assay)
320	Glipizide	0.00145	Intrinsic (25)	Llinàs A, Glen RC, Goodman JM., J Chem Inf Model. 2008 Jul;48(7):1289-303
321	Gliquidone	0.0695	pH 7.4 (22.5-24.5)	Pubchem (AID 1996): Burnham Center for Chemical Genomics (BCCG-A233-Analiza-Solubility-Assay)
322	Glyburide	0.031	25	AQUASOL dATAbASE 6th edition
323	Glycine	218	25	AQUASOL dATAbASE 6th edition
324	Glycopyrrolate	100 (FS)	Bromide	Martindale, The complete drug reference, Ed 36th, Sweetman, SC., Pharmaceutical Press, London
325	Granisetron	100 (FS)	Hydrochloride	Martindale, The complete drug reference, Ed 36th, Sweetman, SC., Pharmaceutical Press, London
326	Guanabenz	11	Acetate (25)	Hazardous Substances Data Bank (HSDB)
327	Guanadrel	76	Sulphate (25)	Hazardous Substances Data Bank (HSDB)
328	Haloperidol	0.002058	22.5	AQUASOL dATAbASE 6th edition
329	Hexobarbital	0.4347	25	AQUASOL dATAbASE 6th edition
330	Hydralazine	0.0048	22.5	AQUASOL dATAbASE 6th edition
331	Hydrochlorothiazide	0.605	25	AQUASOL dATAbASE 6th edition
332	Hydrocodone	33 (S)	Tartrate	Martindale, The complete drug reference, Ed 36th, Sweetman, SC., Pharmaceutical Press, London
333	Hydrocortisone	0.33	25	AQUASOL dATAbASE 6th edition
334	Hydroflumethiazide	0.3299	RT	AQUASOL dATAbASE 6th edition
335	Hydromorphone hydrochloride	1.931		Hazardous Substances Data Bank (HSDB)
336	Hydroxychloroquine	100 (FS)	Sulphate	Martindale, The complete drug reference, Ed 36th, Sweetman, SC., Pharmaceutical Press, London
337	Hydroxyprogesterone_Caproate	0.01 (PI)		Martindale, The complete drug reference, Ed 36th, Sweetman, SC., Pharmaceutical Press, London
338	Hydroxyurea	1000	25	SRC PHYSPROP
339	Hydroxyzine	100 (FS)	Hydrochloride	Martindale, The complete drug reference, Ed 36th, Sweetman, SC., Pharmaceutical Press, London
340	Ibuprofen	0.0138	25	AQUASOL dATAbASE 6th edition
341	Ifosfamide	33 (S)		Martindale, The complete drug reference, Ed 36th, Sweetman, SC., Pharmaceutical Press, London
342	Imatinib	0.049	Mesylate pH 7.4	Hazardous Substances Data Bank (HSDB)
343	Imipenem	10		SRC PHYSPROP
344	Imipramine	0.01823	24	AQUASOL dATAbASE 6th edition
345	Indacaterol maleate	0.1 (VSS)	Maleate	Martindale, The complete drug reference, Ed 36th, Sweetman, SC., Pharmaceutical Press, London
346	Indapamide	0.01 (PI)		Martindale, The complete drug reference, Ed 36th, Sweetman, SC., Pharmaceutical Press, London
347	Indomethacin	0.002		Cordero JA, Alarcon L, Escribano E, et al., J Pharm Sci. 1997 Apr;86(4):503-8.
348	Iohexol	1000 (VS)		Martindale, The complete drug reference, Ed 36th, Sweetman, SC., Pharmaceutical Press, London
349	Iothalamatesodium	6000	20	Hazardous Substances Data Bank (HSDB)
350	Ipratropium	33 (S)	Bromide	Martindale, The complete drug reference, Ed 36th, Sweetman, SC., Pharmaceutical Press, London
351	Irbesartan	0.01 (PI)		Martindale, The complete drug reference, Ed 36th, Sweetman, SC., Pharmaceutical Press, London
352	Isocarboxazid	0.8	25	AQUASOL dATAbASE 6th edition
353	Isoniazid	122.8	25	AQUASOL dATAbASE 6th edition
354	Isosorbide_Dinitrate	0.5497	25	AQUASOL dATAbASE 6th edition
355	Isotretinoin	0.01 (PI)		Martindale, The complete drug reference, Ed 36th, Sweetman, SC., Pharmaceutical Press, London
356	Isoxicam	0.0339	pH 7.4 (22.5-24.5)	Pubchem (AID 1996): Burnham Center for Chemical Genomics (BCCG-A233-Analiza-Solubility-Assay)
357	Isradipine	0.01 (PI)		Martindale, The complete drug reference, Ed 36th, Sweetman, SC., Pharmaceutical Press, London
358	Itraconazole	0.004	pH 1	Ghazal, H. S.; Dyas, A. M.; Ford, J. L.; Hutcheon, G. A., Int. J. Pharm. 2009, 366, 117–123.
359	Ivermectin	0.004		AQUASOL dATAbASE 6th edition
360	Kanamycin	100 (FS)	Sulphate	Martindale, The complete drug reference, Ed 36th, Sweetman, SC., Pharmaceutical Press, London
361	Ketanserin	0.01	25	SRC PHYSPROP
362	Ketoconazole	0.01	Ambient temp	AQUASOL dATAbASE 6th edition
363	Ketoprofen	0.051	25	AQUASOL dATAbASE 6th edition
364	Ketorolac	0.183	32	AQUASOL dATAbASE 6th edition
365	Ketotifen	10 (SPS)	Hydrogen fumarate	Martindale, The complete drug reference, Ed 36th, Sweetman, SC., Pharmaceutical Press, London
366	Labetalol	0.117	25	SRC PHYSPROP
367	Lacidipine	0.01 (PI)		Martindale, The complete drug reference, Ed 36th, Sweetman, SC., Pharmaceutical Press, London
368	Lacosamide	~30	25	http://www.accessdata.fda.gov/drugsatfda_docs/nda/2008/022253s000_022254s000_ChemR.pdf (Accessed June 2013)
369	Lactulose	764	30	SRC PHYSPROP
370	Lamivudine	70	RT	AQUASOL dATAbASE 6th edition
371	Lamotrigine	0.17	25	http://www.accessdata.fda.gov/drugsatfda_docs/label/2012/020241s050,020764s043,022251s013lbl.pdf (Accessed June 2013)
372	Lansoprazole	0.01 (PI)		Martindale, The complete drug reference, Ed 36th, Sweetman, SC., Pharmaceutical Press, London
373	Leflunomide	0.01 (PI)		Hazardous Substances Data Bank (HSDB)
374	Lenalidomide	0.45		http://www.accessdata.fda.gov/drugsatfda_docs/label/2009/021880s006s016s017lbl.pdf (Accessed June 2013)
375	Lercanidipine	0.005		US Patent 2006/0073200 A1, Serial number EP1807059 A1
376	Letrozole	0.01 (PI)		Martindale, The complete drug reference, Ed 36th, Sweetman, SC., Pharmaceutical Press, London
377	Levamisole	1 (SS)		Martindale, The complete drug reference, Ed 36th, Sweetman, SC., Pharmaceutical Press, London
378	Levetiracetam	1040		http://www.ucb.com/_up/ucb_com_products/documents/Keppra%20tabs%20and%20oral%20sol%20April%202009.pdf (Accessed June 2013)
379	Levobunolol	100 (FS)	Hydrochloride	Martindale, The complete drug reference, Ed 36th, Sweetman, SC., Pharmaceutical Press, London
380	Levocetirizine dihydrochloride	94.6		http://www.fda.gov/downloads/Drugs/DevelopmentApprovalProcess/DevelopmentResources/ucm072485.pdf (Accessed June 2013)
381	Levodopa	3.79	25	AQUASOL dATAbASE 6th edition
382	Levofloxacin	25		Koeppe MO, Cristofoletti R, Fernandes EF., et al., J Pharm Sci. 2011 May;100(5):1628-36
383	Levomepromazine	0.02	25	AQUASOL dATAbASE 6th edition
384	Levosimendan	0.04		http://www.orionpharma.es/OrionPharmaES_Global/Archivos/MOGRAFIA_SIMDAX.pdf (Accessed June 2013)
385	Levothyroxine_Sodium	0.0428		Sköld C, Winiwarter S, Wernevik J., et al., J Med Chem. 2006 Nov 16;49(23):6660-71
386	Lidocaine	3.85	25	AQUASOL dATAbASE 6th edition
387	Lincomycin	1000 (VS)	Hydrochloride	Martindale, The complete drug reference, Ed 36th, Sweetman, SC., Pharmaceutical Press, London
388	Linezolid	1 (SS)		http://www.pfizer.ca/en/our_products/products/monograph/143 (Accessed June 2013)
389	Liothyronine	0.003958	37	AQUASOL dATAbASE 6th edition
390	Lisinopril	97		The Merck Index: 12th edition 1996
391	Lodoxamide_Trometamol	33 (S)		http://www.accessdata.fda.gov/drugsatfda_docs/label/2003/20191slr018_alomide_lbl.pdf (Accessed June 2013)
392	Lomefloxacin	1.03	Intrinsic (25)	Ross, DL., Riley, CM., Int J Pharm, 1990, 63, 30 Sept, 237–250
393	Lomustine	<0.05		Hazardous Substances Data Bank (HSDB)
394	Loperamide_Hydrochloride	1 (SS)	Hydrochloride	Martindale, The complete drug reference, Ed 36th, Sweetman, SC., Pharmaceutical Press, London
395	Lopinavir	0.007		DeGoey DA, Grampovnik DJ, Flosi WJ., et al., J Med Chem. 2009 May 14;52(9):2964-70
396	Loratadine	0.01		Janssens F, Leenaerts J, Diels G., et al., J Med Chem. 2005 Mar 24;48(6):2154-66
397	Lorazepam	0.054		AQUASOL dATAbASE 6th edition
398	Lorcaserin_Hydrochloride	>400		http://www.accessdata.fda.gov/drugsatfda_docs/label/2012/022529lbl.pdf (Accessed June 2013)
399	Lormetazepam	0.01 (PI)		Martindale, The complete drug reference, Ed 36th, Sweetman, SC., Pharmaceutical Press, London
400	Lornoxicam	0.0155	pH 7.4 (22.5-24.5)	Pubchem (AID 1996): Burnham Center for Chemical Genomics (BCCG-A233-Analiza-Solubility-Assay)
401	Losartan	100 (FS)	Potassium	Martindale, The complete drug reference, Ed 36th, Sweetman, SC., Pharmaceutical Press, London
402	Lovastatin	0.0004		Hazardous Substances Data Bank (HSDB)
403	Lymecycline	1000 (VS)		Martindale, The complete drug reference, Ed 36th, Sweetman, SC., Pharmaceutical Press, London
404	Lynestrenol	0.01 (PI)		Martindale, The complete drug reference, Ed 36th, Sweetman, SC., Pharmaceutical Press, London
405	Mannitol	209.2		AQUASOL dATAbASE 6th edition
406	Maprotiline	0.0008334	22.5	AQUASOL dATAbASE 6th edition
407	Maraviroc	1000 (VS)		Hazardous Substances Data Bank (HSDB)
408	Mazindol	0.01 (PI)		Martindale, The complete drug reference, Ed 36th, Sweetman, SC., Pharmaceutical Press, London
409	Mebendazole	0.0388	25 (different polymorphs)	AQUASOL dATAbASE 6th edition
410	Mebeverine	1000 (VS)	Hydrochloride	Martindale, The complete drug reference, Ed 36th, Sweetman, SC., Pharmaceutical Press, London
411	Meclofenamic_Acid	0.03		SRC PHYSPROP
412	Mefenamic_Acid	0.02	30	SRC PHYSPROP
413	Mefloquine	1.806		Strauch S, Jantratid E, Dressman JB., et al., J Pharm Sci. 2011 Jan;100(1):11-21
414	Megestrol_Acetate	0.002		Kawabata,Y., Wada, K., Nakatani, M., et al ., Int J Pharm, 2011, Nov; 420 (1), Pages 1–10
415	Meloxicam	0.012	25	AQUASOL dATAbASE 6th edition
416	Memantine	38.6	pH 6.99	http://www.accessdata.fda.gov/drugsatfda_docs/nda/2005/021627s000_namenda_clinpharmr.pdf (Accessed June 2013)
417	Meperidine	6.55	25	AQUASOL dATAbASE 6th edition
418	Mercaptopurine	0.124	25	AQUASOL dATAbASE 6th edition
419	Meropenem	10 (SPS)		Martindale, The complete drug reference, Ed 36th, Sweetman, SC., Pharmaceutical Press, London
420	Mesalamine	1.41	37	French, DL., Mauger, JW., Pharm Res, 1993 Sept; 10(9), 1285-1290
421	Mesna	100 (FS)		Martindale, The complete drug reference, Ed 36th, Sweetman, SC., Pharmaceutical Press, London
422	Mestranol	0.013		Yin GG, Kookana RS, Ru YJ., Environ Int. 2002 Dec;28(6):545-51
423	Metaproterenol	100 (FS)	Sulphate	Martindale, The complete drug reference, Ed 36th, Sweetman, SC., Pharmaceutical Press, London
424	Metformin	100 (FS)	Hydrochloride	Martindale, The complete drug reference, Ed 36th, Sweetman, SC., Pharmaceutical Press, London
425	Methadone	33 (S)	Hydrochloride	Martindale, The complete drug reference, Ed 36th, Sweetman, SC., Pharmaceutical Press, London
426	Methimazole	~200		Hazardous Substances Data Bank (HSDB)
427	Methocarbamol	7.2	25	SRC PHYSPROP
428	Methotrexate	0.01 (PI)		Martindale, The complete drug reference, Ed 36th, Sweetman, SC., Pharmaceutical Press, London
429	Methsuximide	2.8	25	AQUASOL dATAbASE 6th edition
430	Methyldopa	10	25	AQUASOL dATAbASE 6th edition
431	Methylergonovine	33 (S)	Maleate	Martindale, The complete drug reference, Ed 36th, Sweetman, SC., Pharmaceutical Press, London
432	Methylphenidate	100 (FS)	Hydrochloride	Martindale, The complete drug reference, Ed 36th, Sweetman, SC., Pharmaceutical Press, London
433	Methylphenobarbital	0.15	25	AQUASOL dATAbASE 6th edition
434	Methylprednisolone	0.539	25	AQUASOL dATAbASE 6th edition
435	Methysergide	1 (SS)	Maleate	Martindale, The complete drug reference, Ed 36th, Sweetman, SC., Pharmaceutical Press, London
436	Metoclopramide	0.2	25	SRC PHYSPROP
437	Metolazone	0.0603	25	AQUASOL dATAbASE 6th edition
438	Metoprolol	43	Tartrate (25)	AQUASOL dATAbASE 6th edition
439	Metronidazole	10.3	25	AQUASOL dATAbASE 6th edition
440	Metyrapone	10 (SPS)		Martindale, The complete drug reference, Ed 36th, Sweetman, SC., Pharmaceutical Press, London
441	Mexiletine	100 (FS)	Hydrochloride	Martindale, The complete drug reference, Ed 36th, Sweetman, SC., Pharmaceutical Press, London
442	Mezlocillin	100 (FS)	Sodium	Martindale, The complete drug reference, Ed 36th, Sweetman, SC., Pharmaceutical Press, London
443	Mianserin	10 (SPS)	Hydrochloride	Martindale, The complete drug reference, Ed 36th, Sweetman, SC., Pharmaceutical Press, London
444	Miconazole	0.09	Ambient temp	AQUASOL dATAbASE 6th edition
445	Midazolam	0.054	24	AQUASOL dATAbASE 6th edition
446	Mifepristone	0.0004748	22.5	AQUASOL dATAbASE 6th edition
447	Miglitol	33 (S)		Hazardous Substances Data Bank (HSDB)
448	Miglustat	>1000		http://www.ema.europa.eu/docs/en_GB/document_library/EPAR_-_Scientific_Discussion/human/000435/WC500046721.pdf (Accessed June 2013)
449	Milnacipran	100 (FS)	Hydrochloride	http://www.accessdata.fda.gov/drugsatfda_docs/label/2013/022256s016lbl.pdf (Accessed June 2013)
450	Milrinone	0.01 (PI)		Martindale, The complete drug reference, Ed 36th, Sweetman, SC., Pharmaceutical Press, London
451	Minocycline	52	25	AQUASOL dATAbASE 6th edition
452	Minoxidil	2.2		SRC PHYSPROP
453	Mirtazapine	0.01 (PI)		Martindale, The complete drug reference, Ed 36th, Sweetman, SC., Pharmaceutical Press, London
454	Misoprostol	0.01 (PI)		Martindale, The complete drug reference, Ed 36th, Sweetman, SC., Pharmaceutical Press, London
455	Mitotane	0.0001	25	SRC PHYSPROP
456	Mitoxantrone	10 (SPS)	Hydrochloride	Martindale, The complete drug reference, Ed 36th, Sweetman, SC., Pharmaceutical Press, London
457	Modafinil	0.01 (PI)		Martindale, The complete drug reference, Ed 36th, Sweetman, SC., Pharmaceutical Press, London
458	Molsidomine	10 (SPS)		Martindale, The complete drug reference, Ed 36th, Sweetman, SC., Pharmaceutical Press, London
459	Montelukast	100 (FS)	Sodium	Martindale, The complete drug reference, Ed 36th, Sweetman, SC., Pharmaceutical Press, London
460	Moricizine	0.02	25	Alelyunas YW, Liu R, Pelosi-Kilby L, et al., Eur J Pharm Sci. 2009 May 12;37(2):172-82
461	Morphine	0.345	25	AQUASOL dATAbASE 6th edition
462	Moxifloxacin	10 (SPS)	Hydrochloride	Martindale, The complete drug reference, Ed 36th, Sweetman, SC., Pharmaceutical Press, London
463	Moxisylyte	100 (FS)	Hydrochloride	Martindale, The complete drug reference, Ed 36th, Sweetman, SC., Pharmaceutical Press, London
464	Moxonidine	0.8003		AQUASOL dATAbASE 6th edition
465	Mycophenolate_Mofetil	0.043	pH 7.4	Hazardous Substances Data Bank (HSDB)
466	Mycophenolic_Acid	0.013	25	AQUASOL dATAbASE 6th edition
467	Nabumetone	0.006	22.5	AQUASOL dATAbASE 6th edition
468	Nadolol	8.3	25	AQUASOL dATAbASE 6th edition
469	Nafronyl	100 (FS)	Oxalate	Martindale, The complete drug reference, Ed 36th, Sweetman, SC., Pharmaceutical Press, London
470	Nalbuphine	35.5	25, Hydrochloride	http://www.accessdata.fda.gov/drugsatfda_docs/label/2005/018024s040lbl.pdf (Accessed June 2013)
471	Nalidixic_Acid	0.1	23	AQUASOL dATAbASE 6th edition
472	Naloxone	0.414	Intrinsic (25)	Llinàs A, Glen RC, Goodman JM., J Chem Inf Model. 2008 Jul;48(7):1289-303
473	Naltrexone	100 (FS)	Hydrochloride	Martindale, The complete drug reference, Ed 36th, Sweetman, SC., Pharmaceutical Press, London
474	Naproxen	0.0159	25	AQUASOL dATAbASE 6th edition
475	Naratriptan	35	Hydrochloride	http://www.gsk.com.au/resources.ashx/prescriptionmedicinesproductschilddataproinfo/1592/FileName/6202B57DE3B8BD676581EE8A076127FE/PI_Naramig.pdf (Accessed June 2013)
476	Nateglinide	0.01 (PI)		http://www.accessdata.fda.gov/drugsatfda_docs/label/2009/077463s000lbl.pdf (Accessed June 2013)
477	Nefazodone	0.0326	pH 7.4 (22.5-24.5)	Pubchem (AID 1996): Burnham Center for Chemical Genomics (BCCG-A233-Analiza-Solubility-Assay)
478	Nelfinavir	4.5		AQUASOL dATAbASE 6th edition
479	Neomycin	1000 (VS)	Sulphate	Martindale, The complete drug reference, Ed 36th, Sweetman, SC., Pharmaceutical Press, London
480	Neostigmine	1000		AQUASOL dATAbASE 6th edition
481	Netilmicin	1000 (VS)	Sulphate	Martindale, The complete drug reference, Ed 36th, Sweetman, SC., Pharmaceutical Press, London
482	Nevirapine	0.1708	pH 7	AQUASOL dATAbASE 6th edition
483	Niacin	17.1	20	AQUASOL dATAbASE 6th edition
484	Nicardipine	1 (SS)	Hydrochloride	http://www.accessdata.fda.gov/drugsatfda_docs/anda/98/74928ap_appltr_prntlbl_chemr.pdf (Accessed June 2013)
485	Nicotine	1000		SRC PHYSPROP
486	Nifedipine	0.0058	25	AQUASOL dATAbASE 6th edition
487	Nilutamide	0.1 (VSS)		Martindale, The complete drug reference, Ed 36th, Sweetman, SC., Pharmaceutical Press, London
488	Nimodipine	0.00305461		Yu, J., He, H., Tang, X., J. Pharm. Pharmacol, 2006 58 (11), 1429–1435
489	Nitisinone	0.01 (PI)		http://www.accessdata.fda.gov/drugsatfda_docs/label/2013/021232s010lbl.pdf (Accessed June 2013)
490	Nitrazepam	0.043	30	AQUASOL dATAbASE 6th edition
491	Nitrendipine	0.01 (PI)		Martindale, The complete drug reference, Ed 36th, Sweetman, SC., Pharmaceutical Press, London
492	Nitrofurantoin	0.124	25	AQUASOL dATAbASE 6th edition
493	Nizatidine	21.4	25	AQUASOL dATAbASE 6th edition
494	Norethindrone	0.00633	25	AQUASOL dATAbASE 6th edition
495	Norfloxacin	0.19	25	AQUASOL dATAbASE 6th edition
496	Norgestimate	0.01 (PI)		Martindale, The complete drug reference, Ed 36th, Sweetman, SC., Pharmaceutical Press, London
497	Norgestrel	0.01		AQUASOL dATAbASE 6th edition
498	Nortriptyline	0.025	Intrinsic (25)	Llinàs A, Glen RC, Goodman JM., J Chem Inf Model. 2008 Jul;48(7):1289-303
499	Ofloxacin	2.75	Intrinsic (25)	Ross, DL., Riley, CM., Int J Pharm, 1990, 63, 30 Sept, 237–250
500	Olanzapine	0.01 (PI)		http://www.accessdata.fda.gov/drugsatfda_docs/label/2013/020592s063,021086s041lbl.pdf (Accessed June 2013)
501	Olopatadine_Hydrochloride	33 (S)	Hydrochloride	http://www.accessdata.fda.gov/drugsatfda_docs/label/2010/021545s013lbl.pdf (Accessed June 2013)
502	Olsalazine	1.149e-05	25	AQUASOL dATAbASE 6th edition
503	Omeprazole	0.1		Pilbrant, A., Cederberg, C., Scand J Gastroentero, 1985, 20, 113-120
504	Ondansetron	0.035208	pH 7.4	Alelyunas YW, Liu R, Pelosi-Kilby L, et al., Eur J Pharm Sci. 2009 May 12;37(2):172-82
505	Orlistat	0.01 (PI)		http://www.accessdata.fda.gov/drugsatfda_docs/label/2012/020766s029lbl.pdf (Accessed June 2013)
506	Orphenadrine	0.001801	22.5	AQUASOL dATAbASE 6th edition
507	Oseltamivir	>500	Phosphate	http://www.roche-australia.com/fmfiles/re7229005/downloads/anti-virals/tamiflu-pi.pdf (Accessed June 2013)
508	Ouabain	13		AQUASOL dATAbASE 6th edition
509	Oxamniquine	0.1 (VSS)		Hazardous Substances Data Bank (HSDB)
510	Oxandrolone	0.1 (VSS)		Martindale, The complete drug reference, Ed 36th, Sweetman, SC., Pharmaceutical Press, London
511	Oxaprozin	0.004	37	AQUASOL dATAbASE 6th edition
512	Oxazepam	0.035	22	AQUASOL dATAbASE 6th edition
513	Oxcarbazepine	0.084		Douroumis D, Fahr A. Eur J Pharm Biopharm. 2006 Jun;63(2):173-5
514	Oxitropium	1000 (VS)		Martindale, The complete drug reference, Ed 36th, Sweetman, SC., Pharmaceutical Press, London
515	Oxprenolol	1000 (VS)	Hydrochloride	Martindale, The complete drug reference, Ed 36th, Sweetman, SC., Pharmaceutical Press, London
516	Oxtriphylline	1000 (VS)		Martindale, The complete drug reference, Ed 36th, Sweetman, SC., Pharmaceutical Press, London
517	Oxybutynin	0.8	pH 6	Miyamoto, E; Kawashima, S; Yoshifumi, M., et al, The Analyst, 1994, 119, (7), 1489
518	Oxycodone	142.9	Hydrochloride	AQUASOL dATAbASE 6th edition
519	Oxyphenbutazone	0.02	Intrinsic (RT)	AQUASOL dATAbASE 6th edition
520	Oxytetracycline	7.548	21	AQUASOL dATAbASE 6th edition
521	Palonosetron	100 (FS)	Hydrochloride	Martindale, The complete drug reference, Ed 36th, Sweetman, SC., Pharmaceutical Press, London
522	Pamidronic_Acid	33 (S)	Sodium	Martindale, The complete drug reference, Ed 36th, Sweetman, SC., Pharmaceutical Press, London
523	Pancuronium	500	25	The Merck Index: 12th edition 1996
524	Pantoprazole	100 (FS)	Sodium	Martindale, The complete drug reference, Ed 36th, Sweetman, SC., Pharmaceutical Press, London
525	Papaverine	0.03733	37.5	AQUASOL dATAbASE 6th edition
526	Paricalcitol	0.01 (PI)		Martindale, The complete drug reference, Ed 36th, Sweetman, SC., Pharmaceutical Press, London
527	Paromomycin	1000 (VS)	Sulphate	Martindale, The complete drug reference, Ed 36th, Sweetman, SC., Pharmaceutical Press, London
528	Paroxetine	6.213		Kwon JW, Armbrust KL., Bull Environ Contam Toxicol. 2008 Aug;81(2):128-35
529	Pefloxacin	0.197	pH 7.2	McGuirk PR, Jefson MR, Mann DD., et al., J Med Chem. 1992 Feb 21;35(4):611-20
530	Penbutolol	7	RT	AQUASOL dATAbASE 6th edition
531	Penciclovir	3		Harnden MR, Jarvest RL, Boyd MR., et al., J Med Chem. 1989 Aug;32(8):1738-43
532	Penicillin G	2.675	25	AQUASOL dATAbASE 6th edition
533	Penicillin_V	0.24	pH1.8	Hazardous Substances Data Bank (HSDB)
534	Pentamidine	100 (FS)	Isetionate	Martindale, The complete drug reference, Ed 36th, Sweetman, SC., Pharmaceutical Press, London
535	Pentazocine	0.01 (PI)		Martindale, The complete drug reference, Ed 36th, Sweetman, SC., Pharmaceutical Press, London
536	Pentobarbital	0.77	25	AQUASOL dATAbASE 6th edition
537	Pentoxifylline	77	25	SRC PHYSPROP
538	Pergolide_Mesilate	1 (SS)	Mesilate	Martindale, The complete drug reference, Ed 36th, Sweetman, SC., Pharmaceutical Press, London
539	Perindopril_Erbumine	100 (FS)	Erbumine	Martindale, The complete drug reference, Ed 36th, Sweetman, SC., Pharmaceutical Press, London
540	Perphenazine	0.02828	24	AQUASOL dATAbASE 6th edition
541	Phenacemide	0.182		AQUASOL dATAbASE 6th edition
542	Phenazopyridine	0.0137	25	Llinàs A, Glen RC, Goodman JM., J Chem Inf Model. 2008 Jul;48(7):1289-303.
543	Phenindione	0.1 (VSS)		Martindale, The complete drug reference, Ed 36th, Sweetman, SC., Pharmaceutical Press, London
544	Pheniramine	11.05	Maleate (37.5)	AQUASOL dATAbASE 6th edition
545	Phenobarbital	1.13	25	AQUASOL dATAbASE 6th edition
546	Phenprocoumon	0.01 (PI)		Hazardous Substances Data Bank (HSDB)
547	Phensuximide	4.2	25	AQUASOL dATAbASE 6th edition
548	Phenylalanine	27	25	AQUASOL dATAbASE 6th edition
549	Phenylbutazone	0.034	25	AQUASOL dATAbASE 6th edition
550	Phenylpropanolamine	100 (FS)	Hydrochloride	Martindale, The complete drug reference, Ed 36th, Sweetman, SC., Pharmaceutical Press, London
551	Phenytoin	0.014	pH 1-7 (25)	AQUASOL dATAbASE 6th edition
552	Phthalylsulfathiazole	0.59	37	SRC PHYSPROP
553	Physostigmine	5	pH 7.4	Chaw CS, Tan CW, Yang YY., et al., Biomaterials. 2003 Mar;24(7):1271-7
554	Pimozide	0.0029	30	AQUASOL dATAbASE 6th edition
555	Pindolol	0.033	22.5	AQUASOL dATAbASE 6th edition
556	Pioglitazone	0.01 (PI)		http://www.accessdata.fda.gov/drugsatfda_docs/label/2011/021073s043s044lbl.pdf (Accessed June 2013)
557	Pipemidic_Acid	0.3215	0.05N NaCl (25)	AQUASOL dATAbASE 6th edition
558	Piperacillin	100 (FS)	Hydrochloride	http://www.accessdata.fda.gov/drugsatfda_docs/label/2008/050545s053lbl.pdf (Accessed June 2013)
559	Pirenzepine_Hydrochloride	100 (FS)	Hydrochloride	Martindale, The complete drug reference, Ed 36th, Sweetman, SC., Pharmaceutical Press, London
560	Piretanide	0.1 (VSS)		Martindale, The complete drug reference, Ed 36th, Sweetman, SC., Pharmaceutical Press, London
561	Piroxicam	0.084	25	AQUASOL dATAbASE 6th edition
562	Pizotyline	0.1 (VSS)	Maleate	Martindale, The complete drug reference, Ed 36th, Sweetman, SC., Pharmaceutical Press, London
563	Poldine	100 (FS)	Metilsulfate	Martindale, The complete drug reference, Ed 36th, Sweetman, SC., Pharmaceutical Press, London
564	Polythiazide	0.01 (PI)		Martindale, The complete drug reference, Ed 36th, Sweetman, SC., Pharmaceutical Press, London
565	Pomalidomide	0.01		http://www.accessdata.fda.gov/drugsatfda_docs/label/2013/204026lbl.pdf (Accessed June 2013)
566	Posaconazole	<0.002		US Patent 2008/0171,013 A1 Serial number 12/014,391
567	Pralidoxime	100 (FS)	Chloride	Martindale, The complete drug reference, Ed 36th, Sweetman, SC., Pharmaceutical Press, London
568	Pramipexole	>10	pH 7.4	US Patent 2010/0086, 589, Serial number 12/630,271
569	Pravastatin	100 (FS)	Sodium	Martindale, The complete drug reference, Ed 36th, Sweetman, SC., Pharmaceutical Press, London
570	Praziquantel	0.4		AQUASOL dATAbASE 6th edition
571	Prazosin	0.0032	22.5	AQUASOL dATAbASE 6th edition
572	Prednisolone	0.212	25	AQUASOL dATAbASE 6th edition
573	Prednisone	0.115	25	AQUASOL dATAbASE 6th edition
574	Pregabalin	32.1		US Patent 2005/0171,203 Serial number A1 11/016,511
575	Primidone	0.47	25	AQUASOL dATAbASE 6th edition
576	Probenecid	0.0036	22.5	AQUASOL dATAbASE 6th edition
577	Probucol	5e-06		US Patent 2005/0171,203 Serial number A1 11/016,511
578	Procainamide	1000 (VS)	Hydrochloride	Martindale, The complete drug reference, Ed 36th, Sweetman, SC., Pharmaceutical Press, London
579	Procarbazine	33 (S)	Hydrochloride	Hazardous Substances Data Bank (HSDB)
580	Procyclidine	0.001055	22.5	AQUASOL dATAbASE 6th edition
581	Progesterone	0.0089	25	AQUASOL dATAbASE 6th edition
582	Promethazine	0.01564	24	AQUASOL dATAbASE 6th edition
583	Propafenone	0.0007599	22.5	AQUASOL dATAbASE 6th edition
584	Propantheline	1000 (VS)	Bromide	Martindale, The complete drug reference, Ed 36th, Sweetman, SC., Pharmaceutical Press, London
585	Propofol	0.16	Ambient temp	AQUASOL dATAbASE 6th edition
586	Propoxyphene	0.0037	Hydrochloride, intrinsic (25)	AQUASOL dATAbASE 6th edition
587	Propranolol	360	37	Takka S, Rajbhandari S, Sakr A., Eur J Pharm Biopharm. 2001 Jul;52(1):75-82
588	Propylthiouracil	1.204	Intrinsic (25)	AQUASOL dATAbASE 6th edition
589	Protriptyline	500		Hazardous Substances Data Bank (HSDB)
590	Proxyphylline	1000	25	SRC PHYSPROP
591	Pseudoephedrine	<0.5	RT	AQUASOL dATAbASE 6th edition
592	Pyrazinamide	17.4	EFG (25)	AQUASOL dATAbASE 6th edition
593	Pyridostigmine	1000 (VS)	Bromide	Martindale, The complete drug reference, Ed 36th, Sweetman, SC., Pharmaceutical Press, London
594	Pyrimethamine	0.01		AQUASOL dATAbASE 6th edition
595	Quetiapine	0.4		http://www.accessdata.fda.gov/drugsatfda_docs/nda/2007/022047Orig1s000ChemR.pdf
596	Quinalbarbitone	0.1 (VSS)		Martindale, The complete drug reference, Ed 36th, Sweetman, SC., Pharmaceutical Press, London
597	Quinapril	100 (FS)	Hydrochloride	Martindale, The complete drug reference, Ed 36th, Sweetman, SC., Pharmaceutical Press, London
598	Quinidine	11.1	25	Merck, 2001. Merck Index 13th edition.
599	Quinine	0.5497	Hydrochloride (25)	AQUASOL dATAbASE 6th edition
600	Rabeprazole	0.395	pH 7.5	Mallikarjuna Gouda M, Somashekar S, Putta RK., et al, J. Chem. Pharm. Res., 2010, 2(3):187-192
601	Raffinose	229.8	25	AQUASOL dATAbASE 6th edition
602	Raloxifene	0.00025		Hazardous Substances Data Bank (HSDB)
603	Ramelteon	0.21		http://www.ema.europa.eu/docs/en_GB/document_library/Application_withdrawal_assessment_report/2010/01/WC500064663.pdf
604	Ramipril	10 (SPS)		Martindale, The complete drug reference, Ed 36th, Sweetman, SC., Pharmaceutical Press, London
605	Ranitidine	550	pH 1–7.4, Hydrochloride	Kortejarvi, H., Yliperttula,M., Dressman, JB., et al., J Pharm Sci, 2005, Aug 94 (8):1617-1625
606	Reboxetine	250	Mesylate	US Patent 2009/0143,387 A1 Serial number 12/339,212
607	Repaglinide	0.08999	25	AQUASOL dATAbASE 6th edition
608	Ribavirin	142	25	Hazardous Substances Data Bank (HSDB)
609	Riboflavin	0.08468	25	AQUASOL dATAbASE 6th edition
610	Rifabutin	0.19		AQUASOL dATAbASE 6th edition
611	Rifampin	2.792	pH 7.5 (RT)	AQUASOL dATAbASE 6th edition
612	Rilpivirine	0.01 (PI)	Hydrochloride	http://www.accessdata.fda.gov/drugsatfda_docs/label/2013/202022s005lbl.pdf (Accessed June 2013)
613	Riluzole	0.1 (VSS)		http://www.accessdata.fda.gov/drugsatfda_docs/label/2009/020599s013lbl.pdf (Accessed June 2013)
614	Risperidone	0.04474	25	AQUASOL dATAbASE 6th edition
615	Ritodrine	100 (FS)	Hydrochloride	Martindale, The complete drug reference, Ed 36th, Sweetman, SC., Pharmaceutical Press, London
616	Ritonavir	0.01		AQUASOL dATAbASE 6th edition
617	Rivaroxaban	0.01 (PI)		http://www.accessdata.fda.gov/drugsatfda_docs/label/2013/022406s004lbl.pdf (Accessed June 2013)
618	Rivastigmine	1000 (VS)	Tartrate	http://www.accessdata.fda.gov/drugsatfda_docs/label/2006/020823s016,021025s008lbl.pdf (Accessed June 2013)
619	Rizatriptan	42	25	http://www.accessdata.fda.gov/drugsatfda_docs/label/2011/020864s011s016s017s018s019,020865s012s016s018s020s021lbl.pdf (Accessed June 2013)
620	Rofecoxib	0.009	25	AQUASOL dATAbASE 6th edition
621	Ropinirole	133	Hydrochloride	http://www.accessdata.fda.gov/drugsatfda_docs/label/2008/020658s018s020s021lbl.pdf (Accessed June 2013)
622	Rosuvastatin	33 (S)	Calcium	Hazardous Substances Data Bank (HSDB)
623	Rufinamide	0.031		http://www.accessdata.fda.gov/drugsatfda_docs/nda/2008/021911s000_EA.pdf (Accessed June 2013)
624	Ruxolitinib	2.7		http://www.accessdata.fda.gov/drugsatfda_docs/label/2012/202192s001lbl.pdf (Accessed June 2013)
625	Saccharin	4.3	25	AQUASOL dATAbASE 6th edition
626	Salbutamol	17.95	EFG (25)	AQUASOL dATAbASE 6th edition
627	Salicylic_Acid	2.18	25	AQUASOL dATAbASE 6th edition
628	Saquinavir	0.055	Mesylate (25)	AQUASOL dATAbASE 6th edition
629	Saxagliptin	10 (SPS)	Hydrochloride	http://www.accessdata.fda.gov/drugsatfda_docs/label/2013/022350s011lbl.pdf (Accessed June 2013)
630	Scopolamine	100		AQUASOL dATAbASE 6th edition
631	Selegiline	100 (FS)	Hydrochloride	Martindale, The complete drug reference, Ed 36th, Sweetman, SC., Pharmaceutical Press, London
632	Sertraline hydrochloride	4.24		Deák K, Takács-Novák K, Tihanyi K, et al., Med Chem. 2006 Jul;2(4):385-9
633	Sibutramine	2.9	Hydrochloride monohydrate	Li DX, Jang KY, Kang W., et al, Biol Pharm Bull. 2010;33(2):279-84
634	Sildenafil	3.488	Citrate	AQUASOL dATAbASE 6th edition
635	Sirolimus	0.0026	25	Pubchem (AID 1996): Burnham Center for Chemical Genomics (BCCG-A233-Analiza-Solubility-Assay)
636	Sitagliptin	33 (S)	Phosphate monohydrate	http://www.accessdata.fda.gov/drugsatfda_docs/label/2013/021995s027lbl.pdf (Accessed June 2013)
637	Solifenacin	100 (FS)	Succinate	http://www.accessdata.fda.gov/drugsatfda_docs/label/2013/021518s015lbl.pdf (Accessed June 2013)
638	Sotalol	100 (FS)	Hydrochloride	Martindale, The complete drug reference, Ed 36th, Sweetman, SC., Pharmaceutical Press, London
639	Sparfloxacin	280	Intrinsic (25)	Llinàs A, Glen RC, Goodman JM., J Chem Inf Model. 2008 Jul;48(7):1289-303
640	Spirapril	0.1 (VSS)	Hydrochloride	Martindale, The complete drug reference, Ed 36th, Sweetman, SC., Pharmaceutical Press, London
641	Spironolactone	0.0213	25	AQUASOL dATAbASE 6th edition
642	Stavudine	85	24.8	AQUASOL dATAbASE 6th edition
643	Streptomycin	100 (FS)	Sulphate	Martindale, The complete drug reference, Ed 36th, Sweetman, SC., Pharmaceutical Press, London
644	Streptozocin	5.066	25	AQUASOL dATAbASE 6th edition
645	Succinylsulfathiazole	0.49	38	AQUASOL dATAbASE 6th edition
646	Sufentanil	0.076	25	AQUASOL dATAbASE 6th edition
647	Sulbactam	100 (FS)	Sodium	Martindale, The complete drug reference, Ed 36th, Sweetman, SC., Pharmaceutical Press, London
648	Sulfadiazine	0.0721	25	AQUASOL dATAbASE 6th edition
649	Sulfamerazine	0.2118	25	AQUASOL dATAbASE 6th edition
650	Sulfamethazine	0.4453	25	AQUASOL dATAbASE 6th edition
651	Sulfamethizole	0.529	20	AQUASOL dATAbASE 6th edition
652	Sulfamethoxazole	0.4383	25	AQUASOL dATAbASE 6th edition
653	Sulfapyridine	0.265	25	AQUASOL dATAbASE 6th edition
654	Sulfasalazine	0.01		AQUASOL dATAbASE 6th edition
655	Sulfinpyrazone	2.601	22	AQUASOL dATAbASE 6th edition
656	Sulfisomidine	1.382	25	AQUASOL dATAbASE 6th edition
657	Sulfisoxazole	0.292	37	AQUASOL dATAbASE 6th edition
658	Sulindac	0.007	37	AQUASOL dATAbASE 6th edition
659	Sulpiride	0.01 (PI)		Martindale, The complete drug reference, Ed 36th, Sweetman, SC., Pharmaceutical Press, London
660	Sumatriptan	101	Succinate (20)	Balaguer-Fernández C, Femenía-Font A, Del Rio-Sancho S., et al., J Pharm Sci. 2008 Jun;97(6):2102-9
661	Suprofen	10 (SPS)		Martindale, The complete drug reference, Ed 36th, Sweetman, SC., Pharmaceutical Press, London
662	Tacrine	0.92	Hydrochloride	Lee J, Park TG, Choi H., Int J Pharm. 2000 Feb 25;196(1):75-83.
663	Tacrolimus	0.00122	25	AQUASOL dATAbASE 6th edition
664	Talinolol	0.02		Ghai D, Sinha VR., Nanomedicine. 2012 Jul;8(5):618-26
665	Tamoxifen	0.1		Gao S, Singh J., J. Control Release, 1998, 51 (2–3), 193–199
666	Tamsulosin	1 (SS)	Hydrochloride	Martindale, The complete drug reference, Ed 36th, Sweetman, SC., Pharmaceutical Press, London
667	Tegaserod	0.0176		Srivijaya,R., Vishweshwar, P., Sreekanth, BR., et al., 2008, CrystEngComm, 3, (online)
668	Telmisartan	0.01 (PI)		Martindale, The complete drug reference, Ed 36th, Sweetman, SC., Pharmaceutical Press, London
669	Temazepam	0.0929252	Intrinsic, pH 6.5	Du-Cunya,L., Huwylerb, J., Wiese, M., et al., European J Med Chem, 2008 Mar, 43(3), 501–512
670	Temozolomide	1 (SS)		http://www.schering-plough.ca/assets/en/pdf/products/TEMODAL-PM_E.pdf (Accessed June 2013)
671	Tenoxicam	0.0619	32	AQUASOL dATAbASE 6th edition
672	Terazosin	0.0306	22.5	AQUASOL dATAbASE 6th edition
673	Terbinafine	0.00532	Hydrochloride (27)	Kumar, N., Jain, AK., Singh, C., et al., Asian journal of pharmaceutics, 2008, 2 (3 ), 154-158
674	Terbutaline	90		Reverchon E, Della Porta G., Int J Pharm. 2003 Jun 4;258(1-2):1-9
675	Terfenadine	9.7e-08	25	AQUASOL dATAbASE 6th edition
676	Testosterone	0.0279	25	AQUASOL dATAbASE 6th edition
677	Tetrabenazine	10 (SPS)		http://www.accessdata.fda.gov/drugsatfda_docs/label/2011/021894s004lbl.pdf (Accessed June 2013)
678	Tetracycline	0.44	25	AQUASOL dATAbASE 6th edition
679	Theophylline	7.55	25	AQUASOL dATAbASE 6th edition
680	Thiabendazole	0.05	Intrinsic (25)	AQUASOL dATAbASE 6th edition
681	Thioridazine	0.001113	22.5	AQUASOL dATAbASE 6th edition
682	Tiagabine	10 (SPS)	Hydrochloride	Martindale, The complete drug reference, Ed 36th, Sweetman, SC., Pharmaceutical Press, London
683	Tibolone	0.01 (PI)		Martindale, The complete drug reference, Ed 36th, Sweetman, SC., Pharmaceutical Press, London
684	Ticagrelor	0.01	RT	http://www1.astrazeneca-us.com/pi/brilinta.pdf (Accessed June 2013)
685	Ticarcillin	100 (FS)	Sodium	Martindale, The complete drug reference, Ed 36th, Sweetman, SC., Pharmaceutical Press, London
686	Ticlopidine	0.001	pH 7.4 (22.5-24.5)	Pubchem (AID 1996): Burnham Center for Chemical Genomics (BCCG-A233-Analiza-Solubility-Assay)
687	Tilidine	100 (FS)	Hydrochloride	Martindale, The complete drug reference, Ed 36th, Sweetman, SC., Pharmaceutical Press, London
688	Timolol	33 (S)	Maleate	Martindale, The complete drug reference, Ed 36th, Sweetman, SC., Pharmaceutical Press, London
689	Tinidazole	0.01 (PI)		Martindale, The complete drug reference, Ed 36th, Sweetman, SC., Pharmaceutical Press, London
690	Tizanidine	18.25	pH 7.2	Alelyunas YW, Liu R, Pelosi-Kilby L, et al., Eur J Pharm Sci. 2009 May 12;37(2):172-82
691	Tobramycin	100 (FS)		Martindale, The complete drug reference, Ed 36th, Sweetman, SC., Pharmaceutical Press, London
692	Tocainide	100 (FS)	Hydrochloride	Martindale, The complete drug reference, Ed 36th, Sweetman, SC., Pharmaceutical Press, London
693	Tolazoline	1000 (VS)	Hydrochloride	Martindale, The complete drug reference, Ed 36th, Sweetman, SC., Pharmaceutical Press, London
694	Tolbutamide	0.125	24	AQUASOL dATAbASE 6th edition
695	Tolmetin	0.02	37	AQUASOL dATAbASE 6th edition
696	Tolterodine	12	Tartrate	http://www.accessdata.fda.gov/drugsatfda_docs/label/2012/020771s028lbl.pdf (Accessed June 2013)
697	Topiramate	9.705		AQUASOL dATAbASE 6th edition
698	Toremifene	0.63	Citrate, (37)	http://www.accessdata.fda.gov/drugsatfda_docs/label/2011/020497s006lbl.pdf (Accessed June 2013)
699	Torsemide	0.01 (PI)		Martindale, The complete drug reference, Ed 36th, Sweetman, SC., Pharmaceutical Press, London
700	Tramadol	100 (FS)	Hydrochloride	Martindale, The complete drug reference, Ed 36th, Sweetman, SC., Pharmaceutical Press, London
701	Trandolapril	0.01 (PI)		Martindale, The complete drug reference, Ed 36th, Sweetman, SC., Pharmaceutical Press, London
702	Tranexamic_Acid	167		SRC PHYSPROP
703	Trapidil	100 (FS)		Martindale, The complete drug reference, Ed 36th, Sweetman, SC., Pharmaceutical Press, London
704	Trazodone	0.127	Intrinsic	Hopfinger AJ, Esposito EX, Llinàs A., et al., J Chem Inf Model. 2009 Jan;49(1):1-5
705	Triamcinolone	0.07999	25	AQUASOL dATAbASE 6th edition
706	Triamcinolone_Acetonide	0.041	25	AQUASOL dATAbASE 6th edition
707	Triazolam	0.03	Ambient temp	AQUASOL dATAbASE 6th edition
708	Trifluoperazine	0.01223	24	AQUASOL dATAbASE 6th edition
709	Trihexyphenidyl	0.0006709	22.5	AQUASOL dATAbASE 6th edition
710	Trimeprazine	100 (FS)	Tartrate	Martindale, The complete drug reference, Ed 36th, Sweetman, SC., Pharmaceutical Press, London
711	Trimethobenzamide	100 (FS)	Hydrochloride	Martindale, The complete drug reference, Ed 36th, Sweetman, SC., Pharmaceutical Press, London
712	Trimethoprim	0.403	25	AQUASOL dATAbASE 6th edition
713	Trimipramine	0.0048	Intrinsic (25)	Llinàs A, Glen RC, Goodman JM., J Chem Inf Model. 2008 Jul;48(7):1289-303
714	Trospium	500	Chloride	http://www.accessdata.fda.gov/drugsatfda_docs/label/2011/021595s007lbl.pdf (Accessed June 2013)
715	Trovafloxacin	0.0123	25	SRC PHYSPROP
716	Tubocurarine	50	Chloride (22)	Dutcher, JD., . Am. Chem. Soc., 1946, 68 (3), pp 419–424
717	UK-294,315	0.74		Harrison A, Betts A, Fenner K, et al, Drug Metab Dispos, 2004, 32,197-204.
718	Ursodeoxycholic_Acid	0.003533	pH 3 (25)	AQUASOL dATAbASE 6th edition
719	Valaciclovir	174	Hydrochloride	http://www.fda.gov/downloads/Drugs/DevelopmentApprovalProcess/DevelopmentResources/ucm072850.pdf (Accessed June 2013)
720	Valdecoxib	0.01	25	http://www.accessdata.fda.gov/drugsatfda_docs/label/2004/21341lbl.pdf (Accessed June 2013)
721	Valproic_Acid	1.65		AQUASOL dATAbASE 6th edition
722	Valsartan	0.08499	25	AQUASOL dATAbASE 6th edition
723	Vancomycin	100 (FS)	Hydrochloride	Martindale, The complete drug reference, Ed 36th, Sweetman, SC., Pharmaceutical Press, London
724	Vardenafil	0.11		http://www.accessdata.fda.gov/drugsatfda_docs/label/2011/021400s013lbl.pdf (Accessed June 2013)
725	Varenicline tartrate	1000 (VS)	Tartrate	http://www.accessdata.fda.gov/drugsatfda_docs/label/2013/021928s030lbl.pdf (Accessed June 2013)
726	Vecuronium	16	pH 3, Bromide (25)	http://www.aspenpharma.com.au/product_info/pi/PI_Vecure.pdf (Accessed June 2013)
727	Venlafaxine	<0.1	RT	AQUASOL dATAbASE 6th edition
728	Verapamil	0.7205		Bergström CA, Luthman K, Artursson P., Eur J Pharm Sci. 2004 Aug;22(5):387-98
729	Vidarabine	0.5135		AQUASOL dATAbASE 6th edition
730	Vigabatrin	1000 (VS)		Martindale, The complete drug reference, Ed 36th, Sweetman, SC., Pharmaceutical Press, London
731	Vilazodone	0.32	Hydrochloride	http://www.accessdata.fda.gov/drugsatfda_docs/nda/2011/022567Orig1s000ClinPharmR.pdf (Accessed June 2013)
732	Vildagliptin	>50	Unpublished results from the reference	He H, Tran P, Yin H., et al., Drug Metab Dispos. 2009 Mar;37(3):545-54
733	Vinblastine	100 (FS)	Sulphate	Martindale, The complete drug reference, Ed 36th, Sweetman, SC., Pharmaceutical Press, London
734	Vismodegib	0.0095	pH 6.5	Robarge KD, Brunton SA, Castanedo GM., et al., Bioorg Med Chem Lett. 2009 Oct 1;19(19):5576-81
735	Vitamin_A	0.017		Szuts EZ, Harosi FI., Arch Biochem Biophys. 1991 Jun;287(2):297-304
736	Vitamin_E	0.0209	33	AQUASOL dATAbASE 6th edition
737	Voriconazole	0.1 (VSS)		http://www.usp.org/usp-nf/pending-monographs (Accessed June 2013)
738	Warfarin	0.017	20	SRC PHYSPROP
739	Xipamide	0.058	25	AQUASOL dATAbASE 6th edition
740	Zalcitabine	70.98		AQUASOL dATAbASE 6th edition
741	Zaleplon	0.01 (PI)		http://www.accessdata.fda.gov/drugsatfda_docs/label/2013/020859s013lbl.pdf (Accessed June 2013)
742	Zanamivir	18		http://www.accessdata.fda.gov/drugsatfda_docs/label/1999/21036lbl.pdf (Accessed June 2013)
743	Zidovudine	20.1	25	SRC PHYSPROP
744	Zileuton	0.01 (PI)		http://www.accessdata.fda.gov/drugsatfda_docs/label/2012/020471s017lbl.pdf (Accessed June 2013)
745	Ziprasidone	0.000433583	pH7.4	Alelyunas YW, Liu R, Pelosi-Kilby L, et al., Eur J Pharm Sci. 2009 May 12;37(2):172-82
746	Zolmitriptan	33 (S)		http://www.accessdata.fda.gov/drugsatfda_docs/label/2012/020768s019s021,021231s010s011lbl.pdf (Accessed June 2013)
747	Zolpidem	<0.01	Tartrate (25)	AQUASOL dATAbASE 6th edition
748	Zonisamide	0.8		http://www.accessdata.fda.gov/drugsatfda_docs/label/2012/020789s012lbl.pdf (Accessed June 2013)
749	Zopiclone	0.01 (PI)		Martindale, The complete drug reference, Ed 36th, Sweetman, SC., Pharmaceutical Press, London
750	Zuclopenthixol	1000 (VS)	Dihydrochloride	Martindale, The complete drug reference, Ed 36th, Sweetman, SC., Pharmaceutical Press, London

## Sheet: Data to tabulate for suppinfo
SUPPORTING INFORMATION Complete set of compound names, CAS numbers, pharmacokinetic data, full references and comment from authors.
#	Name		Caco-2 Papp permeability x10-6 cm/s (A-B)	Caco-2 Reference	MDCK Papp permeability x10-6 cm/s (A-B)	MDCK Reference	Average		Log Papp	Papp references		Experimental Solubility mg/ml	Solubility Reference	Solubility categorical	Solubility mg/ml	Categorical solubility reference	Literature BCS Class	Lit BCS class reference	Literature BDDCS Class	Lit BDDCS class reference	Maximum Strength Dose	Maximum Strength Dose UNITS	Maximum Strength Reference	Maximum Strength Comments	Dose Number	Transport route	Transport Reference	Transporter symbol	Transporter comments	MP (°C)	MP Reference
6	Acetaminophen	x	36.31	Sherer, EC., Verras, A., Madeira, M., et al, Mol Inform, 2012, 31, 231–245	35	Chen LL, Yao J, Yang JB., et al, Acta Pharmacol Sin. 2005 Nov;26(11):1322-33	35.655	3.5655e-05	-4.44788	Sherer, EC., Verras, A., Madeira, M., et al, Mol Inform, 2012, 31, 231–245 Chen LL, Yao J, Yang JB., et al, Acta Pharmacol Sin. 2005 Nov;26(11):1322-33	HIGH	14.475	AQUASOL dATAbASE 6th edition				3	Kalantzi L, Reppas C, Dressman JB, et al., J Pharm Sci. 2006 Jan;95(1):4-14.	1	Benet LZ, Broccatelli F, Oprea TI., AAPS J. 2011 Dec;13(4):519-47	1000	mg	British National Formulary, BNF 64, September 2012	Tablet	0.276339	Carrier mediated, p-gp	Faassen F, Vogel G, Spanings H., et al., Int J Pharm. 2003 Sep 16;263(1-2):113-22	E	Subsrate and inhibitor	170	SRC PHYSPROP
794	Vardenafil	x	1.94	Choi MK, Song IS., J Pharm Pharmacol. 2012 Aug;64(8):1074-83	9.26	Choi MK, Song IS., J Pharm Pharmacol. 2012 Aug;64(8):1074-83	5.6	5.6e-06	-5.25181	Choi MK, Song IS., J Pharm Pharmacol. 2012 Aug;64(8):1074-83	LOW	0.11	http://www.accessdata.fda.gov/drugsatfda_docs/label/2011/021400s013lbl.pdf						1	Benet LZ, Broccatelli F, Oprea TI., AAPS J. 2011 Dec;13(4):519-47	20	mg	FDA Orange Book: Approved Drug Products with Therapeutic Equivalence Evaluations, 2012-2013 (online); Martindale, The complete drug reference, Ed 36th, Sweetman, SC., Pharmaceutical Press, London	Tablet (AS HYDROCHLORIDE)		Carrier mediated, p-gp, BCRP and MRP2	Choi MK, Song IS., J Pharm Pharmacol. 2012 Aug;64(8):1074-83	E
690	Sertraline hydrochloride	x	2.8	Ingels, F., Oth, M., Augustijns, P., AAPS Annual Meeting and Exposition location:Baltimore date:November 7-11, 2004 (abstract)	1.9	Feng B, Mills JB, Davidson RE,., et al., Drug Metab Dispos. 2008 Feb;36(2):268-75	2.35	2.35e-06	-5.62893	Ingels, F., Oth, M., Augustijns, P., AAPS Annual Meeting and Exposition location:Baltimore date:November 7-11, 2004 (abstract) Feng B, Mills JB, Davidson RE,., et al., Drug Metab Dispos. 2008 Feb;36(2):268-75	LOW	4.24	Deák K, Takács-Novák K, Tihanyi K, et al., Med Chem. 2006 Jul;2(4):385-9						1	Benet LZ, Broccatelli F, Oprea TI., AAPS J. 2011 Dec;13(4):519-47	50	mg	Martindale, The complete drug reference, Ed 36th, Sweetman, SC., Pharmaceutical Press, London	Tablet (AS HYDROCHLORIDE)	0.0471698					244	SRC PHYSPROP
838	Hydroxyzine	x	2.36	Laitinen L, Kangas H, Kaukonen AM., et al., Pharm Res. 2003 Feb;20(2):187-97	16.1	Feng B, Mills JB, Davidson RE,., et al., Drug Metab Dispos. 2008 Feb;36(2):268-75	9.23	9.23e-06	-5.0348	Laitinen L, Kangas H, Kaukonen AM., et al., Pharm Res. 2003 Feb;20(2):187-97 Feng B, Mills JB, Davidson RE,., et al., Drug Metab Dispos. 2008 Feb;36(2):268-75	HIGH			FS (hydrochloride)	33	Martindale, The complete drug reference, Ed 36th, Sweetman, SC., Pharmaceutical Press, London			1	Benet LZ, Broccatelli F, Oprea TI., AAPS J. 2011 Dec;13(4):519-47	25	mg	British National Formulary, BNF 64, September 2012	Tablet (AS HYDROCHLORIDE)						193	Hazardous Substances Data Bank (HSDB)
188	Crizotinib	x	9.6	http://www.accessdata.fda.gov/drugsatfda_docs/nda/2011/202570Orig1s000ClinPharmR.pdf	3.93	http://www.accessdata.fda.gov/drugsatfda_docs/nda/2011/202570Orig1s000ClinPharmR.pdf	6.765	6.765e-06	-5.16973	http://www.accessdata.fda.gov/drugsatfda_docs/nda/2011/202570Orig1s000ClinPharmR.pdf	LOW	<0.1	http://www.accessdata.fda.gov/drugsatfda_docs/label/2013/202570s004lbl.pdf								250	mg	http://www.accessdata.fda.gov/drugsatfda_docs/label/2013/202570s004lbl.pdf	Capsule		Efflux, pgp	http://www.accessdata.fda.gov/drugsatfda_docs/nda/2011/202570Orig1s000ClinPharmR.pdf	E
49	Aspirin	x	2.2	Irvine JD, Takahashi L, Lockhart K., et al., J Pharm Sci. 1999 Jan;88(1):28-33	7.4	Irvine JD, Takahashi L, Lockhart K., et al., J Pharm Sci. 1999 Jan;88(1):28-33	4.8	4.8e-06	-5.31876	Irvine JD, Takahashi L, Lockhart K., et al., J Pharm Sci. 1999 Jan;88(1):28-33	LOW	4.46	AQUASOL dATAbASE 6th edition				1	Dressman JB, Nair A, Abrahamsson B, et al., J Pharm Sci. 2012 Aug;101(8):2653-67	1	Benet LZ, Broccatelli F, Oprea TI., AAPS J. 2011 Dec;13(4):519-47	900	mg	British National Formulary, BNF 64, September 2012	Tablet	0.807175					135	SRC PHYSPROP
39	Amoxicillin	x	0.43	Sherer, EC., Verras, A., Madeira, M., et al, Mol Inform, 2012, 31, 231–245	0.24	Irvine JD, Takahashi L, Lockhart K., et al., J Pharm Sci. 1999 Jan;88(1):28-33	0.335	3.35e-07	-6.47496	Sherer, EC., Verras, A., Madeira, M., et al, Mol Inform, 2012, 31, 231–245 Irvine JD, Takahashi L, Lockhart K., et al., J Pharm Sci. 1999 Jan;88(1):28-33	LOW	4	AQUASOL dATAbASE 6th edition						3	Benet LZ, Broccatelli F, Oprea TI., AAPS J. 2011 Dec;13(4):519-47	1000	mg	British National Formulary, BNF 64, September 2012	Tablet	1	Carrier mediated, PEPT1	Estudante M, Morais JG, Soveral G., et al., Adv Drug Deliv Rev. 2012 Oct 4. pii: S0169-409X(12)00303-1.	I		194	Hazardous Substances Data Bank (HSDB), (Beta-Naphthalensulfonate Trihydrate)
739	Terbutaline	x	2.38	Skolnik S, Lin X, Wang J., et al., J Pharm Sci, 2010, 99, 3246-65	1	Irvine JD, Takahashi L, Lockhart K., et al., J Pharm Sci. 1999 Jan;88(1):28-33	1.69	1.69e-06	-5.77211	Skolnik S, Lin X, Wang J., et al., J Pharm Sci, 2010, 99, 3246-65 Irvine JD, Takahashi L, Lockhart K., et al., J Pharm Sci. 1999 Jan;88(1):28-33	LOW	90	Reverchon E, Della Porta G., Int J Pharm. 2003 Jun 4;258(1-2):1-9						3	Benet LZ, Broccatelli F, Oprea TI., AAPS J. 2011 Dec;13(4):519-47	5	mg	British National Formulary, BNF 64, September 2012	Tablet (AS SULFATE)	0.000222222	Paracellular	Hilgendorf C, Spahn-Langguth H, Regårdh CG., J Pharm Sci, 2000, 89, 63-75; Matsson P, Bergström CA, Nagahara N., et al., J Med Chem. 2005 Jan 27;48(2):604-13	*
319	Furosemide	x	0.303	Rege BD, Yu LX, Hussain AS., et al., J Pharm Sci. 2001 Nov;90(11):1776-86	0.86	Irvine JD, Takahashi L, Lockhart K., et al., J Pharm Sci. 1999 Jan;88(1):28-33; Varma MV, Gardner I, Steyn SJ., et al., Mol Pharm. 2012 May 7;9(5):1199-212	0.5815	5.815e-07	-6.23545	Rege BD, Yu LX, Hussain AS., et al., J Pharm Sci. 2001 Nov;90(11):1776-86 Irvine JD, Takahashi L, Lockhart K., et al., J Pharm Sci. 1999 Jan;88(1):28-33; Varma MV, Gardner I, Steyn SJ., et al., Mol Pharm. 2012 May 7;9(5):1199-212	LOW	0.0062	AQUASOL dATAbASE 6th edition				4	Granero GE, Longhi MR, Mora MJ., et al., J Pharm Sci. 2010 Jun;99(6):2544-56	4	Benet LZ, Broccatelli F, Oprea TI., AAPS J. 2011 Dec;13(4):519-47	80	mg	FDA Orange Book: Approved Drug Products with Therapeutic Equivalence Evaluations, 2012-2013 (online); Martindale, The complete drug reference, Ed 36th, Sweetman, SC., Pharmaceutical Press, London	Tablet	51.6129	Paracellular	Hilgendorf C, Spahn-Langguth H, Regårdh CG., J Pharm Sci, 2000, 89, 63-75	*		295	SRC PHYSPROP
52	Atenolol	x	0.408	Yazdanian, M., Glynn, SL., Wright, JL., Pharm Res, 1998, 15, 1490-1494; Yamashita S, Furubayashi T, Kataoka M.,European J Pharm Sci, 2000, 10, 195-204; Hilgendorf C, Spahn-Langguth H, Regårdh CG., J Pharm Sci, 2000, 89, 63-75; Jung SJ, Choi SO, Um SY., et al., J Pharm Biomed Anal. 2006 May 3;41(2):469-75; Stenberg P, Norinder U, Luthman K., et al., J med chem 2001;44(12):1927-37; Nordqvist, A., N…	1.19	Irvine JD, Takahashi L, Lockhart K., et al., J Pharm Sci. 1999 Jan;88(1):28-33; Varma MV, Gardner I, Steyn SJ., et al., Mol Pharm. 2012 May 7;9(5):1199-212; Varma MV, Sateesh K, Panchagnula R., Mol Pharm. 2005 Jan-Feb;2(1):12-21	0.799	7.99e-07	-6.09745	Yazdanian, M., Glynn, SL., Wright, JL., Pharm Res, 1998, 15, 1490-1494; Yamashita S, Furubayashi T, Kataoka M.,European J Pharm Sci, 2000, 10, 195-204; Hilgendorf C, Spahn-Langguth H, Regårdh CG., J Pharm Sci, 2000, 89, 63-75; Jung SJ, Choi SO, Um SY., et al., J Pharm Biomed Anal. 2006 May 3;41(2):469-75; Stenberg P, Norinder U, Luthman K., et al., J med chem 2001;44(12):1927-37; Nordqvist, A., N…	LOW	26.5	http://www.accessdata.fda.gov/drugsatfda_docs/label/2012/018240s032lbl.pdf				3	Vogelpoel H, Welink J, Amidon GL., et al., J Pharm Sci. 2004 Aug;93(8):1945-56	3	Benet LZ, Broccatelli F, Oprea TI., AAPS J. 2011 Dec;13(4):519-47	100	mg	British National Formulary, BNF 64, September 2012	Tablet	0.0150943	Paracellular and Carrier mediated, OATP1A2	Hilgendorf C, Spahn-Langguth H, Regårdh CG., J Pharm Sci, 2000, 89, 63-75; Collett A, Sims E, Walker D., et al., Pharm Res. 1996 Feb;13(2):216-21	I*		147	SRC PHYSPROP
538	Norethindrone	x	28.25	Faassen, F., Kelder, J., Lenders, J., et al., Pharm Res February 2003, Volume 20, Issue 2, pp 177-186	5.73	Kim WY, Benet LZ., Pharm Res. 2004 Jul;21(7):1284-93	16.99	1.699e-05	-4.76981	Faassen, F., Kelder, J., Lenders, J., et al., Pharm Res February 2003, Volume 20, Issue 2, pp 177-186 Kim WY, Benet LZ., Pharm Res. 2004 Jul;21(7):1284-93	HIGH	0.00633	AQUASOL dATAbASE 6th edition						1	Benet LZ, Broccatelli F, Oprea TI., AAPS J. 2011 Dec;13(4):519-47	5	mg	FDA Orange Book: Approved Drug Products with Therapeutic Equivalence Evaluations, 2012-2013 (online)	Tablet (AS ACETATE)	3.15956					203.5	SRC PHYSPROP
48	Ascorbic_Acid	x	6.24	Lu Z, Chen W, Viljoen A., et al., Phytother Res. 2010 Feb;24(2):211-8	8.15	Luo S, Wang Z, Kansara V, et al., Int J Pharm. 2008 Jun 24;358(1-2):168-76	7.195	7.195e-06	-5.14297	Lu Z, Chen W, Viljoen A., et al., Phytother Res. 2010 Feb;24(2):211-8 Luo S, Wang Z, Kansara V, et al., Int J Pharm. 2008 Jun 24;358(1-2):168-76	HIGH	249	AQUASOL dATAbASE 6th edition								2000	mg	Levine GN, Frei B, Koulouris SN., et al., Circulation. 1996 Mar 15;93(6):1107-13	Tablet	0.0321285	Carrier Mediated, SVCT1	MacDonald L, Thumser AE, Sharp P., et al., Br J Nutr. 2002 Feb;87(2):97-100	I		191	SRC PHYSPROP
656	Ranitidine	x	0.405	Rege BD, Yu LX, Hussain AS., et al., J Pharm Sci. 2001 Nov;90(11):1776-86	0.7	Varma MV, Gardner I, Steyn SJ., et al., Mol Pharm. 2012 May 7;9(5):1199-212 Rege BD, Yu LX, Hussain AS., et al., J Pharm Sci. 2001 Nov;90(11):1776-86	0.5525	5.525e-07	-6.25767	Varma MV, Gardner I, Steyn SJ., et al., Mol Pharm. 2012 May 7;9(5):1199-212 Rege BD, Yu LX, Hussain AS., et al., J Pharm Sci. 2001 Nov;90(11):1776-86	LOW	550	Kortejarvi, H., Yliperttula,M., Dressman, JB., et al., J Pharm Sci, 2005, Aug 94 (8):1617-1625				3	Kortejärvi H, Yliperttula M, Dressman JB., et al., J Pharm Sci. 2005 Aug;94(8):1617-25	3	Benet LZ, Broccatelli F, Oprea TI., AAPS J. 2011 Dec;13(4):519-47	300	mg	British National Formulary, BNF 64, September 2012	Tablet (AS HYDROCHLORIDE)	0.00218182	Carrier mediated, OCT1/OCT2, p-gp & paracellular	Collett A, Sims E, Walker D., et al., Pharm Res. 1996 Feb;13(2):216-21; Collett A, Higgs NB, Sims E., et al., J Pharmacol Exp Ther. 1999 Jan;288(1):171-8; Lennernäs, H., Palm, K., Fagerholm, U., et al., Int J Pharm, 1999 Jan;127(1) 103-107	A		69.5	SRC PHYSPROP
745	Theophylline	x	45.36	Sherer, EC., Verras, A., Madeira, M., et al, Mol Inform, 2012, 31, 231–245	17.1	Varma MV, Gardner I, Steyn SJ., et al., Mol Pharm. 2012 May 7;9(5):1199-212 Sherer, EC., Verras, A., Madeira, M., et al, Mol Inform, 2012, 31, 231–245	31.23	3.123e-05	-4.50543	Varma MV, Gardner I, Steyn SJ., et al., Mol Pharm. 2012 May 7;9(5):1199-212 Sherer, EC., Verras, A., Madeira, M., et al, Mol Inform, 2012, 31, 231–245	HIGH	7.55	AQUASOL dATAbASE 6th edition						1	Benet LZ, Broccatelli F, Oprea TI., AAPS J. 2011 Dec;13(4):519-47	500	mg	British National Formulary, BNF 64, September 2012	Tablet (Modified release)	0.264901					273	SRC PHYSPROP
340	Glyburide	x	21.6	Zerrouk N, Corti G, Ancillotti S., Eur J Pharm Biopharm. 2006 Apr;62(3):241-6	27.1	Varma MV, Gardner I, Steyn SJ., et al., Mol Pharm. 2012 May 7;9(5):1199-212 Zerrouk N, Corti G, Ancillotti S., Eur J Pharm Biopharm. 2006 Apr;62(3):241-6	24.35	2.435e-05	-4.6135	Varma MV, Gardner I, Steyn SJ., et al., Mol Pharm. 2012 May 7;9(5):1199-212 Zerrouk N, Corti G, Ancillotti S., Eur J Pharm Biopharm. 2006 Apr;62(3):241-6	HIGH	0.031	AQUASOL dATAbASE 6th edition						2	Benet LZ, Broccatelli F, Oprea TI., AAPS J. 2011 Dec;13(4):519-47	10	mg	Martindale, The complete drug reference, Ed 36th, Sweetman, SC., Pharmaceutical Press, London; FDA Orange Book: Approved Drug Products with Therapeutic Equivalence Evaluations, 2012-2013 (online)	Tablet	1.29032	Carrier Mediated, p-gp, BCRP/MXR, OATP2B1	Estudante M, Morais JG, Soveral G., et al., Adv Drug Deliv Rev. 2012 Oct 4. pii: S0169-409X(12)00303-1.	B		169	SRC PHYSPROP
99	Caffeine	x	45.165	Yazdanian, M., Glynn, SL., Wright, JL., Pharm Res, 1998, 15, 1490-1494; Garberg P, Ball M, Borg N., et al., Toxicol In Vitro. 2005 Apr;19(3):299-334; Jung SJ, Choi SO, Um SY., et al., J Pharm Biomed Anal. 2006 May 3;41(2):469-75 Grès MC, Julian B, Bourrié M., et al., Pharm Res. 1998 May;15(5):726-33; Chong S, Dando SA, Soucek KM., Pharm Res. 1996 Jan;13(1):120-3; Yee S., Pharm Res. 1997 Jun;14(6)…	30.9	Varma MV, Gardner I, Steyn SJ., et al., Mol Pharm. 2012 May 7;9(5):1199-212 Feng B, Mills JB, Davidson RE, et al.Drug Metab Dispos. 2008 Feb;36(2):268-75. Yazdanian, M., Glynn, SL., Wright, JL., Pharm Res, 1998, 15, 1490-1494; Garberg P, Ball M, Borg N., et al., Toxicol In Vitro. 2005 Apr;19(3):299-334; Jung SJ, Choi SO, Um SY., et al., J Pharm Biomed Anal. 2006 May 3;41(2):469-75 Grès MC, Julian…	38.0325	3.80325e-05	-4.41985	Varma MV, Gardner I, Steyn SJ., et al., Mol Pharm. 2012 May 7;9(5):1199-212 Feng B, Mills JB, Davidson RE, et al.Drug Metab Dispos. 2008 Feb;36(2):268-75. Yazdanian, M., Glynn, SL., Wright, JL., Pharm Res, 1998, 15, 1490-1494; Garberg P, Ball M, Borg N., et al., Toxicol In Vitro. 2005 Apr;19(3):299-334; Jung SJ, Choi SO, Um SY., et al., J Pharm Biomed Anal. 2006 May 3;41(2):469-75 Grès MC, Julian…	HIGH	21.6	AQUASOL dATAbASE 6th edition						1	Benet LZ, Broccatelli F, Oprea TI., AAPS J. 2011 Dec;13(4):519-47	200	mg	FDA Orange Book: Approved Drug Products with Therapeutic Equivalence Evaluations, 2012-2013 (online); Martindale, The complete drug reference, Ed 36th, Sweetman, SC., Pharmaceutical Press, London	Tablet	0.037037					238	SRC PHYSPROP
369	Indomethacin	x	37.16	Sherer, EC., Verras, A., Madeira, M., et al, Mol Inform, 2012, 31, 231–245	46.8	Varma MV, Gardner I, Steyn SJ., et al., Mol Pharm. 2012 May 7;9(5):1199-212; Varma MV, Sateesh K, Panchagnula R., Mol Pharm. 2005 Jan-Feb;2(1):12-21 Sherer, EC., Verras, A., Madeira, M., et al, Mol Inform, 2012, 31, 231–245	41.98	4.198e-05	-4.37696	Varma MV, Gardner I, Steyn SJ., et al., Mol Pharm. 2012 May 7;9(5):1199-212; Varma MV, Sateesh K, Panchagnula R., Mol Pharm. 2005 Jan-Feb;2(1):12-21 Sherer, EC., Verras, A., Madeira, M., et al, Mol Inform, 2012, 31, 231–245	HIGH	0.41	Hopfinger AJ, Esposito EX, Llinàs A., et al., J Chem Inf Model. 2009 Jan;49(1):1-5						2	Benet LZ, Broccatelli F, Oprea TI., AAPS J. 2011 Dec;13(4):519-47	50	mg	British National Formulary, BNF 64, September 2012	Capsule	0.487805					158	SRC PHYSPROP
107	Carbamazepine	x	41.75	Skolnik S, Lin X, Wang J., et al., J Pharm Sci, 2010, 99, 3246-65	49.45	Varma MV, Gardner I, Steyn SJ., et al., Mol Pharm. 2012 May 7;9(5):1199-212; Varma MV, Sateesh K, Panchagnula R., Mol Pharm. 2005 Jan-Feb;2(1):12-21 Skolnik S, Lin X, Wang J., et al., J Pharm Sci, 2010, 99, 3246-65	45.6	4.56e-05	-4.34104	Varma MV, Gardner I, Steyn SJ., et al., Mol Pharm. 2012 May 7;9(5):1199-212; Varma MV, Sateesh K, Panchagnula R., Mol Pharm. 2005 Jan-Feb;2(1):12-21 Skolnik S, Lin X, Wang J., et al., J Pharm Sci, 2010, 99, 3246-65	HIGH	0.15	AQUASOL dATAbASE 6th edition						2	Benet LZ, Broccatelli F, Oprea TI., AAPS J. 2011 Dec;13(4):519-47	400	mg	British National Formulary, BNF 64, September 2012	Tablet	10.6667					190.2	SRC PHYSPROP
162	Cimetidine	x	1.855	Skolnik S, Lin X, Wang J., et al., J Pharm Sci, 2010, 99, 3246-65	0.6	Varma MV, Gardner I, Steyn SJ., et al., Mol Pharm. 2012 May 7;9(5):1199-212; Varma MV, Sateesh K, Panchagnula R., Mol Pharm. 2005 Jan-Feb;2(1):12-21	1.2275	1.2275e-06	-5.91098	Varma MV, Gardner I, Steyn SJ., et al., Mol Pharm. 2012 May 7;9(5):1199-212; Varma MV, Sateesh K, Panchagnula R., Mol Pharm. 2005 Jan-Feb;2(1):12-21 Skolnik S, Lin X, Wang J., et al., J Pharm Sci, 2010, 99, 3246-65	LOW	9.3	AQUASOL dATAbASE 6th edition				3	Jantratid E, Prakongpan S, Dressman JB, et al., J Pharm Sci. 2006 May;95(5):974-84	3	Benet LZ, Broccatelli F, Oprea TI., AAPS J. 2011 Dec;13(4):519-47	800	mg	British National Formulary, BNF 64, September 2012	Tablet	0.344086	Carrier mediated, p-gp, paracellular	Varma MV, Sateesh K, Panchagnula R., Mol Pharm. 2005 Jan-Feb;2(1):12-21, 128	E*		142	SRC PHYSPROP
471	Metoprolol	x	17.74	Skolnik S, Lin X, Wang J., et al., J Pharm Sci, 2010, 99, 3246-65	24.3	Varma MV, Gardner I, Steyn SJ., et al., Mol Pharm. 2012 May 7;9(5):1199-212; Varma MV, Sateesh K, Panchagnula R., Mol Pharm. 2005 Jan-Feb;2(1):12-21	21.02	2.102e-05	-4.67737	Varma MV, Gardner I, Steyn SJ., et al., Mol Pharm. 2012 May 7;9(5):1199-212; Varma MV, Sateesh K, Panchagnula R., Mol Pharm. 2005 Jan-Feb;2(1):12-21 Skolnik S, Lin X, Wang J., et al., J Pharm Sci, 2010, 99, 3246-65	HIGH	43	AQUASOL dATAbASE 6th edition						1	Benet LZ, Broccatelli F, Oprea TI., AAPS J. 2011 Dec;13(4):519-47	200	mg	British National Formulary, BNF 64, September 2012	Tablet (AS TARTRATE)	0.0186047
46	Antipyrine	x	42.32	Yamashita S, Furubayashi T, Kataoka M.,European J Pharm Sci, 2000, 10, 195-204; Hilgendorf C, Spahn-Langguth H, Regårdh CG., J Pharm Sci, 2000, 89, 63-75; Garberg P, Ball M, Borg N., et al., Toxicol In Vitro. 2005 Apr;19(3):299-334; Jung SJ, Choi SO, Um SY., et al., J Pharm Biomed Anal. 2006 May 3;41(2):469-75; Grès MC, Julian B, Bourrié M., et al., Pharm Res. 1998 May;15(5):726-33	55.15	Varma MV, Gardner I, Steyn SJ., et al., Mol Pharm. 2012 May 7;9(5):1199-212; Varma MV, Sateesh K, Panchagnula R., Mol Pharm. 2005 Jan-Feb;2(1):12-21 Yamashita S, Furubayashi T, Kataoka M.,European J Pharm Sci, 2000, 10, 195-204; Hilgendorf C, Spahn-Langguth H, Regårdh CG., J Pharm Sci, 2000, 89, 63-75; Garberg P, Ball M, Borg N., et al., Toxicol In Vitro. 2005 Apr;19(3):299-334; Jung SJ, Choi SO,…	48.735	4.8735e-05	-4.31216	Varma MV, Gardner I, Steyn SJ., et al., Mol Pharm. 2012 May 7;9(5):1199-212; Varma MV, Sateesh K, Panchagnula R., Mol Pharm. 2005 Jan-Feb;2(1):12-21 Yamashita S, Furubayashi T, Kataoka M.,European J Pharm Sci, 2000, 10, 195-204; Hilgendorf C, Spahn-Langguth H, Regårdh CG., J Pharm Sci, 2000, 89, 63-75; Garberg P, Ball M, Borg N., et al., Toxicol In Vitro. 2005 Apr;19(3):299-334; Jung SJ, Choi SO,…	HIGH	637	AQUASOL dATAbASE 6th edition						1	Benet LZ, Broccatelli F, Oprea TI., AAPS J. 2011 Dec;13(4):519-47	500	mg	Benet LZ, Broccatelli F, Oprea TI., AAPS J. 2011 Dec;13(4):519-47	Tablet	0.00313972					114	SRC PHYSPROP
510	Naltrexone	x	15.1	Kanaan M, Daali Y, Dayer P., et al., Fundam Clin Pharmacol. 2009 Oct;23(5):543-8	40.2	Varma MV, Sateesh K, Panchagnula R., Mol Pharm. 2005 Jan-Feb;2(1):12-21 Kanaan M, Daali Y, Dayer P., et al., Fundam Clin Pharmacol. 2009 Oct;23(5):543-8	27.65	2.765e-05	-4.5583	Varma MV, Sateesh K, Panchagnula R., Mol Pharm. 2005 Jan-Feb;2(1):12-21 Kanaan M, Daali Y, Dayer P., et al., Fundam Clin Pharmacol. 2009 Oct;23(5):543-8	HIGH			FS (Hydrochloride)	100	Martindale, The complete drug reference, Ed 36th, Sweetman, SC., Pharmaceutical Press, London			1	Benet LZ, Broccatelli F, Oprea TI., AAPS J. 2011 Dec;13(4):519-47	150	mg	British National Formulary, BNF 64, September 2012	Tablet (AS HYDROCHLORIDE)						169	SRC PHYSPROP
422	Loratadine	x	48	Khan MZ, Rausl D, Zanoski R., Biol Pharm Bull. 2004 Oct;27(10):1630-5	26.4	Varma MV, Sateesh K, Panchagnula R., Mol Pharm. 2005 Jan-Feb;2(1):12-21 Khan MZ, Rausl D, Zanoski R., Biol Pharm Bull. 2004 Oct;27(10):1630-5	37.2	3.72e-05	-4.42946	Varma MV, Sateesh K, Panchagnula R., Mol Pharm. 2005 Jan-Feb;2(1):12-21 Khan MZ, Rausl D, Zanoski R., Biol Pharm Bull. 2004 Oct;27(10):1630-5	HIGH	0.01	Janssens F, Leenaerts J, Diels G., et al., J Med Chem. 2005 Mar 24;48(6):2154-66						2	Benet LZ, Broccatelli F, Oprea TI., AAPS J. 2011 Dec;13(4):519-47	10	mg	British National Formulary, BNF 64, September 2012	Tablet	4	Carrier mediated, p-gp	Varma MV, Sateesh K, Panchagnula R., Mol Pharm. 2005 Jan-Feb;2(1):12-21	E		135	SRC PHYSPROP
723	Tacrine	x	8.48	Marasanapalle VP, Crison JR, Ma J., et al., Biopharm Drug Dispos. 2009 Mar;30(2):71-80	43.8	Varma MV, Sateesh K, Panchagnula R., Mol Pharm. 2005 Jan-Feb;2(1):12-21 Marasanapalle VP, Crison JR, Ma J., et al., Biopharm Drug Dispos. 2009 Mar;30(2):71-80	26.14	2.614e-05	-4.58269	Varma MV, Sateesh K, Panchagnula R., Mol Pharm. 2005 Jan-Feb;2(1):12-21 Marasanapalle VP, Crison JR, Ma J., et al., Biopharm Drug Dispos. 2009 Mar;30(2):71-80	HIGH	0.92	Lee J, Park TG, Choi H., Int J Pharm. 2000 Feb 25;196(1):75-83.						1	Benet LZ, Broccatelli F, Oprea TI., AAPS J. 2011 Dec;13(4):519-47	40	mg	FDA Orange Book: Approved Drug Products with Therapeutic Equivalence Evaluations, 2012-2013 (online); Martindale, The complete drug reference, Ed 36th, Sweetman, SC., Pharmaceutical Press, London	Capsule	0.173913					183.5	SRC PHYSPROP
592	Pheniramine	x	4.47	Sugawara M, Kurosawa M, Sakai K., Biochim Biophys Acta. 2002 Aug 19;1564(1):149-55	30.8	Varma MV, Sateesh K, Panchagnula R., Mol Pharm. 2005 Jan-Feb;2(1):12-21 Sugawara M, Kurosawa M, Sakai K., Biochim Biophys Acta. 2002 Aug 19;1564(1):149-55	17.635	1.7635e-05	-4.75362	Varma MV, Sateesh K, Panchagnula R., Mol Pharm. 2005 Jan-Feb;2(1):12-21 Marasanapalle VP, Crison JR, Ma J., et al., Biopharm Drug Dispos. 2009 Mar;30(2):71-81	HIGH	11.05	AQUASOL dATAbASE 6th edition								45.3	mg	http://www.medicines.org.au/files/swpavilt.pdf	Tablet	0.0163982					< 25	SRC PHYSPROP
798	Verapamil	x	22.68	Skolnik S, Lin X, Wang J., et al., J Pharm Sci, 2010, 99, 3246-65	50.3	Varma MV, Sateesh K, Panchagnula R., Mol Pharm. 2005 Jan-Feb;2(1):12-21 Polli JW, Wring SA, Humphreys JE., et al., J Pharmacol Exp Ther. 2001 Nov;299(2):620-8 Skolnik S, Lin X, Wang J., et al., J Pharm Sci, 2010, 99, 3246-65	36.49	3.649e-05	-4.43783	Varma MV, Sateesh K, Panchagnula R., Mol Pharm. 2005 Jan-Feb;2(1):12-21 Polli JW, Wring SA, Humphreys JE., et al., J Pharmacol Exp Ther. 2001 Nov;299(2):620-8 Skolnik S, Lin X, Wang J., et al., J Pharm Sci, 2010, 99, 3246-65	HIGH	0.7205	Bergström CA, Luthman K, Artursson P., Eur J Pharm Sci. 2004 Aug;22(5):387-98				2	Vogelpoel H, Welink J, Amidon GL., et al., J Pharm Sci. 2004 Aug;93(8):1945-56	1	Benet LZ, Broccatelli F, Oprea TI., AAPS J. 2011 Dec;13(4):519-47	240	mg	British National Formulary, BNF 64, September 2012	Tablet (AS HYDROCHLORIDE)	1.33333	Carrier mediated, OCTN1/2, PMAT, p-gp	Estudante M, Morais JG, Soveral G., et al., Adv Drug Deliv Rev. 2012 Oct 4. pii: S0169-409X(12)00303-1.	B		<25	SRC PHYSPROP
619	Prazosin	x	7.72	Skolnik S, Lin X, Wang J., et al., J Pharm Sci, 2010, 99, 3246-65	11.43	Varma MV, Sateesh K, Panchagnula R., Mol Pharm. 2005 Jan-Feb;2(1):12-21; Di L, Whitney-Pickett C, Umland JP., et al., J Pharm Sci. 2011 Nov;100(11):4974-85 Skolnik S, Lin X, Wang J., et al., J Pharm Sci, 2010, 99, 3246-65	9.575	9.575e-06	-5.01886	Varma MV, Sateesh K, Panchagnula R., Mol Pharm. 2005 Jan-Feb;2(1):12-21; Di L, Whitney-Pickett C, Umland JP., et al., J Pharm Sci. 2011 Nov;100(11):4974-85 Skolnik S, Lin X, Wang J., et al., J Pharm Sci, 2010, 99, 3246-65	HIGH	0.0032	AQUASOL dATAbASE 6th edition						1	Benet LZ, Broccatelli F, Oprea TI., AAPS J. 2011 Dec;13(4):519-47	5	mg	British National Formulary, BNF 64, September 2012	Tablet (AS HYDROCHLORIDE)	6.25	Carrier mediated, p-gp, BCRP/MXR	Estudante M, Morais JG, Soveral G., et al., Adv Drug Deliv Rev. 2012 Oct 4. pii: S0169-409X(12)00303-1.	E		279	SRC PHYSPROP
635	Propranolol	x	21.29	Skolnik S, Lin X, Wang J., et al., J Pharm Sci, 2010, 99, 3246-65	44.95	Varma MV, Sateesh K, Panchagnula R., Mol Pharm. 2005 Jan-Feb;2(1):12-21; Mahar Doan KM, Humphreys JE, Webster LO, et al., J Pharmacol Exp Ther. 2002 Dec;303(3):1029-37 Skolnik S, Lin X, Wang J., et al., J Pharm Sci, 2010, 99, 3246-65	33.12	3.312e-05	-4.47991	Varma MV, Sateesh K, Panchagnula R., Mol Pharm. 2005 Jan-Feb;2(1):12-21; Mahar Doan KM, Humphreys JE, Webster LO, et al., J Pharmacol Exp Ther. 2002 Dec;303(3):1029-37 Skolnik S, Lin X, Wang J., et al., J Pharm Sci, 2010, 99, 3246-65	HIGH	360	Takka S, Rajbhandari S, Sakr A., Eur J Pharm Biopharm. 2001 Jul;52(1):75-82				1	Vogelpoel H, Welink J, Amidon GL., et al., J Pharm Sci. 2004 Aug;93(8):1945-56	1	Benet LZ, Broccatelli F, Oprea TI., AAPS J. 2011 Dec;13(4):519-47	160	mg	British National Formulary, BNF 64, September 2012	Tablet (AS HYDROCHLORIDE)	7.90221	Carrier mediated, p-gp	Knox C, Law V, Jewison T., et al., Nucleic Acids Res. 2011 Jan;39(Database issue):D1035-41	E		96	SRC PHYSPROP
563	Oxycodone	x	17.7	Hassan HE, Myers AL, Lee IJ, et al., J Pharm Sci. 2007 Sep;96(9):2494-506	28.3	Wager , TT., Chandrasekaran, RY., Xinjun Hou, X., et al., ACS Chem. Neurosci., 2010, 1 (6), pp 420–434 Hassan HE, Myers AL, Lee IJ, et al., J Pharm Sci. 2007 Sep;96(9):2494-506	23	2.3e-05	-4.63827	Wager , TT., Chandrasekaran, RY., Xinjun Hou, X., et al., ACS Chem. Neurosci., 2010, 1 (6), pp 420–434 Hassan HE, Myers AL, Lee IJ, et al., J Pharm Sci. 2007 Sep;96(9):2494-506	HIGH	142.9	AQUASOL dATAbASE 6th edition						1	Benet LZ, Broccatelli F, Oprea TI., AAPS J. 2011 Dec;13(4):519-47	20	mg	British National Formulary, BNF 64, September 2012	Capsule (AS HYDROCHLORIDE)	0.000559832					219	SRC PHYSPROP
169	Citalopram Hydrobromide	x	14	http://www.acrossbarriers.eu/uploads/media/FCT02-I-0305_BCS.pdf	16.7	Wager , TT., Chandrasekaran, RY., Xinjun Hou, X., et al., ACS Chem. Neurosci., 2010, 1 (6), pp 420–434 Feng B, Mills JB, Davidson RE, et al.Drug Metab Dispos. 2008 Feb;36(2):268-75.	15.35	1.535e-05	-4.81389	Wager , TT., Chandrasekaran, RY., Xinjun Hou, X., et al., ACS Chem. Neurosci., 2010, 1 (6), pp 420–434 Feng B, Mills JB, Davidson RE, et al.Drug Metab Dispos. 2008 Feb;36(2):268-75. http://www.acrossbarriers.eu/uploads/media/FCT02-I-0305_BCS.pdf	HIGH			FS (hydrobromide)	100	Martindale, The complete drug reference, Ed 36th, Sweetman, SC., Pharmaceutical Press, London			2	Benet LZ, Broccatelli F, Oprea TI., AAPS J. 2011 Dec;13(4):519-47	40	mg	British National Formulary, BNF 64, September 2012	Tablet (AS HYDROBROMIDE)		Carrier Mediated, Pgp	Karlsson L, Carlsson B, Hiemke C,et al., Eur Neuropsychopharmacol. 2013 Nov;23(11):1636-44.	E		182.5	Hazardous Substances Data Bank (HSDB), (Hydrobromide)
551	Oseltamivir phosphate	x	12	Oo C, Snell P, Barrett J., et al., Int J Pharm. 2003 May 12;257(1-2):297-9	0.35	Wen, G., Jia, R., Kardos, P., et al., The AAPS Journal. 2006; 8(S2) (Abstract)	6.175	6.175e-06	-5.20936	Oo C, Snell P, Barrett J., et al., Int J Pharm. 2003 May 12;257(1-2):297-9 Wen, G., Jia, R., Kardos, P., et al., The AAPS Journal. 2006; 8(S2) (Abstract)	LOW	>500	http://www.roche-australia.com/fmfiles/re7229005/downloads/anti-virals/tamiflu-pi.pdf			http://www.roche-australia.com/fmfiles/re7229005/downloads/anti-virals/tamiflu-pi.pdf			1	Benet LZ, Broccatelli F, Oprea TI., AAPS J. 2011 Dec;13(4):519-47	75	mg	British National Formulary, BNF 64, September 2012	Capsule (AS PHOSPHATE)		Carrier Mediated, PEPT1 & p-gp	Ogihara T, Kano T, Wagatsuma T, Wada S., Drug Metab Dispos. 2009 Aug;37(8):1676-81	B		194	http://www.roche.com/pages/csds/english/out/0471755.20070104.7029.pdf
80	Biperiden	x	82.9	Abalos IS, Rodríguez YI, Lozano V, Environ Toxicol Pharmacol. 2012 Sep;34(2):223-7		x	82.9	8.29e-05	-4.08145	Abalos IS, Rodríguez YI, Lozano V, Environ Toxicol Pharmacol. 2012 Sep;34(2):223-7	HIGH			PI	0.01	Martindale, The complete drug reference, Ed 36th, Sweetman, SC., Pharmaceutical Press, London			1	Benet LZ, Broccatelli F, Oprea TI., AAPS J. 2011 Dec;13(4):519-47	2	mg	Benet LZ, Broccatelli F, Oprea TI., AAPS J. 2011 Dec;13(4):519-47; FDA Orange Book: Approved Drug Products with Therapeutic Equivalence Evaluations, 2012-2013 (online), 365	Tablet (AS HYDROCHLORIDE)						114	SRC PHYSPROP
123	Cefixime	x	1.2	Balimane PV, Chong S, Patel K., Arch Pharm Res. 2007 Apr;30(4):507-18		x	1.2	1.2e-06	-5.92082	Balimane PV, Chong S, Patel K., Arch Pharm Res. 2007 Apr;30(4):507-18	LOW			SS	1	Martindale, The complete drug reference, Ed 36th, Sweetman, SC., Pharmaceutical Press, London			4	Benet LZ, Broccatelli F, Oprea TI., AAPS J. 2011 Dec;13(4):519-47	200	mg	British National Formulary, BNF 64, September 2012	Tablet		Carrier mediated, PEPT1	Wenzel U, Kuntz S, Diestel S., et al., Antimicrob Agents Chemother. 2002 May;46(5):1375-80	I
863	Cefaclor	x	1.5	Balimane PV, Chong S, Patel K., Arch Pharm Res. 2007 Apr;30(4):507-18		x	1.5	1.5e-06	-5.82391	Balimane PV, Chong S, Patel K., Arch Pharm Res. 2007 Apr;30(4):507-18	LOW	10	AQUASOL dATAbASE 6th edition						3	Benet LZ, Broccatelli F, Oprea TI., AAPS J. 2011 Dec;13(4):519-47	500	mg	British National Formulary, BNF 64, September 2012	Capsule (AS MONOHYDRATE)	0.2	Carrier mediated, PEPT1	Luckner P, Brandsch M., Eur J Pharm Biopharm. 2005 Jan;59(1):17-24	I	Moderate affinity for PEPT1
446	Memantine	x	43.4	Beconi, MG., Howland, D., Park, L., et al., PLoS Curr. 2011 December 15		x	43.4	4.34e-05	-4.36251	Beconi, MG., Howland, D., Park, L., et al., PLoS Curr. 2011 December 15	HIGH	38.6	http://www.accessdata.fda.gov/drugsatfda_docs/nda/2005/021627s000_namenda_clinpharmr.pdf						3	Benet LZ, Broccatelli F, Oprea TI., AAPS J. 2011 Dec;13(4):519-47	20	mg	British National Formulary, BNF 64, September 2012	Tablet (AS HYDROCHLORIDE)	0.00207254	Carrier mediated, OCT1/2	Sai, Y., Tsuji. A., Drug Discov Today. 2004 Aug 15;9(16):712-20; Estudante M, Morais JG, Soveral G., et al., Adv Drug Deliv Rev. 2012 Oct 4. pii: S0169-409X(12)00303-1.	I		258	SRC PHYSPROP
465	Methylphenobarbital	x	41	Behrens I, Stenberg P, Artursson P., et al., Pharm Res. 2001 Aug;18(8):1138-45.		x	41	4.1e-05	-4.38722	Behrens I, Stenberg P, Artursson P., et al., Pharm Res. 2001 Aug;18(8):1138-45.	HIGH	0.15	AQUASOL dATAbASE 6th edition								200	mg	The Treatment of Epilepsy, 2009, 3rd Ed, Edited by Shorvon SD., Perucca,E., Engel, J Jr. , pg 600, Wiley-Blackwell, West Sussex	Tablet	5.33333					176	SRC PHYSPROP
474	Mexiletine	x	121.4	Catalano A, Desaphy JF, Lentini G., et al., J Med Chem. 2012 Feb 9;55(3):1418-22		x	121.4	0.0001214	-3.91578	Catalano A, Desaphy JF, Lentini G., et al., J Med Chem. 2012 Feb 9;55(3):1418-22	HIGH			FS (Hydrochloride)	100	Martindale, The complete drug reference, Ed 36th, Sweetman, SC., Pharmaceutical Press, London			1	Benet LZ, Broccatelli F, Oprea TI., AAPS J. 2011 Dec;13(4):519-47	400	mg	FDA Orange Book: Approved Drug Products with Therapeutic Equivalence Evaluations, 2012-2013 (online); Martindale, The complete drug reference, Ed 36th, Sweetman, SC., Pharmaceutical Press, London	Capsule (AS HYDROCHLORIDE)						204	SRC PHYSPROP
650	Quinine	x	31.8	Crivori , P., Reinach, B. , Pezzetta, D., et al., Mol. Pharm. , 2006, 3, 33–44		x	31.8	3.18e-05	-4.49757	Crivori , P., Reinach, B. , Pezzetta, D., et al., Mol. Pharm. , 2006, 3, 33–44	HIGH	0.5497	AQUASOL dATAbASE 6th edition				1/2	Strauch S, Dressman JB, Shah VP., et al., J Pharm Sci. 2012 Feb;101(2):499-508	1	Benet LZ, Broccatelli F, Oprea TI., AAPS J. 2011 Dec;13(4):519-47	600	mg	British National Formulary, BNF 64, September 2012	Tablet (AS SULFATE)	4.36602					57	SRC PHYSPROP
865	Diphenoxylate	x	0.2	Crowe A, Wong P., Toxicol Appl Pharmacol. 2003 Nov 15;193(1):127-37		x	0.2	2e-07	-6.69897	Crowe A, Wong P., Toxicol Appl Pharmacol. 2003 Nov 15;193(1):127-37	LOW	0.8	SRC PHYSPROP								10	mg	British National Formulary, BNF 64, September 2012	Tablet (AS HYDROCHLORIDE WITH ATROPINE SULFATE)	0.05					221.25	Hazardous Substances Data Bank (HSDB)
890	Voriconazole	x	28.1	Damle B, Varma MV, Wood N., Antimicrob Agents Chemother. 2011 Nov;55(11):5172-7		x	28.1	2.81e-05	-4.55129	Damle B, Varma MV, Wood N., Antimicrob Agents Chemother. 2011 Nov;55(11):5172-7	HIGH			VSS	0.1	http://www.usp.org/usp-nf/pending-monographs			2	Benet LZ, Broccatelli F, Oprea TI., AAPS J. 2011 Dec;13(4):519-47	400	mg	British National Formulary, BNF 64, September 2012	Tablet	0.592593
236	Dolasetron	x	12.9	Dow J, Francesco GF, Berg C., J Pharm Sci. 1996 Jul;85(7):685-9		x	12.9	1.29e-05	-4.88941	Dow J, Francesco GF, Berg C., J Pharm Sci. 1996 Jul;85(7):685-9	HIGH			FS (Mesilate)	100	Martindale, The complete drug reference, Ed 36th, Sweetman, SC., Pharmaceutical Press, London			1	Benet LZ, Broccatelli F, Oprea TI., AAPS J. 2011 Dec;13(4):519-47	200	mg	FDA Orange Book: Approved Drug Products with Therapeutic Equivalence Evaluations, 2012-2013 (online); Martindale, The complete drug reference, Ed 36th, Sweetman, SC., Pharmaceutical Press, London	Tablet (AS MESILATE)						278	Hazardous Substances Data Bank (HSDB), Methanesulfonate
850	Milnacipran	x	8.9	Dyck B, Tamiya J, Jovic F., et al., J Med Chem. 2008 Nov 27;51(22):7265-72		x	8.9	8.9e-06	-5.05061	Dyck B, Tamiya J, Jovic F., et al., J Med Chem. 2008 Nov 27;51(22):7265-72	HIGH			FS (hydrochloride)	100	http://www.accessdata.fda.gov/drugsatfda_docs/label/2013/022256s016lbl.pdf			3	Benet LZ, Broccatelli F, Oprea TI., AAPS J. 2011 Dec;13(4):519-47	100	mg	FDA Orange Book: Approved Drug Products with Therapeutic Equivalence Evaluations, 2012-2013 (online)	Tablet (AS HYDROCHLORIDE)						179	Bernstein CD, Albrecht KL, Marcus DA., Expert Opin Pharmacother. 2013 May;14(7):905-16
337	Glimepiride	x	30.4	Frick A., Helga Mo, H., Wirbitzki, E., European Journal of Pharmaceutics and Biopharmaceutics 46 (1998) 305–311		x	30.4	3.04e-05	-4.51713	Frick A., Helga Mo, H., Wirbitzki, E., European Journal of Pharmaceutics and Biopharmaceutics 46 (1998) 305–311	HIGH	>0.0736	Pubchem (AID 1996): Burnham Center for Chemical Genomics (BCCG-A233-Analiza-Solubility-Assay)						2	Benet LZ, Broccatelli F, Oprea TI., AAPS J. 2011 Dec;13(4):519-47	6	mg	British National Formulary, BNF 64, September 2012	Tablet	110.4					207	Chemfinder DEMO PerkinElmer Imformatics database; Accessed 22Apr2013-6May2013
672	Rivaroxaban	x	8.1	Gnoth MJ, Buetehorn U, Muenster U., et al., J Pharmacol Exp Ther. 2011 Jul;338(1):372-80		x	8.1	8.1e-06	-5.09151	Gnoth MJ, Buetehorn U, Muenster U., et al., J Pharmacol Exp Ther. 2011 Jul;338(1):372-80	HIGH			PI	0.01	http://www.accessdata.fda.gov/drugsatfda_docs/label/2013/022406s004lbl.pdf					20	mg	British National Formulary, BNF 64, September 2012	Tablet		Carrier mediated, p-gp	Gnoth MJ, Buetehorn U, Muenster U., et al., J Pharmacol Exp Ther. 2011 Jul;338(1):372-80	E
618	Praziquantel	x	44	González-Esquivel D, Rivera J, Castro N., et al., Int J Pharm. 2005 May 13;295(1-2):93-9		x	44	4.4e-05	-4.35655	González-Esquivel D, Rivera J, Castro N., et al., Int J Pharm. 2005 May 13;295(1-2):93-9	HIGH	0.4	AQUASOL dATAbASE 6th edition						2	Benet LZ, Broccatelli F, Oprea TI., AAPS J. 2011 Dec;13(4):519-47	2400	mg	FDA Orange Book: Approved Drug Products with Therapeutic Equivalence Evaluations, 2012-2013 (online); Martindale, The complete drug reference, Ed 36th, Sweetman, SC., Pharmaceutical Press, London	Tablet	24					136	SRC PHYSPROP
897	Acetazolamide	x	0.21	Granero GE, Longhi MR, Becker C., et al, J Pharm Sci. 2008 Sep;97(9):3691-9; Crowe A, Teoh YK. J Drug Target, 2006, 14:291–300.		x	0.21	2.1e-07	-6.67778	Granero GE, Longhi MR, Becker C., et al, J Pharm Sci. 2008 Sep;97(9):3691-9; Crowe A, Teoh YK. J Drug Target, 2006, 14:291–300.	LOW	0.7112	AQUASOL dATAbASE 6th edition				Inconclusive	Granero GE, Longhi MR, Becker C, J Pharm Sci. 2008 Sep;97(9):3691-9	4	Benet LZ, Broccatelli F, Oprea TI., AAPS J. 2011 Dec;13(4):519-47	500	mg	British National Formulary, BNF 64, September 2012	Tablet/Capsule - extended release	2.81215					260.5	SRC PHYSPROP
788	UK-294,315	x	11.2	Harrison A, Betts A, Fenner K, et al, Drug Metab Dispos, 2004, 32,197-204.		x	11.2	1.12e-05	-4.95078	Harrison A, Betts A, Fenner K, et al, Drug Metab Dispos, 2004, 32,197-204.	HIGH	0.74	Harrison A, Betts A, Fenner K, et al, Drug Metab Dispos, 2004, 32,197-204.								20	mg	Harrison A, Betts A, Fenner K, et al, Drug Metab Dispos, 2004, 32,Faassen F, Vogel G, Spanings H., et al., Int J Pharm. 2003 Sep 16;263(1-2):113-22-204.	Tablet		Carrier mediated, pgp	Harrison A, Betts A, Fenner K, et al, Drug Metab Dispos, 2004, 32,Faassen F, Vogel G, Spanings H., et al., Int J Pharm. 2003 Sep 16;263(1-2):113-22-204.	E
854	Vildagliptin	x	1.5	He H, Tran P, Yin H., et al., Drug Metab Dispos. 2009 Mar;37(3):545-54		x	1.5	1.5e-06	-5.82391	He H, Tran P, Yin H., et al., Drug Metab Dispos. 2009 Mar;37(3):545-54	LOW	>50	He H, Tran P, Yin H., et al., Drug Metab Dispos. 2009 Mar;37(3):545-54								50	mg	British National Formulary, BNF 64, September 2012	Tablet	0.004
163	Cinacalcet	x	5.8	http://www.accessdata.fda.gov/drugsatfda_docs/nda/2004/21-688.pdf_Sensipar_BioPharmr.pdf		x	5.8	5.8e-06	-5.23657	http://www.accessdata.fda.gov/drugsatfda_docs/nda/2004/21-688.pdf_Sensipar_BioPharmr.pdf	LOW	<0.001	Alvarez, F. J., G. G. Lawrence, et al. (2013). RAPID DISSOLUTION FORMULATION OF CINACALCET HCl, Google Patents. EP 1663182 B1						2	Benet LZ, Broccatelli F, Oprea TI., AAPS J. 2011 Dec;13(4):519-47	90	mg	British National Formulary, BNF 64, September 2012	Tablet (AS HYDROCHLORIDE)						183	http://www.amgen.ca/Sensipar.pdf
825	Indacaterol maleate	x	19.8	http://www.accessdata.fda.gov/drugsatfda_docs/nda/2011/022383Orig1s000ClinPharmR.pdf		x	19.8	1.98e-05	-4.70333	http://www.accessdata.fda.gov/drugsatfda_docs/nda/2011/022383Orig1s000ClinPharmR.pdf	HIGH			VSS (Maleate)	0.1	Martindale, The complete drug reference, Ed 36th, Sweetman, SC., Pharmaceutical Press, London					0.3	mg	British National Formulary, BNF 64, September 2012	Inhalation powder/hard capsule (AS MALEATE)		Carrier mediated, p-gp	http://www.ema.europa.eu/docs/en_GB/document_library/EPAR_-_Public_assessment_report/human/001114/WC500053735.pdf	E	Weak subsrate	198.5	www.novartis.ca/asknovartispharma
666	Rilpivirine	x	11.92	http://www.accessdata.fda.gov/drugsatfda_docs/nda/2011/202022Orig1s000ClinPharmR.pdf		x	11.92	1.192e-05	-4.92372	http://www.accessdata.fda.gov/drugsatfda_docs/nda/2011/202022Orig1s000ClinPharmR.pdf	HIGH			PI (hydrochloride)	0.01	http://www.accessdata.fda.gov/drugsatfda_docs/label/2013/202022s005lbl.pdf					25	mg	British National Formulary, BNF 64, September 2012	Tablet (AS HYDROCHLORIDE)
680	Ruxolitinib	x	21.5	http://www.accessdata.fda.gov/drugsatfda_docs/nda/2011/202192Orig1s000ClinPharmR.pdf		x	21.5	2.15e-05	-4.66756	http://www.accessdata.fda.gov/drugsatfda_docs/nda/2011/202192Orig1s000ClinPharmR.pdf	HIGH	2.7	http://www.accessdata.fda.gov/drugsatfda_docs/label/2012/202192s001lbl.pdf								25	mg	FDA Orange Book: Approved Drug Products with Therapeutic Equivalence Evaluations, 2012-2013 (online)	Tablet	0.037037
254	Enzalutamide	x	31	http://www.accessdata.fda.gov/drugsatfda_docs/nda/2012/203415Orig1s000ClinPharmR.pdf		x	31	3.1e-05	-4.50864	http://www.accessdata.fda.gov/drugsatfda_docs/nda/2012/203415Orig1s000ClinPharmR.pdf	HIGH	0.002	http://www.accessdata.fda.gov/drugsatfda_docs/nda/2012/203415Orig1s000ClinPharmR.pdf								160	mg	http://www.accessdata.fda.gov/drugsatfda_docs/label/2013/203415s001lbl.pdf	Capsule	320
622	Pregabalin	x	1.18	Jezyk N, Li C, Stewart BH., et al., Pharm Res. 1999 Apr;16(4):519-26.		x	1.18	1.18e-06	-5.92812	Jezyk N, Li C, Stewart BH., et al., Pharm Res. 1999 Apr;16(4):519-26.	LOW	32.1	US Patent 2005/0171,203 Serial number A1 11/016,511						3	Benet LZ, Broccatelli F, Oprea TI., AAPS J. 2011 Dec;13(4):519-47	300	mg	British National Formulary, BNF 64, September 2012	Tablet	0.0373832					187	Hazardous Substances Data Bank (HSDB)
328	Gemifloxacin	x	12	Jin HE, Song B, Kim SB., et al., Xenobiotica. 2013 Apr;43(4):355-67		x	12	1.2e-05	-4.92082	Jin HE, Song B, Kim SB., et al., Xenobiotica. 2013 Apr;43(4):355-67	HIGH	0.35	http://www.accessdata.fda.gov/drugsatfda_docs/label/2007/021158s007lbl.pdf								320	mg	FDA Orange Book: Approved Drug Products with Therapeutic Equivalence Evaluations, 2012-2013 (online); Martindale, The complete drug reference, Ed 36th, Sweetman, SC., Pharmaceutical Press, London	Tablet	3.65714	Carrier mediated, pgp,MRP2	Jin HE, Song B, Kim SB., et al., Xenobiotica. 2013 Apr;43(4):355-67	E		236	Hazardous Substances Data Bank (HSDB)
597	Phenylbutazone	x	10.04	Khan S, Batchelor H, Hanson P., et al., J Pharm Sci. 2011 May 10		x	10.04	1.004e-05	-4.99827	Khan S, Batchelor H, Hanson P., et al., J Pharm Sci. 2011 May 10	HIGH	0.034	AQUASOL dATAbASE 6th edition						1	Benet LZ, Broccatelli F, Oprea TI., AAPS J. 2011 Dec;13(4):519-47	200	mg	FDA Orange Book: Approved Drug Products with Therapeutic Equivalence Evaluations, 2012-2013 (online); Martindale, The complete drug reference, Ed 36th, Sweetman, SC., Pharmaceutical Press, London	Tablet/Capsule	23.5294					105	SRC PHYSPROP
908	Clopidogrel bisulfate	x	12.7	Ki MH, Choi MH, Ahn KB., et al, Arch Pharm Res. 2008 Feb;31(2):250-8		x	12.7	1.27e-05	-4.8962	Ki MH, Choi MH, Ahn KB., et al, Arch Pharm Res. 2008 Feb;31(2):250-8	HIGH	0.01	http://www.accessdata.fda.gov/drugsatfda_docs/nda/2002/20-839S019_Clopidogrel%20Bisulfate_EAfonsi.pdf						2	Benet LZ, Broccatelli F, Oprea TI., AAPS J. 2011 Dec;13(4):519-47	300	mg	British National Formulary, BNF 64, September 2012	Tablet (AS BISULFATE)		Carrier mediated, p-gp	Taubert D, von Beckerath N, Grimberg G, et al., Clin Pharmacol Ther. 2006 Nov;80(5):486-501	E
51	Atazanavir sulfate	x	1.2	Kis O, Zastre JA, Hoque MT., et al, Pharm Res. 2013 Apr;30(4):1050-64		x	1.2	1.2e-06	-5.92082	Kis O, Zastre JA, Hoque MT., et al, Pharm Res. 2013 Apr;30(4):1050-64	LOW	4.5	http://www.accessdata.fda.gov/drugsatfda_docs/label/2012/021567s028lbl.pdf						2	Benet LZ, Broccatelli F, Oprea TI., AAPS J. 2011 Dec;13(4):519-47	400	mg	http://www.accessdata.fda.gov/drugsatfda_docs/label/2012/021567s028lbl.pdf		0.355556	Carrier mediated, p-gp, OATP	Kis O, Zastre JA, Hoque MT., et al, Pharm Res. 2013 Apr;30(4):1050-64	B	Possible inhibitory effects
870	Diethylcarbamazine	x	13.16	Kogan A, Kesselman E, Danino D., Colloids Surf B Biointerfaces. 2008 Oct 1;66(1):1-12		x	13.16	1.316e-05	-4.88074	Kogan A, Kesselman E, Danino D., Colloids Surf B Biointerfaces. 2008 Oct 1;66(1):1-12	HIGH			VS (citrate)	1000	Martindale, The complete drug reference, Ed 36th, Sweetman, SC., Pharmaceutical Press, London					150	mg	FDA Orange Book: Approved Drug Products with Therapeutic Equivalence Evaluations, 2012-2013 (online); Martindale, The complete drug reference, Ed 36th, Sweetman, SC., Pharmaceutical Press, London	Tablet (AS CITRATE)						48	SRC PHYSPROP
785	Trospium	x	0.148	Langgutha, P., Kubisb, A., Krumbiegel, G., Eur J Pharm Biopharm, 1997 Jun 43(3): 265–272		x	0.148	1.48e-07	-6.82974	Langgutha, P., Kubisb, A., Krumbiegel, G., Eur J Pharm Biopharm, 1997 Jun 43(3): 265–272	LOW	500	http://www.accessdata.fda.gov/drugsatfda_docs/label/2011/021595s007lbl.pdf						3	Benet LZ, Broccatelli F, Oprea TI., AAPS J. 2011 Dec;13(4):519-47	20	mg	British National Formulary, BNF 64, September 2012	Tablet (AS CHLORIDE)	0.00016	Carrier mediated, p-gp	Callegari E, Malhotra B, Bungay PJ., et al., Br J Clin Pharmacol. 2011 Aug;72(2):235-46	E
662	Ribavirin	x	0.18	Li F, Hong L, Mau CI., et al., J Pharm Sci. 2006 Jun;95(6):1318-25		x	0.18	1.8e-07	-6.74473	Li F, Hong L, Mau CI., et al., J Pharm Sci. 2006 Jun;95(6):1318-25	LOW	142	Hazardous Substances Data Bank (HSDB)						1	Benet LZ, Broccatelli F, Oprea TI., AAPS J. 2011 Dec;13(4):519-47	600	mg	British National Formulary, BNF 64, September 2012	Tablet	0.0169014	Carrier Mediated, CNT2	Shugarts, S. Benet, LZ., Pharm Res. 2009 September; 26(9): 2039–2054	I		167	Hazardous Substances Data Bank (HSDB)
201	Dapsone	x	11.04	Monteiro LM, Lione VF, do Carmo FA., et al, Int J Nanomedicine. 2012;7:5175-82		x	11.04	1.104e-05	-4.95703	Monteiro LM, Lione VF, do Carmo FA., et al, Int J Nanomedicine. 2012;7:5175-82	HIGH	0.15	AQUASOL dATAbASE 6th edition						2	Benet LZ, Broccatelli F, Oprea TI., AAPS J. 2011 Dec;13(4):519-47	100	mg	British National Formulary, BNF 64, September 2012	Tablet	2.66667					175.5	SRC PHYSPROP
571	Paricalcitol	x	7.89	Palaparthy R, Pradhan RS, Chan J, et al., Biopharm Drug Dispos. 2007 Mar;28(2):65-71		x	7.89	7.89e-06	-5.10292	Palaparthy R, Pradhan RS, Chan J, et al., Biopharm Drug Dispos. 2007 Mar;28(2):65-71	HIGH			PI	0.01	Martindale, The complete drug reference, Ed 36th, Sweetman, SC., Pharmaceutical Press, London			2	Benet LZ, Broccatelli F, Oprea TI., AAPS J. 2011 Dec;13(4):519-47	0.004	mg	FDA Orange Book: Approved Drug Products with Therapeutic Equivalence Evaluations, 2012-2013 (online)	Capsule
116	Cefadroxil	x	8.8	Raeissi, SD., Li, L. . Hidalgo, IJ., J Pharm Pharmacol, 1999, 51, 35–40		x	8.8	8.8e-06	-5.05552	Raeissi, SD., Li, L. . Hidalgo, IJ., J Pharm Pharmacol, 1999, 51, 35–40	HIGH			SS	1	Martindale, The complete drug reference, Ed 36th, Sweetman, SC., Pharmaceutical Press, London			3	Benet LZ, Broccatelli F, Oprea TI., AAPS J. 2011 Dec;13(4):519-47	1000	mg	British National Formulary, BNF 64, September 2012	Capsule		Carrier mediated, PEPT1	Sai, Y., Tsuji. A., Drug Discov Today. 2004 Aug 15;9(16):712-20	I
117	Cefamandole_Nafate	x	2.24	Raeissi, SD., Li, L. . Hidalgo, IJ., J Pharm Pharmacol, 1999, 51, 35–40		x	2.24	2.24e-06	-5.64975	Raeissi, SD., Li, L. . Hidalgo, IJ., J Pharm Pharmacol, 1999, 51, 35–40	LOW			FS	100	Martindale, The complete drug reference, Ed 36th, Sweetman, SC., Pharmaceutical Press, London			3	Benet LZ, Broccatelli F, Oprea TI., AAPS J. 2011 Dec;13(4):519-47	10000	mg	FDA Orange Book: Approved Drug Products with Therapeutic Equivalence Evaluations, 2012-2013 (online)	Solution (IV INJECTION)
127	Cefotaxime	x	1.56	Raeissi, SD., Li, L. . Hidalgo, IJ., J Pharm Pharmacol, 1999, 51, 35–40		x	1.56	1.56e-06	-5.80688	Raeissi, SD., Li, L. . Hidalgo, IJ., J Pharm Pharmacol, 1999, 51, 35–40	LOW			FS (Sodium)	100	Martindale, The complete drug reference, Ed 36th, Sweetman, SC., Pharmaceutical Press, London			3	Benet LZ, Broccatelli F, Oprea TI., AAPS J. 2011 Dec;13(4):519-47	4000	mg	British National Formulary, BNF 64, September 2012	Powder (IV INJECTION AS SODIUM SALT)
139	Cephalothin	x	4.48	Raeissi, SD., Li, L. . Hidalgo, IJ., J Pharm Pharmacol, 1999, 51, 35–40		x	4.48	4.48e-06	-5.34872	Raeissi, SD., Li, L. . Hidalgo, IJ., J Pharm Pharmacol, 1999, 51, 35–40	LOW	0.457	Llinàs A, Glen RC, Goodman JM., J Chem Inf Model. 2008 Jul;48(7):1289-303						3	Benet LZ, Broccatelli F, Oprea TI., AAPS J. 2011 Dec;13(4):519-47	1000	mg	FDA Orange Book: Approved Drug Products with Therapeutic Equivalence Evaluations, 2012-2013 (online); Martindale, The complete drug reference, Ed 36th, Sweetman, SC., Pharmaceutical Press, London	Solution (IV INFUSION/INJECTION)	8.75274					160.25	SRC PHYSPROP
235	Dofetilide	x	15.7	Singleton DH, Boyd H, Steidl-Nichols JV., et al, J Med Chem. 2007 Jun 28;50(13):2931-41		x	15.7	1.57e-05	-4.8041	Singleton DH, Boyd H, Steidl-Nichols JV., et al, J Med Chem. 2007 Jun 28;50(13):2931-41	HIGH			VSS	0.1	Hazardous Substances Data Bank (HSDB)			3	Benet LZ, Broccatelli F, Oprea TI., AAPS J. 2011 Dec;13(4):519-47	0.5	mg	FDA Orange Book: Approved Drug Products with Therapeutic Equivalence Evaluations, 2012-2013 (online); Martindale, The complete drug reference, Ed 36th, Sweetman, SC., Pharmaceutical Press, London	Capsule						164	MSDS Sigma aldrich http://www.sigmaaldrich.com
202	Darifenacin hydrobromide	x	19	Skerjanec, A., Clin Pharmacokinet, 2006, 45, 325-50		x	19	1.9e-05	-4.72125	Skerjanec, A., Clin Pharmacokinet, 2006, 45, 325-50	HIGH	6.03	http://www.novartis.com.au/PI_PDF/ena.pdf http://www.ema.europa.eu/docs/en_GB/document_library/EPAR_-_Scientific_Discussion/human/000554/WC500026897.pdf						1	Benet LZ, Broccatelli F, Oprea TI., AAPS J. 2011 Dec;13(4):519-47	15	mg	British National Formulary, BNF 64, September 2012	Tablet		Carrier Mediated, pgp	Skerjanec, A., Clin Pharmacokinet, 2006, 45, 325-50	E
457	Methimazole	x	48	Sköld C, Winiwarter S, Wernevik J., et al., J Med Chem. 2006 Nov 16;49(23):6660-71		x	48	4.8e-05	-4.31876	Sköld C, Winiwarter S, Wernevik J., et al., J Med Chem. 2006 Nov 16;49(23):6660-71	HIGH	~200	Hazardous Substances Data Bank (HSDB)								60	mg	FDA Orange Book: Approved Drug Products with Therapeutic Equivalence Evaluations, 2012-2013 (online); Martindale, The complete drug reference, Ed 36th, Sweetman, SC., Pharmaceutical Press, London	Tablet	0.0012					146	SRC PHYSPROP
41	Amphotericin_B	x	0.12	Skolnik S, Lin X, Wang J., et al., J Pharm Sci, 2010, 99, 3246-65		x	0.12	1.2e-07	-6.92082	Skolnik S, Lin X, Wang J., et al., J Pharm Sci, 2010, 99, 3246-65	LOW	0.003	AQUASOL dATAbASE 6th edition						2	Benet LZ, Broccatelli F, Oprea TI., AAPS J. 2011 Dec;13(4):519-47	100	mg	Martindale, The complete drug reference, Ed 36th, Sweetman, SC., Pharmaceutical Press, London; FDA Orange Book: Approved Drug Products with Therapeutic Equivalence Evaluations, 2012-2013 (online)	Powder (IV INJECTION/ORAL SUSPENSION)	133.333					170	Hazardous Substances Data Bank (HSDB)
539	Norfloxacin	x	2.36	Skolnik S, Lin X, Wang J., et al., J Pharm Sci, 2010, 99, 3246-65		x	2.36	2.36e-06	-5.62709	Skolnik S, Lin X, Wang J., et al., J Pharm Sci, 2010, 99, 3246-65	LOW	0.19	AQUASOL dATAbASE 6th edition						4	Benet LZ, Broccatelli F, Oprea TI., AAPS J. 2011 Dec;13(4):519-47	400	mg	British National Formulary, BNF 64, September 2012	Tablet	8.42105	Carrier mediated , BCRP	Merino G, Alvarez AI, Pulido MM., et al., Drug Metab Dispos. 2006 Apr;34(4):690-5	E		227.5	SRC PHYSPROP
336	Gliclazide	x	25	Stetinova, Polaskova, Smetanova, et al., Toxicology Letters, 2008, 180		x	25	2.5e-05	-4.60206	Stetinova, Polaskova, Smetanova, et al., Toxicology Letters, 2008, 180	HIGH	0.025	Grbic S, Parojcic J, Ibric S, et al., AAPS PharmSciTech. 2011 Mar;12(1):165-71						2	Benet LZ, Broccatelli F, Oprea TI., AAPS J. 2011 Dec;13(4):519-47	160	mg	British National Formulary, BNF 64, September 2012	Tablet	25.6					181	SRC PHYSPROP
398	Lercanidipine	x	0.05	US Patent 2006/0073200 A1, Serial number EP1807059 A1		x	0.05	5e-08	-7.30103	US Patent 2006/0073200 A1, Serial number EP1807059 A1	LOW	0.005	US Patent 2006/0073200 A1, Serial number EP1807059 A1								20	mg	British National Formulary, BNF 64, September 2012	Tablet (AS HYDROCHLORIDE)	16
604	Piperacillin	x	0.0325	Violette A, Cortes DA, Bergeon JA., et al., Int J Pharm. 2008 Mar 3;351(1-2):152-7		x	0.0325	3.25e-08	-7.48812	Violette A, Cortes DA, Bergeon JA., et al., Int J Pharm. 2008 Mar 3;351(1-2):152-7	LOW			FS (Hydrochloride)	100	http://www.accessdata.fda.gov/drugsatfda_docs/label/2008/050545s053lbl.pdf			3	Benet LZ, Broccatelli F, Oprea TI., AAPS J. 2011 Dec;13(4):519-47	40000	mg	FDA Orange Book: Approved Drug Products with Therapeutic Equivalence Evaluations, 2012-2013 (online)	Powder (IV INJECTION/INFUSION)	1344.54					184	http://www.pfizer.ca/en/our_products/products/monograph/273
161	Cilostazol	x	20	Young AM, Audus KL, Proudfoot J., J Pharm Sci. 2006 Apr;95(4):717-25		x	20	2e-05	-4.69897	Young AM, Audus KL, Proudfoot J., J Pharm Sci. 2006 Apr;95(4):717-25	HIGH	0.000101	Patel, SG., and Rajput., SJ., AAPS PharmSciTech. 2009 June; 10(2): 660–669						2	Benet LZ, Broccatelli F, Oprea TI., AAPS J. 2011 Dec;13(4):519-47	100	mg	British National Formulary, BNF 64, September 2012	Tablet	3960.4	Carrier mediated, pgp, uptake	Toyobuku H, Tamai I, Ueno K., et al., J Pharm Sci. 2003 Nov;92(11):2249-59	B		160	SRC PHYSPROP
2	Acamprosate	x	1.033	Zornoza T, Cano-Cebrián MJ, Nalda-Molina R, European J Pharm Sci, 2004, 22, 347-56		x	1.033	1.033e-06	-5.9859	Zornoza T, Cano-Cebrián MJ, Nalda-Molina R, European J Pharm Sci, 2004, 22, 347-56	LOW			FS (calcium)	100	Martindale, The complete drug reference, Ed 36th, Sweetman, SC., Pharmaceutical Press, London					666	mg	British National Formulary, BNF 64, September 2012	Tablet (AS CALCIUM)			Zornoza T, Cano-Cebrián MJ, Nalda-Molina R., Eur J Pharm Sci. 2004 Aug;22(5):347-56.	*	Absorption likely to occur in this route
53	Atomoxetine	x			16.7	Wager , TT., Chandrasekaran, RY., Xinjun Hou, X., et al., ACS Chem. Neurosci., 2010, 1 (6), pp 420–434	16.7	1.67e-05	-4.77728	Wager , TT., Chandrasekaran, RY., Xinjun Hou, X., et al., ACS Chem. Neurosci., 2010, 1 (6), pp 420–434	HIGH	27.8	Cao, D., Wang, J., Zhou, R. et al, J Chem Info Model, 2012, 52, 1132-1137						1	Benet LZ, Broccatelli F, Oprea TI., AAPS J. 2011 Dec;13(4):519-47	120	mg	British National Formulary, BNF 64, September 2012	Capsule (AS HYDROCHLORIDE)	0.0172662
177	Clomipramine	x			36.9	Varma MV, Sateesh K, Panchagnula R., Mol Pharm. 2005 Jan-Feb;2(1):12-21	36.9	3.69e-05	-4.43297	Varma MV, Sateesh K, Panchagnula R., Mol Pharm. 2005 Jan-Feb;2(1):12-21	HIGH			FS (Hydrochloride)	100	Martindale, The complete drug reference, Ed 36th, Sweetman, SC., Pharmaceutical Press, London			1	Benet LZ, Broccatelli F, Oprea TI., AAPS J. 2011 Dec;13(4):519-47	150	mg	FDA Orange Book: Approved Drug Products with Therapeutic Equivalence Evaluations, 2012-2013 (online); Martindale, The complete drug reference, Ed 36th, Sweetman, SC., Pharmaceutical Press, London	Capsule (AS HYDROCHLORIDE)						189.5	SRC PHYSPROP
178	Clonazepam	x			31.1	Wager , TT., Chandrasekaran, RY., Xinjun Hou, X., et al., ACS Chem. Neurosci., 2010, 1 (6), pp 420–434	31.1	3.11e-05	-4.50724	Wager , TT., Chandrasekaran, RY., Xinjun Hou, X., et al., ACS Chem. Neurosci., 2010, 1 (6), pp 420–434	HIGH	0.1	SRC PHYSPROP						1	Benet LZ, Broccatelli F, Oprea TI., AAPS J. 2011 Dec;13(4):519-47	2	mg	British National Formulary, BNF 64, September 2012; Martindale, The complete drug reference, Ed 36th, Sweetman, SC., Pharmaceutical Press, London	Tablet	0.08					237.5	SRC PHYSPROP
239	Doxapram	x			45.1	Varma MV, Sateesh K, Panchagnula R., Mol Pharm. 2005 Jan-Feb;2(1):12-21	45.1	4.51e-05	-4.34582	Varma MV, Sateesh K, Panchagnula R., Mol Pharm. 2005 Jan-Feb;2(1):12-21	HIGH			SPS (Hydrochloride)	10	Martindale, The complete drug reference, Ed 36th, Sweetman, SC., Pharmaceutical Press, London					20	mg/ml	British National Formulary, BNF 64, September 2012	Solution (IV INJECTION AS HYDROCHLORIDE)						218	Hazardous Substances Data Bank (HSDB)
241	Doxepin	x			54.2	Varma MV, Sateesh K, Panchagnula R., Mol Pharm. 2005 Jan-Feb;2(1):12-21	54.2	5.42e-05	-4.266	Varma MV, Sateesh K, Panchagnula R., Mol Pharm. 2005 Jan-Feb;2(1):12-21	HIGH	0.03157	AQUASOL dATAbASE 6th edition						1	Benet LZ, Broccatelli F, Oprea TI., AAPS J. 2011 Dec;13(4):519-47	100	mg	British National Formulary, BNF 64, September 2012	Capsule (AS HYDROCHLORIDE)	12.6703					< 25	SRC PHYSPROP
264	Ethambutol	x			0.8	Varma MV, Gardner I, Steyn SJ., et al., Mol Pharm. 2012 May 7;9(5):1199-212	0.8	8e-07	-6.09691	Varma MV, Gardner I, Steyn SJ., et al., Mol Pharm. 2012 May 7;9(5):1199-212	LOW	649	Becker C, Dressman JB, Amidon GL., et al ., J Pharm Sci. 2008 Apr;97(4):1350-60				3	Becker C, Dressman JB, Amidon GL., et al., J Pharm Sci. 2008 Apr;97(4):1350-60	3	Benet LZ, Broccatelli F, Oprea TI., AAPS J. 2011 Dec;13(4):519-47	400	mg	British National Formulary, BNF 64, September 2012	Tablet (AS HYDROCHLORIDE)	0.00246533					88	SRC PHYSPROP
276	Famciclovir	x			7.12	Varma MV, Sateesh K, Panchagnula R., Mol Pharm. 2005 Jan-Feb;2(1):12-21	7.12	7.12e-06	-5.14752	Varma MV, Sateesh K, Panchagnula R., Mol Pharm. 2005 Jan-Feb;2(1):12-21	HIGH	20	Harnden MR, Jarvest RL, Boyd MR., et al., J Med Chem. 1989 Aug;32(8):1738-43						1	Benet LZ, Broccatelli F, Oprea TI., AAPS J. 2011 Dec;13(4):519-47	750	mg	British National Formulary, BNF 64, September 2012	Tablet	0.15	Carrier mediated, p-gp	Varma MV, Sateesh K, Panchagnula R., Mol Pharm. 2005 Jan-Feb;2(1):12-21	E
296	Flumazenil	x			59.7	Varma MV, Sateesh K, Panchagnula R., Mol Pharm. 2005 Jan-Feb;2(1):12-21	59.7	5.97e-05	-4.22403	Varma MV, Sateesh K, Panchagnula R., Mol Pharm. 2005 Jan-Feb;2(1):12-21	HIGH			VSS	0.1	Martindale, The complete drug reference, Ed 36th, Sweetman, SC., Pharmaceutical Press, London			1	Benet LZ, Broccatelli F, Oprea TI., AAPS J. 2011 Dec;13(4):519-47	0.3	mg/ml	British National Formulary, BNF 64, September 2012	Solution (IV INJECTION)						202	SRC PHYSPROP
304	Flurazepam	x			70.5	Varma MV, Sateesh K, Panchagnula R., Mol Pharm. 2005 Jan-Feb;2(1):12-21	70.5	7.05e-05	-4.15181	Varma MV, Sateesh K, Panchagnula R., Mol Pharm. 2005 Jan-Feb;2(1):12-21	HIGH	500	Hazardous Substances Data Bank (HSDB)						1	Benet LZ, Broccatelli F, Oprea TI., AAPS J. 2011 Dec;13(4):519-47	30	mg	British National Formulary, BNF 64, September 2012	Capsule (AS HYDROCHLORIDE)	0.00024					79.5	SRC PHYSPROP
308	Fluvoxamine	x			31.7	Varma MV, Sateesh K, Panchagnula R., Mol Pharm. 2005 Jan-Feb;2(1):12-21	31.7	3.17e-05	-4.49894	Varma MV, Sateesh K, Panchagnula R., Mol Pharm. 2005 Jan-Feb;2(1):12-21	HIGH	14.869	Henry TB, Kwon JW, Armbrust KL., et al., Environ Toxicol Chem. 2004 Sep;23(9):2229-33.						1	Benet LZ, Broccatelli F, Oprea TI., AAPS J. 2011 Dec;13(4):519-47	150	mg	British National Formulary, BNF 64, September 2012	Tablet (AS MALEATE)	0.0403524
322	Galantamine Hydrobromine	x			15.6	Wager , TT., Chandrasekaran, RY., Xinjun Hou, X., et al., ACS Chem. Neurosci., 2010, 1 (6), pp 420–434	15.6	1.56e-05	-4.80688	Wager , TT., Chandrasekaran, RY., Xinjun Hou, X., et al., ACS Chem. Neurosci., 2010, 1 (6), pp 420–434	HIGH	31	http://www.janssen.com.au/files/Products/Reminyl_PI.pdf						1	Benet LZ, Broccatelli F, Oprea TI., AAPS J. 2011 Dec;13(4):519-47	12	mg	British National Formulary, BNF 64, September 2012	Tablet (AS HYDROBROMIDE)	0.00154839
327	Gemfibrozil	x			39.2	Huang L, Berry L, Ganga S, et al, Drug Metab Dispos. 2010 Feb;38(2):223-31.	39.2	3.92e-05	-4.40671	Huang L, Berry L, Ganga S, et al, Drug Metab Dispos. 2010 Feb;38(2):223-31.	HIGH	>0.5	AQUASOL dATAbASE 6th edition						2	Benet LZ, Broccatelli F, Oprea TI., AAPS J. 2011 Dec;13(4):519-47	600	mg	British National Formulary, BNF 64, September 2012	Tablet	4.8					62	SRC PHYSPROP
373	Isoniazid	x			21.7	Ranaldi, G., Islam, K, Sambuy, Y., Antimicrob Agents Chemother. 1992 July; 36(7): 1374–1381	21.7	2.17e-05	-4.66354	Ranaldi, G., Islam, K, Sambuy, Y., Antimicrob Agents Chemother. 1992 July; 36(7): 1374–1381	HIGH	122.8	AQUASOL dATAbASE 6th edition				1/3	Becker C, Dressman JB, Amidon GL., et al., J Pharm Sci. 2007 Mar;96(3):522-31	1	Benet LZ, Broccatelli F, Oprea TI., AAPS J. 2011 Dec;13(4):519-47	100	mg	British National Formulary, BNF 64, September 2012	Tablet	0.00325733					171.4	SRC PHYSPROP
380	Itraconazole	x			15	Varma MV, Gardner I, Steyn SJ., et al., Mol Pharm. 2012 May 7;9(5):1199-212	15	1.5e-05	-4.82391	Varma MV, Gardner I, Steyn SJ., et al., Mol Pharm. 2012 May 7;9(5):1199-212	HIGH	0.004	Ghazal, H. S.; Dyas, A. M.; Ford, J. L.; Hutcheon, G. A., Int. J. Pharm. 2009, 366, 117–123.						2	Benet LZ, Broccatelli F, Oprea TI., AAPS J. 2011 Dec;13(4):519-47	200	mg	British National Formulary, BNF 64, September 2012	Capsule (enclosed beads)	200
436	Maprotiline	x			45.5	Varma MV, Sateesh K, Panchagnula R., Mol Pharm. 2005 Jan-Feb;2(1):12-21	45.5	4.55e-05	-4.34199	Varma MV, Sateesh K, Panchagnula R., Mol Pharm. 2005 Jan-Feb;2(1):12-21	HIGH	0.0008334	AQUASOL dATAbASE 6th edition						1	Benet LZ, Broccatelli F, Oprea TI., AAPS J. 2011 Dec;13(4):519-47	75	mg	FDA Orange Book: Approved Drug Products with Therapeutic Equivalence Evaluations, 2012-2013 (online); Martindale, The complete drug reference, Ed 36th, Sweetman, SC., Pharmaceutical Press, London	Tablet (AS HYDROCHLORIDE)	359.971					93	SRC PHYSPROP
442	Mefloquine	x			9.4	Milner E, McCalmont W, Bhonsle J., et al., Malar J. 2010 Feb 11;9:5	9.4	9.4e-06	-5.02687	Milner E, McCalmont W, Bhonsle J., et al., Malar J. 2010 Feb 11;9:5	HIGH	1.806	Strauch S, Jantratid E, Dressman JB., et al., J Pharm Sci. 2011 Jan;100(1):11-21						2	Benet LZ, Broccatelli F, Oprea TI., AAPS J. 2011 Dec;13(4):519-47	250	mg	British National Formulary, BNF 64, September 2012	Tablet (AS HYDROCHLORIDE)	0.55371					259.5	Hazardous Substances Data Bank (HSDB)
464	Methylphenidate	x			26.5	Wager , TT., Chandrasekaran, RY., Xinjun Hou, X., et al., ACS Chem. Neurosci., 2010, 1 (6), pp 420–434 Feng B, Mills JB, Davidson RE, et al.Drug Metab Dispos. 2008 Feb;36(2):268-75.	26.5	2.65e-05	-4.57675	Wager , TT., Chandrasekaran, RY., Xinjun Hou, X., et al., ACS Chem. Neurosci., 2010, 1 (6), pp 420–434 Feng B, Mills JB, Davidson RE, et al.Drug Metab Dispos. 2008 Feb;36(2):268-75.	HIGH			FS (Hydrochloride)	100	Martindale, The complete drug reference, Ed 36th, Sweetman, SC., Pharmaceutical Press, London			1	Benet LZ, Broccatelli F, Oprea TI., AAPS J. 2011 Dec;13(4):519-47	50	mg	British National Formulary, BNF 64, September 2012	Tablet (AS HYDROCHLORIDE)						74.5	Hazardous Substances Data Bank (HSDB)
468	Methysergide	x			17.4	Varma MV, Sateesh K, Panchagnula R., Mol Pharm. 2005 Jan-Feb;2(1):12-21	17.4	1.74e-05	-4.75945	Varma MV, Sateesh K, Panchagnula R., Mol Pharm. 2005 Jan-Feb;2(1):12-21	HIGH			SS (Maleate)	1	Martindale, The complete drug reference, Ed 36th, Sweetman, SC., Pharmaceutical Press, London					4	mg	British National Formulary, BNF 64, September 2012	Tablet (AS MALEATE)		Carrier mediated, p-gp	Varma MV, Sateesh K, Panchagnula R., Mol Pharm. 2005 Jan-Feb;2(1):12-21	E		195	SRC PHYSPROP
472	Metronidazole	x			18.4	Varma MV, Gardner I, Steyn SJ., et al., Mol Pharm. 2012 May 7;9(5):1199-212	18.4	1.84e-05	-4.73518	Varma MV, Gardner I, Steyn SJ., et al., Mol Pharm. 2012 May 7;9(5):1199-212	HIGH	10.3	AQUASOL dATAbASE 6th edition				1	Rediguieri CF, Porta V, G Nunes DS., et al., J Pharm Sci. 2011 May;100(5):1618-27	1	Benet LZ, Broccatelli F, Oprea TI., AAPS J. 2011 Dec;13(4):519-47	500	mg	British National Formulary, BNF 64, September 2012	Tablet	0.194175					160.5	SRC PHYSPROP
485	Minocycline	x			4.9	Varma MV, Gardner I, Steyn SJ., et al., Mol Pharm. 2012 May 7;9(5):1199-212	4.9	4.9e-06	-5.3098	Varma MV, Gardner I, Steyn SJ., et al., Mol Pharm. 2012 May 7;9(5):1199-212	LOW	52	AQUASOL dATAbASE 6th edition						1	Benet LZ, Broccatelli F, Oprea TI., AAPS J. 2011 Dec;13(4):519-47	100	mg	British National Formulary, BNF 64, September 2012	Tablet	0.00769231
487	Mirtazapine	x			25.9	Wager , TT., Chandrasekaran, RY., Xinjun Hou, X., et al., ACS Chem. Neurosci., 2010, 1 (6), pp 420–434	25.9	2.59e-05	-4.5867	Wager , TT., Chandrasekaran, RY., Xinjun Hou, X., et al., ACS Chem. Neurosci., 2010, 1 (6), pp 420–434	HIGH			PI	0.01	Martindale, The complete drug reference, Ed 36th, Sweetman, SC., Pharmaceutical Press, London			1	Benet LZ, Broccatelli F, Oprea TI., AAPS J. 2011 Dec;13(4):519-47	45	mg	British National Formulary, BNF 64, September 2012	Tablet
507	Nalbuphine hydrochloride	x			14	Varma MV, Sateesh K, Panchagnula R., Mol Pharm. 2005 Jan-Feb;2(1):12-21	14	1.4e-05	-4.85387	Varma MV, Sateesh K, Panchagnula R., Mol Pharm. 2005 Jan-Feb;2(1):12-21	HIGH	35.5	http://www.accessdata.fda.gov/drugsatfda_docs/label/2005/018024s040lbl.pdf						1	Benet LZ, Broccatelli F, Oprea TI., AAPS J. 2011 Dec;13(4):519-47	20	mg/ml	FDA Orange Book: Approved Drug Products with Therapeutic Equivalence Evaluations, 2012-2013 (online); Martindale, The complete drug reference, Ed 36th, Sweetman, SC., Pharmaceutical Press, London	Solution (IV AS HYDROCHLORIDE)		Carrier mediated, p-gp	Varma MV, Sateesh K, Panchagnula R., Mol Pharm. 2005 Jan-Feb;2(1):12-21	E
508	Nalidixic_Acid	x			143.2	Ranaldi, G., Islam, K, Sambuy, Y., Antimicrob Agents Chemother. 1992 July; 36(7): 1374–1381	143.2	0.0001432	-3.84406	Ranaldi, G., Islam, K, Sambuy, Y., Antimicrob Agents Chemother. 1992 July; 36(7): 1374–1381	HIGH	0.1	AQUASOL dATAbASE 6th edition						2	Benet LZ, Broccatelli F, Oprea TI., AAPS J. 2011 Dec;13(4):519-47	900	mg	British National Formulary, BNF 64, September 2012	Suspension	36					229.5	SRC PHYSPROP
530	Nimodipine	x			15.4	Wager , TT., Chandrasekaran, RY., Xinjun Hou, X., et al., ACS Chem. Neurosci., 2010, 1 (6), pp 420–434	15.4	1.54e-05	-4.81248	Wager , TT., Chandrasekaran, RY., Xinjun Hou, X., et al., ACS Chem. Neurosci., 2010, 1 (6), pp 420–434	HIGH	0.00305461	Yu, J., He, H., Tang, X., J. Pharm. Pharmacol, 2006 58 (11), 1429–1435						2	Benet LZ, Broccatelli F, Oprea TI., AAPS J. 2011 Dec;13(4):519-47	60	mg	British National Formulary, BNF 64, September 2012	Tablet	78.5697
532	Nitrazepam	x			38.9	Varma MV, Sateesh K, Panchagnula R., Mol Pharm. 2005 Jan-Feb;2(1):12-21	38.9	3.89e-05	-4.41005	Varma MV, Sateesh K, Panchagnula R., Mol Pharm. 2005 Jan-Feb;2(1):12-21	HIGH	0.043	AQUASOL dATAbASE 6th edition						2	Benet LZ, Broccatelli F, Oprea TI., AAPS J. 2011 Dec;13(4):519-47	10	mg	British National Formulary, BNF 64, September 2012	Tablet	0.930233					225	SRC PHYSPROP
542	Nortriptyline	x			33.7	Varma MV, Sateesh K, Panchagnula R., Mol Pharm. 2005 Jan-Feb;2(1):12-21	33.7	3.37e-05	-4.47237	Varma MV, Sateesh K, Panchagnula R., Mol Pharm. 2005 Jan-Feb;2(1):12-21	HIGH	0.025	Llinàs A, Glen RC, Goodman JM., J Chem Inf Model. 2008 Jul;48(7):1289-303						1	Benet LZ, Broccatelli F, Oprea TI., AAPS J. 2011 Dec;13(4):519-47	100	mg	British National Formulary, BNF 64, September 2012	Tablet (AS HYDROCHLORIDE)	16					214	Hazardous Substances Data Bank (HSDB)
544	Olanzapine	x			18.8	Wager , TT., Chandrasekaran, RY., Xinjun Hou, X., et al., ACS Chem. Neurosci., 2010, 1 (6), pp 420–434	18.8	1.88e-05	-4.72584	Wager , TT., Chandrasekaran, RY., Xinjun Hou, X., et al., ACS Chem. Neurosci., 2010, 1 (6), pp 420–434	HIGH			PI	0.01	http://www.accessdata.fda.gov/drugsatfda_docs/label/2013/020592s063,021086s041lbl.pdf			2	Benet LZ, Broccatelli F, Oprea TI., AAPS J. 2011 Dec;13(4):519-47	20	mg	British National Formulary, BNF 64, September 2012	Tablet		Carrier mediated p-gp	Moons T, de Roo M, Claes S., et al., Pharmacogenomics. 2011 Aug;12(8):1193-211	E	Intermediate affinity
562	Oxybutynin	x			35	Callegari E, Malhotra B, Bungay PJ., et al., Br J Clin Pharmacol. 2011 Aug;72(2):235-46	35	3.5e-05	-4.45593	Callegari E, Malhotra B, Bungay PJ., et al., Br J Clin Pharmacol. 2011 Aug;72(2):235-46	HIGH	0.8	Miyamoto, E; Kawashima, S; Yoshifumi, M., et al, The Analyst, 1994, 119, (7), 1489						1	Benet LZ, Broccatelli F, Oprea TI., AAPS J. 2011 Dec;13(4):519-47	5	mg	British National Formulary, BNF 64, September 2012	Tablet (AS HYDROCHLORIDE)	0.025					129.5	Hazardous Substances Data Bank (HSDB)
573	Paroxetine	x			3.5	Wager , TT., Chandrasekaran, RY., Xinjun Hou, X., et al., ACS Chem. Neurosci., 2010, 1 (6), pp 420–434 Feng B, Mills JB, Davidson RE, et al.Drug Metab Dispos. 2008 Feb;36(2):268-75.	3.5	3.5e-06	-5.45593	Wager , TT., Chandrasekaran, RY., Xinjun Hou, X., et al., ACS Chem. Neurosci., 2010, 1 (6), pp 420–434 Feng B, Mills JB, Davidson RE, et al.Drug Metab Dispos. 2008 Feb;36(2):268-75.	LOW	6.213	Kwon JW, Armbrust KL., Bull Environ Contam Toxicol. 2008 Aug;81(2):128-35						1	Benet LZ, Broccatelli F, Oprea TI., AAPS J. 2011 Dec;13(4):519-47	60	mg	British National Formulary, BNF 64, September 2012	Tablet (AS HYDROCHLORIDE)	0.0386287					126.5	Hazardous Substances Data Bank (HSDB)
586	Perphenazine	x			30.5	Varma MV, Sateesh K, Panchagnula R., Mol Pharm. 2005 Jan-Feb;2(1):12-21	30.5	3.05e-05	-4.5157	Varma MV, Sateesh K, Panchagnula R., Mol Pharm. 2005 Jan-Feb;2(1):12-21	HIGH	0.02828	AQUASOL dATAbASE 6th edition								8	mg	British National Formulary, BNF 64, September 2012	Tablet	1.13154					97	SRC PHYSPROP
615	Pramipexole	x			12.8	Wager , TT., Chandrasekaran, RY., Xinjun Hou, X., et al., ACS Chem. Neurosci., 2010, 1 (6), pp 420–434	12.8	1.28e-05	-4.89279	Wager , TT., Chandrasekaran, RY., Xinjun Hou, X., et al., ACS Chem. Neurosci., 2010, 1 (6), pp 420–434	HIGH	>10	US Patent 2010/0086, 589, Serial number 12/630,271						3	Benet LZ, Broccatelli F, Oprea TI., AAPS J. 2011 Dec;13(4):519-47	0.7	mg	British National Formulary, BNF 64, September 2012	Tablet	0.00028
628	Procyclidine	x			70.3	Varma MV, Sateesh K, Panchagnula R., Mol Pharm. 2005 Jan-Feb;2(1):12-21	70.3	7.03e-05	-4.15304	Varma MV, Sateesh K, Panchagnula R., Mol Pharm. 2005 Jan-Feb;2(1):12-21	HIGH	0.001055	AQUASOL dATAbASE 6th edition								30	mg	British National Formulary, BNF 64, September 2012	Tablet (AS HYDROCHLORIDE)	113.744					86	SRC PHYSPROP
634	Propoxyphene	x			21.9	Feng B, Mills JB, Davidson RE,., et al., Drug Metab Dispos. 2008 Feb;36(2):268-75	21.9	2.19e-05	-4.65956	Feng B, Mills JB, Davidson RE,., et al., Drug Metab Dispos. 2008 Feb;36(2):268-75	HIGH	0.0037	AQUASOL dATAbASE 6th edition						2	Benet LZ, Broccatelli F, Oprea TI., AAPS J. 2011 Dec;13(4):519-47	100	mg	FDA Orange Book: Approved Drug Products with Therapeutic Equivalence Evaluations, 2012-2013 (online); Martindale, The complete drug reference, Ed 36th, Sweetman, SC., Pharmaceutical Press, London	Tablet (AS NAPSYLATE)	108.108					75.5	SRC PHYSPROP
642	Pyridostigmine	x			1.02	Varma MV, Sateesh K, Panchagnula R., Mol Pharm. 2005 Jan-Feb;2(1):12-21	1.02	1.02e-06	-5.9914	Varma MV, Sateesh K, Panchagnula R., Mol Pharm. 2005 Jan-Feb;2(1):12-21	LOW			VS (Bromide)	1000	Martindale, The complete drug reference, Ed 36th, Sweetman, SC., Pharmaceutical Press, London			3	Benet LZ, Broccatelli F, Oprea TI., AAPS J. 2011 Dec;13(4):519-47	120	mg	British National Formulary, BNF 64, September 2012	Tablet (AS BROMIDE)						153	Hazardous Substances Data Bank (HSDB)
644	Quetiapine	x			21.8	Wager , TT., Chandrasekaran, RY., Xinjun Hou, X., et al., ACS Chem. Neurosci., 2010, 1 (6), pp 420–434	21.8	2.18e-05	-4.66154	Wager , TT., Chandrasekaran, RY., Xinjun Hou, X., et al., ACS Chem. Neurosci., 2010, 1 (6), pp 420–434	HIGH	0.4	http://www.accessdata.fda.gov/drugsatfda_docs/nda/2007/022047Orig1s000ChemR.pdf						1	Benet LZ, Broccatelli F, Oprea TI., AAPS J. 2011 Dec;13(4):519-47	400	mg	British National Formulary, BNF 64, September 2012	Tablet (AS FUMARATE)	0.675105	Carrier mediated, p-gp	Knox C, Law V, Jewison T., et al., Nucleic Acids Res. 2011 Jan;39(Database issue):D1035-41	E		172.5	Hazardous Substances Data Bank (HSDB)
654	Ramelteon	x			33.4	Wager , TT., Chandrasekaran, RY., Xinjun Hou, X., et al., ACS Chem. Neurosci., 2010, 1 (6), pp 420–434	33.4	3.34e-05	-4.47625	Wager , TT., Chandrasekaran, RY., Xinjun Hou, X., et al., ACS Chem. Neurosci., 2010, 1 (6), pp 420–434	HIGH	0.21	http://www.ema.europa.eu/docs/en_GB/document_library/Application_withdrawal_assessment_report/2010/01/WC500064663.pdf						1	Benet LZ, Broccatelli F, Oprea TI., AAPS J. 2011 Dec;13(4):519-47	8	mg	FDA Orange Book: Approved Drug Products with Therapeutic Equivalence Evaluations, 2012-2013 (online); Martindale, The complete drug reference, Ed 36th, Sweetman, SC., Pharmaceutical Press, London	Tablet	0.152381					114	Hazardous Substances Data Bank (HSDB)
657	Reboxetine	x			12.2	Wager , TT., Chandrasekaran, RY., Xinjun Hou, X., et al., ACS Chem. Neurosci., 2010, 1 (6), pp 420–434	12.2	1.22e-05	-4.91364	Wager , TT., Chandrasekaran, RY., Xinjun Hou, X., et al., ACS Chem. Neurosci., 2010, 1 (6), pp 420–434	HIGH	250	US Patent 2009/0143,387 A1 Serial number 12/339,212						1	Benet LZ, Broccatelli F, Oprea TI., AAPS J. 2011 Dec;13(4):519-47	4	mg	British National Formulary, BNF 64, September 2012	Tablet (AS MESILATE)	6.4e-05					170.5	Hazardous Substances Data Bank (HSDB)
667	Riluzole	x			30.4	Wager , TT., Chandrasekaran, RY., Xinjun Hou, X., et al., ACS Chem. Neurosci., 2010, 1 (6), pp 420–434	30.4	3.04e-05	-4.51713	Wager , TT., Chandrasekaran, RY., Xinjun Hou, X., et al., ACS Chem. Neurosci., 2010, 1 (6), pp 420–434	HIGH			VSS	0.1	http://www.accessdata.fda.gov/drugsatfda_docs/label/2009/020599s013lbl.pdf			1	Benet LZ, Broccatelli F, Oprea TI., AAPS J. 2011 Dec;13(4):519-47	50	mg	British National Formulary, BNF 64, September 2012	Tablet		Carrier mediated, BCRP	Knox C, Law V, Jewison T., et al., Nucleic Acids Res. 2011 Jan;39(Database issue):D1035-41	E
673	Rivastigmine	x			27.3	Wager , TT., Chandrasekaran, RY., Xinjun Hou, X., et al., ACS Chem. Neurosci., 2010, 1 (6), pp 420–434	27.3	2.73e-05	-4.56384	Wager , TT., Chandrasekaran, RY., Xinjun Hou, X., et al., ACS Chem. Neurosci., 2010, 1 (6), pp 420–434	HIGH			VS (tartrate)	1000	http://www.accessdata.fda.gov/drugsatfda_docs/label/2006/020823s016,021025s008lbl.pdf			1	Benet LZ, Broccatelli F, Oprea TI., AAPS J. 2011 Dec;13(4):519-47	6	mg	British National Formulary, BNF 64, September 2012	Tablet (AS HYDROGEN TATRATE)
675	Ropinirole hydrochloride	x			26.9	Wager , TT., Chandrasekaran, RY., Xinjun Hou, X., et al., ACS Chem. Neurosci., 2010, 1 (6), pp 420–434	26.9	2.69e-05	-4.57025	Wager , TT., Chandrasekaran, RY., Xinjun Hou, X., et al., ACS Chem. Neurosci., 2010, 1 (6), pp 420–434	HIGH	133	http://www.accessdata.fda.gov/drugsatfda_docs/label/2008/020658s018s020s021lbl.pdf						1	Benet LZ, Broccatelli F, Oprea TI., AAPS J. 2011 Dec;13(4):519-47	8	mg	British National Formulary, BNF 64, September 2012	Tablet (AS HYDROCHLORIDE)	0.000240602					246.5	http://www.accessdata.fda.gov/drugsatfda_docs/label/2008/020658s018s020s021lbl.pdf
688	Selegiline	x			70.3	Varma MV, Sateesh K, Panchagnula R., Mol Pharm. 2005 Jan-Feb;2(1):12-21	70.3	7.03e-05	-4.15304	Varma MV, Sateesh K, Panchagnula R., Mol Pharm. 2005 Jan-Feb;2(1):12-21	HIGH			FS (hydrochloride)	100	Martindale, The complete drug reference, Ed 36th, Sweetman, SC., Pharmaceutical Press, London			1	Benet LZ, Broccatelli F, Oprea TI., AAPS J. 2011 Dec;13(4):519-47	10	mg	British National Formulary, BNF 64, September 2012	Tablet (AS HYDROCHLORIDE)						141.5	Hazardous Substances Data Bank (HSDB)
749	Tiagabine	x			20.7	Wager , TT., Chandrasekaran, RY., Xinjun Hou, X., et al., ACS Chem. Neurosci., 2010, 1 (6), pp 420–434	20.7	2.07e-05	-4.68403	Wager , TT., Chandrasekaran, RY., Xinjun Hou, X., et al., ACS Chem. Neurosci., 2010, 1 (6), pp 420–434	HIGH			SPS (hydrochloride)	10	Martindale, The complete drug reference, Ed 36th, Sweetman, SC., Pharmaceutical Press, London			2	Benet LZ, Broccatelli F, Oprea TI., AAPS J. 2011 Dec;13(4):519-47	15	mg	British National Formulary, BNF 64, September 2012	Tablet (AS HYDROCHLORIDE)						192	Hazardous Substances Data Bank (HSDB)
782	Trimipramine	x			40.5	Varma MV, Sateesh K, Panchagnula R., Mol Pharm. 2005 Jan-Feb;2(1):12-21	40.5	4.05e-05	-4.39254	Varma MV, Sateesh K, Panchagnula R., Mol Pharm. 2005 Jan-Feb;2(1):12-21	HIGH	0.0048	Llinàs A, Glen RC, Goodman JM., J Chem Inf Model. 2008 Jul;48(7):1289-303						2	Benet LZ, Broccatelli F, Oprea TI., AAPS J. 2011 Dec;13(4):519-47	75	mg	British National Formulary, BNF 64, September 2012	Capsule (AS MALEATE)	62.5					45	SRC PHYSPROP
797	Venlafaxine	x			21.6	Wager , TT., Chandrasekaran, RY., Xinjun Hou, X., et al., ACS Chem. Neurosci., 2010, 1 (6), pp 420–434 Feng B, Mills JB, Davidson RE, et al.Drug Metab Dispos. 2008 Feb;36(2):268-75.	21.6	2.16e-05	-4.66555	Wager , TT., Chandrasekaran, RY., Xinjun Hou, X., et al., ACS Chem. Neurosci., 2010, 1 (6), pp 420–434 Feng B, Mills JB, Davidson RE, et al.Drug Metab Dispos. 2008 Feb;36(2):268-75.	HIGH	<0.1	AQUASOL dATAbASE 6th edition						1	Benet LZ, Broccatelli F, Oprea TI., AAPS J. 2011 Dec;13(4):519-47	187.5	mg	British National Formulary, BNF 64, September 2012	Tablet (AS HYDROCHLORIDE)	7.5					103	Hazardous Substances Data Bank (HSDB)
811	Zaleplon	x			37.1	Wager , TT., Chandrasekaran, RY., Xinjun Hou, X., et al., ACS Chem. Neurosci., 2010, 1 (6), pp 420–434	37.1	3.71e-05	-4.43063	Wager , TT., Chandrasekaran, RY., Xinjun Hou, X., et al., ACS Chem. Neurosci., 2010, 1 (6), pp 420–434	HIGH			PI	0.01	http://www.accessdata.fda.gov/drugsatfda_docs/label/2013/020859s013lbl.pdf			2	Benet LZ, Broccatelli F, Oprea TI., AAPS J. 2011 Dec;13(4):519-47	10	mg	British National Formulary, BNF 64, September 2012	Tablet
820	Zonisamide	x			29.1	Wager , TT., Chandrasekaran, RY., Xinjun Hou, X., et al., ACS Chem. Neurosci., 2010, 1 (6), pp 420–434	29.1	2.91e-05	-4.53611	Wager , TT., Chandrasekaran, RY., Xinjun Hou, X., et al., ACS Chem. Neurosci., 2010, 1 (6), pp 420–434	HIGH	0.8	http://www.accessdata.fda.gov/drugsatfda_docs/label/2012/020789s012lbl.pdf						1	Benet LZ, Broccatelli F, Oprea TI., AAPS J. 2011 Dec;13(4):519-47	200	mg	FDA Orange Book: Approved Drug Products with Therapeutic Equivalence Evaluations, 2012-2013 (online); Martindale, The complete drug reference, Ed 36th, Sweetman, SC., Pharmaceutical Press, London	Capsule	1					161.5	Hazardous Substances Data Bank (HSDB)
828	Pergolide_Mesilate	x			9.7	Wager , TT., Chandrasekaran, RY., Xinjun Hou, X., et al., ACS Chem. Neurosci., 2010, 1 (6), pp 420–434	9.7	9.7e-06	-5.01323	Wager , TT., Chandrasekaran, RY., Xinjun Hou, X., et al., ACS Chem. Neurosci., 2010, 1 (6), pp 420–434	HIGH			SS (Mesilate)	1	Martindale, The complete drug reference, Ed 36th, Sweetman, SC., Pharmaceutical Press, London			2	Benet LZ, Broccatelli F, Oprea TI., AAPS J. 2011 Dec;13(4):519-47	1	mg	British National Formulary, BNF 64, September 2012	Tablet (AS MESILATE)
837	Hydrocodone	x			24.75	Wager , TT., Chandrasekaran, RY., Xinjun Hou, X., et al., ACS Chem. Neurosci., 2010, 1 (6), pp 420–434 Feng B, Mills JB, Davidson RE, et al.Drug Metab Dispos. 2008 Feb;36(2):268-75.	24.75	2.475e-05	-4.60642	Wager , TT., Chandrasekaran, RY., Xinjun Hou, X., et al., ACS Chem. Neurosci., 2010, 1 (6), pp 420–434 Feng B, Mills JB, Davidson RE, et al.Drug Metab Dispos. 2008 Feb;36(2):268-75.	HIGH			S (tartrate)	33	Martindale, The complete drug reference, Ed 36th, Sweetman, SC., Pharmaceutical Press, London			1	Benet LZ, Broccatelli F, Oprea TI., AAPS J. 2011 Dec;13(4):519-47	10	mg	FDA Orange Book: Approved Drug Products with Therapeutic Equivalence Evaluations, 2012-2013 (online); Martindale, The complete drug reference, Ed 36th, Sweetman, SC., Pharmaceutical Press, London	Tablet (AS BITARTRATE co-administered with ACETAMINOPHEN)						198	SRC PHYSPROP
846	Abacavir	x			3.44	Shaik N, Giri N, Pan G., Drug Metab Dispos. 2007 Nov;35(11):2076-85	3.44	3.44e-06	-5.46344	Shaik N, Giri N, Pan G., Drug Metab Dispos. 2007 Nov;35(11):2076-85	LOW	1.68e-06	AQUASOL dATAbASE 6th edition				3	Lindenberg M, Kopp S, Dressman JB, et al., Eur J Pharm Biopharm. 2004 Sep;58(2):265-78	1	Benet LZ, Broccatelli F, Oprea TI., AAPS J. 2011 Dec;13(4):519-47	600	mg	British National Formulary, BNF 64, September 2012	Tablet (AS SULFATE)	1.42857e+06	Carrier mediated, p-gp	Shaik N, Giri N, Pan G., Drug Metab Dispos. 2007 Nov;35(11):2076-85	E
879	Ethosuximide	x			26.8	Feng B, Mills JB, Davidson RE,., et al., Drug Metab Dispos. 2008 Feb;36(2):268-75	26.8	2.68e-05	-4.57187	Feng B, Mills JB, Davidson RE,., et al., Drug Metab Dispos. 2008 Feb;36(2):268-75	HIGH	190	AQUASOL dATAbASE 6th edition						1	Benet LZ, Broccatelli F, Oprea TI., AAPS J. 2011 Dec;13(4):519-47	750	mg	British National Formulary, BNF 64, September 2012	Capsule	0.0157895					64.5	SRC PHYSPROP
Removed compounds asin The pham dataset
167	Ciprofloxacin	x	4.83125	Pham The, H., González-Álvarez, I., Bermejo, M., et al, Mol Inform, 2011, 30, 376–385	1.4	Varma MV, Gardner I, Steyn SJ., et al., Mol Pharm. 2012 May 7;9(5):1199-212	3.11562	3.11562e-06	-5.50645	Pham The, H., González-Álvarez, I., Bermejo, M., et al, Mol Inform, 2011, 30, 376–385	LOW	0.086	AQUASOL dATAbASE 6th edition				4	Olivera ME, Manzo RH, Junginger HE., et al., J Pharm Sci. 2011 Jan;100(1):22-33	4	Benet LZ, Broccatelli F, Oprea TI., AAPS J. 2011 Dec;13(4):519-47	750	mg	British National Formulary, BNF 64, September 2012	Tablet (AS HYDROCHLORIDE)	34.8837	Carrier Mediated, BCRP/MXR, OATP1A2	Estudante M, Morais JG, Soveral G., et al., Adv Drug Deliv Rev. 2012 Oct 4. pii: S0169-409X(12)00303-1.	B		256	Hazardous Substances Data Bank (HSDB)
324	Ganciclovir	x	1.22333	Pham The, H., González-Álvarez, I., Bermejo, M., et al, Mol Inform, 2011, 30, 376–385	0.5	Varma MV, Gardner I, Steyn SJ., et al., Mol Pharm. 2012 May 7;9(5):1199-212	0.861667	8.61667e-07	-6.06466		LOW	3.37	AQUASOL dATAbASE 6th edition						3	Benet LZ, Broccatelli F, Oprea TI., AAPS J. 2011 Dec;13(4):519-47	500	mg	British National Formulary, BNF 64, September 2012	Solution (IV INFUSION AS SODIUM SALT)	0.593472	Carrier mediated, OCT1	Sai, Y., Tsuji. A., Drug Discov Today. 2004 Aug 15;9(16):712-20	I		250	SRC PHYSPROP
285	Fenoterol	x	0.129	Pham The, H., González-Álvarez, I., Bermejo, M., et al, Mol Inform, 2011, 30, 376–385		x	0.129	1.29e-07	-6.88941	Pham The, H., González-Álvarez, I., Bermejo, M., et al, Mol Inform, 2011, 30, 376–385	LOW	61.45	Elshafeeya, AE., Hamzab, YE., Aminb, SY., et al., J Adv Res. 2012, Apr; 3(2): 125–132								5	mg	Dudenhausen JW, Hermer M, Rominger KL., Geburtshilfe Frauenheilkd. 1989 Mar;49(3):234-6 (German)	Tablet
306	Flutamide	x	47.5	Pham The, H., González-Álvarez, I., Bermejo, M., et al, Mol Inform, 2011, 30, 376–385		x	47.5	4.75e-05	-4.32331	Pham The, H., González-Álvarez, I., Bermejo, M., et al, Mol Inform, 2011, 30, 376–385	HIGH			PI	0.01	Martindale, The complete drug reference, Ed 36th, Sweetman, SC., Pharmaceutical Press, London			2	Benet LZ, Broccatelli F, Oprea TI., AAPS J. 2011 Dec;13(4):519-47
437	Maraviroc	x	1	Pham The, H., González-Álvarez, I., Bermejo, M., et al, Mol Inform, 2011, 30, 376–385		x	1	1e-06	-6	Pham The, H., González-Álvarez, I., Bermejo, M., et al, Mol Inform, 2011, 30, 376–385	LOW			VS	1000	Hazardous Substances Data Bank (HSDB)			1	Benet LZ, Broccatelli F, Oprea TI., AAPS J. 2011 Dec;13(4):519-47	300	mg	British National Formulary, BNF 64, September 2012	Tablet		Carrier mediated, p-gp	Walker DK, Abel S, Comby P, et al, Drug Metab Dispos, 2005, 33, 587-95	E		197.5	Hazardous Substances Data Bank (HSDB)
455	Metformin	x	1.2	Pham The, H., González-Álvarez, I., Bermejo, M., et al, Mol Inform, 2011, 30, 376–385		x	1.2	1.2e-06	-5.92082	Pham The, H., González-Álvarez, I., Bermejo, M., et al, Mol Inform, 2011, 30, 376–385	LOW			FS (Hydrochloride)	100	Martindale, The complete drug reference, Ed 36th, Sweetman, SC., Pharmaceutical Press, London			3	Benet LZ, Broccatelli F, Oprea TI., AAPS J. 2011 Dec;13(4):519-47	850	mg	British National Formulary, BNF 64, September 2012	Tablet (AS HYDROCHLORIDE)		Carrier mediated, PMAT & paracellular	Estudante M, Morais JG, Soveral G., et al., Adv Drug Deliv Rev. 2012 Oct 4. pii: S0169-409X(12)00303-1.; Zhou M, Xia L, Wang J., Drug Metab Dispos. 2007 Oct;35(10):1956-62	I*		219	Hazardous Substances Data Bank (HSDB)
665	Rifampin		3.99	Pham The, H., González-Álvarez, I., Bermejo, M., et al, Mol Inform, 2011, 30, 376–385		x	3.99	3.99e-06	-5.39903	Pham The, H., González-Álvarez, I., Bermejo, M., et al, Mol Inform, 2011, 30, 376–385	LOW	2.792	AQUASOL dATAbASE 6th edition				2	Becker C, Dressman JB, Junginger HE., et al., J Pharm Sci. 2009 Jul;98(7):2252-67	2	Benet LZ, Broccatelli F, Oprea TI., AAPS J. 2011 Dec;13(4):519-47	600	mg	FDA Orange Book: Approved Drug Products with Therapeutic Equivalence Evaluations, 2012-2013 (online); Martindale, The complete drug reference, Ed 36th, Sweetman, SC., Pharmaceutical Press, London	Capsule	0.859599					185.5	Hazardous Substances Data Bank (HSDB)
701	Stavudine	x	4.5	Pham The, H., González-Álvarez, I., Bermejo, M., et al, Mol Inform, 2011, 30, 376–385		x	4.5	4.5e-06	-5.34679	Pham The, H., González-Álvarez, I., Bermejo, M., et al, Mol Inform, 2011, 30, 376–385	LOW	85	AQUASOL dATAbASE 6th edition				1	Silva AL, Cristofoletti R, Storpirtis S., et al., J Pharm Sci. 2011;100(5):1628-36	3	Benet LZ, Broccatelli F, Oprea TI., AAPS J. 2011 Dec;13(4):519-47	40	mg	British National Formulary, BNF 64, September 2012	Capsule	0.00188235	Carrier mediated, CNT1	Minuesa, G., I. Huber-Ruano, et al. Pharmacol. Ther, 2011 132(3): 268-279.	I		159.5
803	Vinblastine	x	0.82	Skolnik S, Lin X, Wang J., et al., J Pharm Sci, 2010, 99, 3246-65	1	Varma MV, Sateesh K, Panchagnula R., Mol Pharm. 2005 Jan-Feb;2(1):12-21	0.91	9.1e-07	-6.04096		LOW			FS (Sulfate)	100	Martindale, The complete drug reference, Ed 36th, Sweetman, SC., Pharmaceutical Press, London			1	Benet LZ, Broccatelli F, Oprea TI., AAPS J. 2011 Dec;13(4):519-47	1	mg/ml	British National Formulary, BNF 64, September 2012	Solution (IV INJECTION AS SULFATE)		Carrier mediated, p-gp, MRP2	Estudante M, Morais JG, Soveral G., et al., Adv Drug Deliv Rev. 2012 Oct 4. pii: S0169-409X(12)00303-1.	E		213.5	Hazardous Substances Data Bank (HSDB)
115	Carvedilol	x	10.19	Bachmakov I, Werner U, Endress B., et al., Fundam Clin Pharmacol. 2006 Jun;20(3):273-82		x	10.19	1.019e-05	-4.99183	Bachmakov I, Werner U, Endress B., et al., Fundam Clin Pharmacol. 2006 Jun;20(3):273-82	HIGH	0.0004492	AQUASOL dATAbASE 6th edition						2	Benet LZ, Broccatelli F, Oprea TI., AAPS J. 2011 Dec;13(4):519-47	50	mg	British National Formulary, BNF 64, September 2012	Tablet	445.236					114.5	SRC PHYSPROP

## Sheet: Supporting Information S3
Supporting information S3: Molecular descriptors used to build solubility and permeability models selected by feature selection
Solubility Top 20 Molecular descriptors selected using predictor importance using Random Forest
Descriptor	Description
LogD(2)	Apparent distribution coefficient at pH 2 calculated by ACD
LogD(6.5)	Apparent distribution coefficient at pH 6.5 calculated by ACD
LogD(5.5)	Apparent distribution coefficient at pH 5.5 calculated by ACD
PEOE_VSA_POL	Total polar van der Waals surface area using calculated partial charges by PEOE
PEOE_VSA_HYD	Total hydrophobic van der Waals surface area using calculated partial charges by PEOE
FIBpH6.5	Fraction of drug ionised as bases as pH 6.5
BCUT_PEOE_0	The BCUT descriptors are calculated from the eigenvalues of a modified adjacency matrix using calculated partial charges by PEOE
LogD(7.4)	Apparent distribution coefficient at pH 7.4 calculated by ACD
PEOE_VSA_FPOS	Fractional positive van der Waals surface area using calculated partial charges by PEOE
FIBpH5.5	Fraction of drug ionised as bases as pH 5.5
BCUT_SLOGP_2	The BCUT descriptors are calculated from the eigenvalues of a modified adjacency matrix using atomic contribution to logP instead of partial charge.
vsurf_Wp4	Polar volume
b_single	Number of single bonds (including implicit hydrogens).
FIBpH2	Fraction of drug ionised as bases as pH 2
VDistEq	VDistEq is related to the size and shape of a molecule.
GCUT_PEOE_3	The GCUT descriptors are calculated from the eigenvalues of a modified graph distance adjacency matrix using calculated partial charges by PEOE
PEOE_VSA_FHYD	Fractional hydrophobic van der Waals surface area
FCASA-	Fractional negative charge weighted surface area
rgyr	Radius of gyration
MaxHp	Largest positive charge on a hydrogen atom
Permeability Top 20 Molecular descriptors selected using predictor importance using Random Forest
Descriptor	Description
LogD(6.5)	Apparent distribution coefficient at pH 6.5 calculated by ACD
vsurf_CW4	Capacity factor
LogD(5.5)	Apparent distribution coefficient at pH 5.5 calculated by ACD
vsurf_HB1	H-bond donor capacity
LogD(10)	Apparent distribution coefficient at pH 10 calculated by ACD
xv2	Valence chi 2 index
vsurf_W3	Hydrophilic volume
chi1_C	Carbon connectivity index (order 1)
FIBpH7.4	Fraction of drug ionised as base as pH 7.4
vsurf_HL2	Hydrophilic-Lipophilic balance
PEOE_RPC-	Relative partial charge calculated using PEOE
LogD(7.4)	Apparent distribution coefficient at pH 7.4 calculated by ACD
vsurf_Wp2	Polar Volume
vsurf_HL1	Hydrophilic-Lipophilic balance
PSA	Polar Surface area
vsurf_W2	Hydrophilic volume
FIBpH6.5	Fraction of drug ionised as bases as pH 6.5
GCUT_PEOE_0	The GCUT descriptors are calculated from the eigenvalues of a modified graph distance adjacency matrix using calculated partial charges by PEOE
vsurf_Wp3	Polar Volume
FIAB_6.5	Fraction of drug ionised as base multiplied by fraction ionised as anion calculated at pH 6.5

## Sheet: Supporting Information S4
Supporting information S4
Models from C&RT analysis used in this manuscript
Solubility Models (Table 4)										Permeability Models (Table 5)
Solubility Model 1										Permeability Model 1
Solubility Model 2										Permeability Model 2
										Permeability Model 3
										Permeability Model 4
										Permeability Model 5
										Permeability Model 6
